# Supplementary material for: Scavenger receptor-targeted plaque delivery of microRNA-coated nanoparticles for alleviating atherosclerosis
Source: PubMed Central journal article supplement — Proc Natl Acad Sci U S A. 2022 Sep 19;119(39):e2201443119. doi: 10.1073/pnas.2201443119 (PMC9522431; doi:10.1073/pnas.2201443119), 2022-09-19
Supplement: pnas.2201443119.sapp.pdf [file pnas.2201443119.sapp.pdf]

## Supplementary Information for

### Scavenger Receptor-Targeted Plaque Delivery of MicroRNA-Coated Nanoparticles for Alleviating Atherosclerosis

*Qianqian Bai, † Yu Xiao, † Huiling Hong, ‡ Xiaoyun Cao, ‡ Lei Zhang, † Ruifang Han, † Leo Kit Cheung Lee, † Evelyn Y. Xue, § Xiao Yu Tian, \*‡ Chung Hang Jonathan Choi\* †*

†Department of Biomedical Engineering, ‡ School of Biomedical Sciences, § Department of Chemistry, The Chinese University of Hong Kong, Shatin, New Territories, Hong Kong SAR

\*Xiao Yu Tian, \*Chung Hang Jonathan Choi

Email: [xytian@cuhk.edu.hk](mailto:xytian@cuhk.edu.hk), [jchchoi@cuhk.edu.hk](mailto:jchchoi@cuhk.edu.hk)

#### **This PDF file includes:**

Supplementary text (SI Materials and Methods and SI Extended Results and Discussion)  
Fig. S1 to S41  
Tables S1 to S6  
SI References

## SI Materials and Methods

**Synthesis and characterization of polyethylene glycol-coated superparamagnetic iron oxide nanoparticles (PEG-SPIONs).** PEG-SPIONs with carboxylate groups were prepared by thermal decomposition following our published protocol (1). Briefly, 262.5 mg of ferric acetylacetonate [ $\text{Fe}(\text{acac})_3$ ; Sigma-Aldrich] was added to 1 mL of oleylamine (Sigma-Aldrich) and 3.0 g of dicarboxyl-terminated PEG ( $\text{HOOC-PEG-COOH}$ ; molecular weight: 2000 Da; Sigma-Aldrich) in 12.5 mL of diphenyl ether (Sigma-Aldrich). After aging the mixture at 80°C under nitrogen for 4 h, the reaction proceeded under reflux at 255°C for 30 min. By redispersing PEG-SPIONs in ethanol and subsequently precipitating with chilled diethyl ether (RCI Labscan) for three cycles, the nanocrystals were purified and collected for further characterization. Cyanine 5 amine (Lumiprobe) were used to generate Cy5-tagged PEG-SPIONs via DCC/NHS chemistry, respectively. Briefly, 5 mg of carboxylated PEG-SPIONs was dissolved in 0.5 mL of anhydrous dimethyl sulfoxide (DMSO; J&K Seal) and activated with 4.12 mg *N,N'*-dicyclohexylcarbodiimide (DCC; Sigma-Aldrich) and *N*-hydroxysuccinimide 3.45 mg of (NHS; Sigma-Aldrich) for 2 h. Next, 6 nmol  $\text{Cy5-NH}_2$  was added to the reaction mixture and left shaking overnight. Cy5-SPIONs were dialyzed against DEPC-treated (BIA0881, J&K) nanopure water by using a dialysis membrane (molecular weight cutoff size: 50000 Da; Yi Bo Biological) for 2-3 days, passed through 0.2  $\mu\text{m}$  aqueous syringe filters, and resuspended in Nanopure water. The physical size and morphology of the resultant PEG-SPIONs were examined by transmission electron microscopy (TEM) at 100 kV voltage (Hitachi H7700). The hydrodynamic size and surface charge of NPs were measured by dynamic light scattering (DLS, Zetasizer Nano ZS90, Malvern). The concentration of PEG-SPIONs were analyzed by ICP-MS (Agilent 7900).

**Preparation of microRNA-functionalized SPIONs (miR-SPIONs).** Amine-modified, phosphorothioated (PS) microRNA strands ( $\text{miR-NH}_2$ ; Idobio) were covalently attached to carboxylate-terminated PEG-SPIONs. Typically, 5 mg of carboxylated PEG-SPIONs was dissolved in 0.5 mL of DMSO and activated with 4.12 mg DCC and 3.45 mg of NHS for 2 h. Next, 6 nmol  $\text{miR-NH}_2$  was added to the reaction mixture and left shaking overnight. miR-SPIONs were processed under same procedure with Cy5-SPIONs. The hydrodynamic size and surface charge of the NPs were measured by DLS. Conjugation of miRs to PEG-SPIONs was confirmed by gel electrophoresis. The loading of miR on the SPION core was calculated based on a fluorescence-based assay, following literature precedent (1). The concentration of Cy5-labeled miR before and after their DCC/NHS reaction with PEG-SPIONs was measured by plate reader (MULTISKAN GO, Thermo Scientific), followed by dividing the difference in miR concentration by the concentration of PEG-SPIONs to obtain the loading of miR. See sequence of oligonucleotides in Table S2.

**Agarose gel electrophoresis.** 6  $\mu\text{L}$  of 50 mg/mL PEG-SPIONs or miR-SPIONs (with or without Cy5) and 2  $\mu\text{L}$  of 15% (w/v) Ficoll® 400 (Sigma) were loaded onto a 1% agarose (Baygene Biotech) gel in 0.5 $\times$  TBE buffer. The bands were resolved by electrophoresis at 120 V for 25 min using a Mini-300 (Major Science) power supply.

**Denaturing polyacrylamide-urea gel electrophoresis (urea-PAGE).** In each sample, 1  $\mu\text{L}$  of 6X DNA Gel Loading Dye (Thermo Fisher Scientific) were added to 5  $\mu\text{L}$  of free miR-146a, PEG-SPIONs, miR-146a-SPIONs, miR-nc-SPIONs, abasic-SPIONs, or a physical mixture of PEG-SPIONs and free miR-146a in diethyl pyrocarbonate (DEPC; J&K)-treated Nanopure water. The mass of nucleic acid, in free or NP forms, was kept constant at 120 ng per sample. The amount of SPIONs added was kept constant at 1.5  $\mu\text{g}$  of Fe per sample. Each 6  $\mu\text{L}$  sample and 10  $\mu\text{L}$  of microRNA marker (New England Biolabs) were denatured at 95°C for 5 min. After cooling down to room temperature (RT), the samples were kept on ice until use. Also, 10  $\mu\text{L}$  of microRNA marker (New England Biolabs) was similarly denatured, cooled, and kept on ice. Next, a 15% (w/v) denaturing polyacrylamide-urea gel was prepared by adding 4.8 g of urea (TCI) in 5 mL 30% (w/v) acrylamide/bis solution (Bio-Rad) and 1 mL 10X TBE buffer (Beyotime). After gelation at RT for ~10 min, each sample (6  $\mu\text{L}$ ) or microRNA marker (10  $\mu\text{L}$ ) was loaded into each well of the denaturing PAGE gel. After resolving the loaded gel at 40 V for 6 h using Power PAC 300 (Bio-Rad), the gel was stained with 10 mL of 5X SYBR Gold Nucleic Acid Gel Stain (Thermo Fisher Scientific) for 5 min. The stained gel was imaged under "SYBR Gold" mode using the ChemiDoc™ Touch Imaging System (Bio-Rad) to reveal the free oligonucleotides inside the gel.

**Cell culture.** RAW 264.7 (mouse macrophage; ATCC) and C166 (mouse endothelial; ATCC) cells were cultured in complete Dulbecco's Modified Eagle Medium (DMEM; Gibco) [i.e., DMEM supplemented with 10% fetal bovine serum (FBS; Gibco) and 1% penicillin-streptomycin (Gibco)] and maintained at 37°C and 5% CO<sub>2</sub>.

**Cellular uptake by TEM imaging.** Freshly harvested cell pellets were fixed with glutaraldehyde (2.5% in phosphate buffer; pH = 7.2-7.4; J&K Scientific) for 2 h and stained by osmium tetroxide [1%; Electron Microscopy Sciences (EMS)] for another 2 h. Pellets were dehydrated in increasing ethanol gradients and propylene oxide, embedded in Epon 812 resins (EMS), and polymerized at 55°C for 2 d. Ultrathin sections of 70 nm thick were deposited onto 200-mesh copper grids (EMS) and stained with 4% uranyl acetate (EMS, in 50% methanol/water) and Reynolds lead citrate (Sigma) for TEM imaging at a beam voltage of 100 kV (Hitachi H7700).

**Cytotoxicity of SPIONs.** Cells were plated in a 96-well plate at a density of 10<sup>5</sup> cells per well 24 h before the experiment. The cells were incubated with 5 nM SPIONs in medium for 24 h at the same concentration used in the cellular uptake experiments. After removing the medium and rinsing the cells, the alamarBlue reagent (Invitrogen) was used to test the cell viability according to the manufacturer's instructions by measuring the optical absorbance at 570 nm and 600 nm by plate reader. Reported data represent mean ± SEM from six independent experiments.

**Preparation of cell samples for *in vitro* efficacy by qRT-PCR.** Pre-seeded in 6-well plates and grown to ~80% confluency, cells were transfected with 1 mL of DMEM supplemented with 1% FBS and containing either 5 nM miR-146a-SPIONs or 5 nM non-targeting control miR-nc-SPIONs for 24 h. Next, the NP-containing medium was replaced by 1 mL of NP-free DMEM supplemented with 1% FBS. RAW 264.7 cells were treated with 100 ng/mL lipopolysaccharide (LPS; Sigma, from *E. coli*) and C166 cells were treated with 10 ng/mL tumor necrosis factor alpha (TNF- $\alpha$ ; Peprotech) for another 24 h before harvest. RNA was isolated using Trizol (Thermo Fisher Scientific) and reverse-transcribed using the RevertAid First Strand cDNA Synthesis Kit (Thermo Fisher Scientific) to generate cDNA. qRT-PCR was performed on the ViiATM 7 System using TB SYBR Green Premix Ex Taq kit (Takara) following the manufacturer's instructions. Transcript levels were analyzed using the  $\Delta\Delta C_T$  method and normalized to the house-keeping gene glyceraldehyde 3-phosphate dehydrogenase (GAPDH). Gene expression was quantified using pre-designed primers purchased from Shanghai Rui Mian Bio Tech (see sequences below).

| Gene        | Forward sequence (5' to 3') | Reverse sequence (5' to 3') |
|-------------|-----------------------------|-----------------------------|
| Mouse GAPDH | ATGGTGAAGGTCGGTGTGAA        | GAGGTCAATGAAGGGGTCGT        |
| Mouse Traf6 | CTGACGGTAAAGTGCCCAA         | CTTCTGGAAAGGACGTTGGC        |
| Mouse Irak2 | TGAAAAGTATGCACCCGAC         | GCTTGGACGACATCTGCTTC        |
| Mouse Irf5  | TGGGTCAACGGGGAAAAGAA        | ACCCCTTCAGTGTACTTCCC        |
| Mouse Il1b  | TGGACCTTCCAGGATGAGGAC       | GTTTCATCTCGGAGCCTGTAGTG     |
| Mouse Tnfa  | GGTGCCTATGTCTCAGCCTCTT      | GCCATAGAAGTATGAGAGGGAG      |
| Mouse Mcp1  | CATCCACGTGTTGGCTCA          | GATCATCTTGCTGGTGAATGAGT     |

|             |                        |                        |
|-------------|------------------------|------------------------|
| Mouse Icam1 | AAACCAGACCCTGGAAGTGCAC | GCCTGGCATTTCAGAGTCTGCT |
| Mouse Vcam1 | ACAGACAGTCCCCTCAATGG   | TCCTCAAACCCACAGAGCT    |

**Animal model.** All animal procedures followed the guidelines stipulated by the Animal Experimentation Ethics Committee (AEEC) at The Chinese University of Hong Kong (CUHK) (AEEC No.19/259/GRF). ApoE<sup>-/-</sup> mice were purchased from the Jackson Laboratory and shipped to the CUHK Laboratory Animal Services Centre (LASEC). ApoE<sup>-/-</sup> male mice (5–6 weeks old) were fed with a high cholesterol diet (HCD, Research Diets rodent diet D12336) for 9–12 weeks to induce the formation of atherosclerotic plaques in the aorta and aortic root.

**Expression of miR-146a in cells or the aorta by qRT-PCR.** Relative expression of mature mmu-miR-146a was evaluated by using the QuantiMir RT kit (System Biosciences, RA420A-1) followed by qRT-PCR analysis according to the manufacturer's instruction, but with minor modifications. Briefly, the microRNAs were tagged with poly A tail, annealed with an oligo-dT adaptor, and converted into first strand cDNA. qRT-PCR was then performed with the following primers by using the TB SYBR Green Premix Ex Taq kit (Takara) in a StepOnePlus (Applied Biosystems): miR-146a forward, 5'-TAG GAA CTG AAT TCC ATG GGT T-3'; U6 forward, 5'-CTC GCT TCG GCA GCA CA-3', and a universal reverse primer supplied in the assay kit. The forward primer sequences were designed based on the miRbase database (www.mirbase.org). The analysis was performed at 95°C for 5 min, followed by 50 cycles at 95°C for 10 s and at 60°C for 10 s. Fluorescence signal was acquired at the end of the elongation step of every PCR cycle to monitor the increasing amount of amplified DNA. Transcript levels were analyzed using the  $\Delta\Delta CT$  method and normalized to U6. All the measurements were conducted in triplicates. Melting curve analysis was performed after the amplification phase to eliminate any nonspecific amplification or primer dimer formation.

**Cellular uptake by ICP-MS.** Pre-seeded in 24-well plates until the cell population reached ~70% confluence, cells were incubated with 0.3 mL of SPIONs (formulated at a concentration of 5 nM in complete DMEM) over different durations of time. After that, the cells were rinsed with phosphate-buffered saline (PBS) twice and trypsinized (0.25% Trypsin-EDTA, Gibco) for cell counting by a hemocytometer. The cells were further centrifuged at 8000 rpm for 5 min to form a pellet for further ICP-MS analysis of the Fe content associated with the cells. The cell pellets were digested in 0.3 mL of concentrated trace-metal grade HNO<sub>3</sub> (BDH ARISTAR) at RT overnight. After adding 5.7 mL of 2% HNO<sub>3</sub>, the Fe content of the resultant solution was measured by ICP-MS (Agilent 7900) after subtracting the background Fe content of untreated cells. Data are shown as the mean  $\pm$  standard error of the mean (SEM) from three biological replicates (i.e., 3 wells per treatment group).

**Pharmacological inhibition.** Seeded in 24-well plates, cells were pre-treated with 300  $\mu$ L of OptiMEM that contains fucoidan (50  $\mu$ g/mL, Santa Cruz) for 1 h. After removing the inhibitor-containing medium, 0.3 mL of serum-containing DMEM that contains the same inhibitor at the original concentration and 5 nM SPIONs were subsequently added to the cells. After 2 h of incubation, the SPIONs- and inhibitor-containing medium was removed, and the cells were rinsed with PBS. Cell pellets were harvested for ICP-MS analysis.

**Histology.** The aortic roots with the upper heart were embedded in Tissue-Tek optimal cutting temperature (OCT) compound (Sakura Finetek), stored at -80 °C, and serially sectioned into 10  $\mu$ m-thick slices. Cryo-sections were serially collected when the three aortic valves were recognized, generating a total of 50-60 slices per aortic root with the three leaflets of aortic valves. Other tissues like the lower heart, liver, spleen, and kidney were fixed in 10% buffered formalin for 48 h, then dehydrated in ethanol, cleared in xylene, and embedded in paraffin blocks. Paraffin-embedded tissues were cut into sections of 5  $\mu$ m thick by using a rotary microtome (Leica RM 2235) and mounted on Superfrost Plus™ Adhesion microscope slides (Thermo Scientific).

**Tissue-level distribution by confocal IF.** The aortic roots with the upper heart were collected from plaque-bearing mice and incubated in serum-containing DMEM which contains

5 nM Cy5-labeled PEG-SPIONs or miR-146a SPION for 2 h with gentle shaking (200 rpm). The aortic roots with the upper heart were embedded in OCT, stored at  $-80^{\circ}\text{C}$  for cryosection to verify the association of Cy5-SPIONs to the aortic macrophages and ECs in the plaque. After fixation, cryosections were blocked with 5% goat serum (Vector Laboratories) for 30 min, and then stained with PBS containing 5% goat serum and primary antibodies at  $4^{\circ}\text{C}$  overnight. The primary antibodies include mouse monoclonal primary antibody against CD68 (5  $\mu\text{g}/\text{mL}$ , ab31630, Abcam), mouse monoclonal primary antibody against ICAM-1 (4  $\mu\text{g}/\text{mL}$ , SC 107; Santa Cruz), and rabbit monoclonal primary antibody against CD204 (12.8  $\mu\text{g}/\text{mL}$ , ab123946; Abcam). CD68 and ICAM-1 were visualized with Alexa Fluor 532-conjugated goat anti-mouse secondary antibody (5  $\mu\text{g}/\text{mL}$ , A11002; Thermo Scientific), and CD204 was visualized with Cy3-conjugated goat anti-rabbit secondary antibody (5  $\mu\text{g}/\text{mL}$ , A10520; Thermo Scientific) at RT for 1 h. Next, the slides were stained by 1  $\mu\text{g}/\text{mL}$  DAPI for 10 min, washed and mounted with Antifade Mountant (P36980; Thermo Scientific) for visualization under a confocal laser scanning microscope (TCS SP8, Leica). The excitation wavelengths of DAPI, Alexa Fluor 532, and Cy3 are 405 nm, 532 nm, and 550 nm, respectively. The emission wavelength ranges of DAPI, Alexa Fluor 532 and Cy3 are 415–500 nm and 542–650 nm, 570–590 nm, respectively. To confirm the specificity of immunostaining and eliminate any bias of tissue autofluorescence, cryosections of the aortic root with the upper heart from healthy untreated C57BL/6 mice were similarly prepared and stained using the same primary and secondary antibodies as above, with the addition of rat monoclonal primary antibody against CD144 (20  $\mu\text{g}/\text{mL}$ , 14-1441-82; Invitrogen). CD144 was visualized with Alexa Fluor 647-conjugated goat anti-rat secondary antibody (4  $\mu\text{g}/\text{mL}$ , A21247; Thermo Scientific) under confocal imaging with excitation wavelength of 647 nm and emission wavelength range of 670–690 nm. Images were taken at the same laser settings for each fluorophore type (DAPI, AF 532, Cy3, and AF 647).

**Ex vivo cellular-level distribution by flow cytometry.** Aortas dissected from plaque-bearing mice were longitudinally cut and incubated with 5 nM Cy5-labeled PEG-SPIONs or miR-146a-SPIONs for 2 h with gentle shaking (200 rpm). After washed by PBS for 3 times, the aortas were placed in 1x Hanks' Balanced Salt Solution (HBSS; Sigma-Aldrich) containing collagenase I (450 U/mL; Worthington, collagenase IV (125 U/mL; Worthington, DNase I (40 U/mL; Worthington), and hyaluronidase (60 U/mL; Worthington) at  $37^{\circ}\text{C}$  with gentle shaking (200 rpm) for 1 h 25. Digested aortas were minced and filtered (70  $\mu\text{m}$ ; BD Biosciences) to generate a single-cell suspension and centrifuged at  $4^{\circ}\text{C}$  at 1800 rpm for 10 min. Pelleted cells were resuspended in FACS buffer (2 mM EDTA and 1% FBS in PBS). After incubating the single cell suspension in 1  $\mu\text{g}/\text{mL}$  Fc-block (BioLegend; 101302) and Live/Dead Fixable Aqua (Thermo Fisher Scientific; L34966) for 25 min, the cells were stained with different sets of antibodies (see below) at  $4^{\circ}\text{C}$  for 30 min in the dark. To probe the association of Cy5-labeled NPs to different aortic cell types, cells were washed and stained with CD45 (FITC; 30-F11; Ebiosciences; 11-0451-82), CD144 (BV605; BD Biosciences; 748261), CD204 (PE; Biolegend; 154709), CD64 (PE/Cy7; Biolegend; 139314), and Ly6C (PerCP-Cy5.5; Biolegend; 128012). Macrophages were gated as CD45<sup>+</sup>CD64<sup>+</sup> cells. ECs were gated as CD45<sup>+</sup>CD144<sup>+</sup> cells. Monocyte-macrophages were gated as CD45<sup>+</sup>CD64<sup>mid</sup>Ly6C<sup>hi</sup>. Samples were fixed in FluoroFix buffer (BioLegend) and kept at  $4^{\circ}\text{C}$  before analyzed by a flow cytometer (BD FACSAria™ Fusion. Data were analyzed by the FlowJo software (Tree Star).

**In vivo cellular-level distribution by flow cytometry.** Mice received an i.v. injection of Cy5-labeled miR-146a-SPIONs, Cy5-labeled miR-nc-SPIONs (10 mg/kg Fe and 1.5 mg/kg miR), Cy5-labeled miR-146a (1.5 mg/kg miR) complexed with Lipofectamine 3000 (60  $\mu\text{g}/\text{kg}$ , Invitrogen) encapsulated or free Cy5 dye at the same intensity of fluorescence via the tail vein. 2 h post-injection, the mice were sacrificed and perfused with PBS. Aorta was digested same as *ex vivo* preparation (see Supplementary Information). The dissected livers were sliced into small pieces and placed in RPMI 1640 medium (Thermo Fisher Scientific) containing collagenase IV (125 U/mL; Worthington) and DNase I (60 U/mL; Worthington) suspended in at  $37^{\circ}\text{C}$  with gentle shaking for 1 h. Livers were dissociated with the gentle MACS dissociator system (Miltenyi Biotec) and incubated at  $37^{\circ}\text{C}$  for another 15 min. Digested livers were minced and filtered (70  $\mu\text{m}$ ; BD Biosciences) to generate a single-cell suspension. Liver cells were treated with red blood cell (RBC) lysis buffer (BioLegend; 420302) for 10 min at RT. The staining and gating processes are same with *ex vivo* flow studies.

**Blood pharmacokinetics.** Mice received an intravenous (i.v.) injection of SPIONs at a concentration of 10 mg Fe/kg mouse via the tail vein. A total of 0.5 mL of blood was

withdrawn by cardiac puncture from mice that were sacrificed at different time points, and the blood samples were stored inside EDTA-coated tubes (Becton Dickinson). After centrifugation at 1500  $\times$ g for 10 min, 0.2 mL of the blood plasma in the supernatant was collected and lysed by adding 0.5 mL of trace metal grade 65% HNO<sub>3</sub>. The lysate was diluted to a 2% HNO<sub>3</sub> solution with Nanopure water and passed through a 0.2  $\mu$ m hydrophilic syringe filter for measurement of Fe content by ICP-MS. Blood collected from uninjected mice was used to account for the background Fe content. Data were fitted to a mono-exponential decay model by using the Prism Graphpad software.

**Ex vivo imaging of aorta.** Plaque-bearing ApoE<sup>-/-</sup> mice that were fed with a high-cholesterol diet for 12 weeks received an i.v. injection of Cy5-labeled PEG-SPIONs (10 mg/kg Fe), Cy5-labeled miR-146a-SPIONs (10 mg/kg Fe and 1.5 mg/kg miR), or free Cy5 dye at the same fluorescence intensities via the tail vein. 2 h post-injection, mice were sacrificed and perfused with 50 mL of PBS for 5–10 min each to remove any endogenous iron as much as possible. Ex vivo fluorescence imaging of the excised aorta was performed using an Odyssey infrared imaging system (excitation wavelength: 680 nm, emission wavelength:  $\geq$  700 nm). The images were digitised and analysed by the Odyssey imaging system software (no. 9201-500).

**Extraction of plasma proteins from SPIONs.** In a typical reaction of 60  $\mu$ L, 25 nM PEG-SPIONs or miR-146a-SPIONs were incubated in fresh blood plasma collected from plaque-bearing ApoE<sup>-/-</sup> mice that were fed with high-cholesterol diet for 12 weeks at 37°C for 2 h to allow for protein adsorption. Next, the protein-coated SPIONs were washed in PBS to remove unbound proteins by three rounds of centrifugation at 13500 rpm at 4°C and resuspended in PBS containing 0.05% v/v Tween 20 (Sigma). After pelleting the washed SPIONs, the supernatant was discarded, leaving 25  $\mu$ L of the SPIONs pellet. 10  $\mu$ L of Laemmli sample buffer (4 $\times$ ; Bio-Rad) and 5  $\mu$ L of 4.8 M dithiothreitol (DTT) were added to the NP pellet, followed by incubation at 70°C for 1 h with shaking to release the adsorbed proteins. After pelleting the SPIONs by centrifugation at 13500 rpm at 4°C, the supernatant containing the desorbed proteins was transferred to a new tube.

**Protein purification for proteomics analysis.** Desorbed proteins were mixed with 5 $\times$  loading buffer (Beyotime) and boiled for 5 min. After loading the prepared samples and protein marker into the wells of a 12% separating gel, the bands were resolved by PAGE at 80 kV for 15 min and then at 120 kV for another 15 min, the gel was stained with Coomassie blue dye (Beyotime). Three gel slices from each gel were cut into 1 mm<sup>3</sup> cubes, transferred to a 1.5 mL microcentrifuge tube, and washed with 500  $\mu$ L of 50 mM ammonium bicarbonate/acetonitrile (ACN) (1:1, v/v) solution until Coomassie blue disappeared. After discarding the supernatant, 500  $\mu$ L of ACN was added and the mixture was incubated for 10 min until the gel pieces became opaque and stuck together. After removing the ACN, the gel slices were rehydrated in 10 mM dithiothreitol (DTT)/50 mM ammonium bicarbonate, incubated at 56°C for 1 h, and the supernatant was discarded. For the rinsing step, 500  $\mu$ L of ACN was added, the mixture was incubated for another 10 min, and ACN was removed. Next, the gel slices were incubated in 50 mM iodoacetamide (IAA)/50 mM ammonium bicarbonate at RT in the dark for 1 h, and the IAA/ammonium bicarbonate was discarded. After repeating the rinsing step, the gel pieces were incubated in proteomics grade trypsin (Promega) digestion solution on ice for 45 min. Another 5-20  $\mu$ L of enzyme digestion solution was added, followed by overnight digestion at 37 °C. Finally, after adding 100  $\mu$ L of extraction solution (5% TFA-50% ACN-45% ddH<sub>2</sub>O) to each sample, the mixture was incubated in a 37°C water bath for 1 h and sonicated for another 5 min. The extract was transferred to a fresh microcentrifuge tube and extraction was repeated.

**Proteomics analysis with LC-MS/MS.** All reagents used for LC-MS/MS experiments were chromatography grade and bought from Thermo Fisher Scientific. The extracted peptides were lyophilized and resuspended in 10  $\mu$ L of 0.1% formic acid for separation using an Orbitrap Eclipse Mass Spectrometer (Thermo Fisher Scientific), equipped with a 150  $\mu$ m $\times$ 15 cm in-house made column packed with Acclaim PepMap RPLC C18 (1.9  $\mu$ m, 100 Å, Dr. Maisch GmbH). The organic gradient was driven by the Nanoflow UPLC system over 120 min using Buffer A (0.1% formic acid in water) and Buffer B (20% 0.1% formic acid in water - 80% acetonitrile) at a flow rate of 600 nL/min. The gradient was held from 4% to 8 % B for 3 min, from 8 % to 28% B for 86 min, from 28 % to 40% B for 20 min, from 40% to 95% B for 1 min and from 95% to 95% B for 10 min. Eluted peptides were directly sprayed into the mass

spectrometer. Ten MS/MS data-dependent scans were acquired simultaneously with one high-resolution (60000 at 400 m/z) full-scan mass spectrum to provide the amino acid sequence and mass-to-charge ratio for the selected peptide ions.

**LC-MS/MS spectral data analysis.** Raw MS files were analyzed and searched against the Uniprot-Mus musculus (Mouse) protein database based on the species of samples using MaxQuant (1.6.2.10) with the following parameters. Protein modifications were carbamidomethylation (C) (fixed), oxidation (M) (variable). Enzyme specificity was set as trypsin. Maximum missed cleavages were set as 2. Precursor ion mass tolerance was set as 20 ppm. MS/MS tolerance was set as 20 ppm. Only high confident identified peptides were chosen for protein identification analysis.

**Protein concentration.** 25  $\mu$ L of purified desorbed proteins or different concentrations of serially diluted bovine serum albumin (BSA, Pierce) were transferred into a 96-well plate. After adding 200  $\mu$ L of freshly prepared BCA Protein Assay working reagent (Pierce) to each well, the samples were incubated at 60°C for 30 min. Absorbance at 562 nm was measured by a Multiskan GO UV-absorbance microplate reader (Thermo Fisher Scientific). Protein concentrations were calculated by using BSA as a standard of calibration.

***In vivo* organ-level distribution by ICP-MS.** Mice received an i.v. injection of SPIONs at a concentration of 10 mg Fe/kg mouse via the tail vein. At different time points, mice were sacrificed and perfused with PBS for 5–10 min each to remove the endogenous iron as much as possible. The heart along with aorta and other major internal organs were excised, minced, and digested in 0.5 mL of 65% trace-metal grade HNO<sub>3</sub> over 2–3 d. The lysate was diluted to 2% HNO<sub>3</sub> solution with Nanopure water and passed through a 0.2  $\mu$ m hydrophilic syringe filter, and its Fe content was measured by ICP-MS. Tissues from uninjected mice were used to account for the background Fe content.

**Preparation of aorta samples for *in vivo* efficacy by qRT-PCR.** Mice were sacrificed 24 h after the last injection of SPIONs, when their intact aortas were harvested. The freshly harvested tissue was snap frozen in liquid nitrogen. Frozen tissue was ground with mortar and pestle and RNA was isolated using Trizol.

***En face* Oil Red O staining of intact aorta and aortic root sections.** Following different treatments, ApoE<sup>-/-</sup> mice were euthanized and perfused with PBS for 5–10 min. Heart with whole aorta was collected and dissected. Aortic arch and thoracic aorta were longitudinally opened and fixed in 10% formalin for 30 min. Whole aortas were rinsed with 70% isopropanol (Sigma-Aldrich), stained with freshly prepared 0.3% Oil Red O solution (Sigma-Aldrich) for 15 min. 6–8 cryosection slices were washed with Nanopure water for three times to remove the OCT, stained with ORO similarly to the aorta for 15 min, and mounted with aqueous mounting medium (glycerol jelly; Sigma-Aldrich) for visualization under a Nikon Ni-U microscope. The intact aortas were photographed using a CCD camera that was connected to a dissection microscope (Zeiss, Stemi 305). The aortic root sections were visualized under a Ti-E motorized inverted fluorescence microscope (Nikon) in bright-field mode. The red area covered by plaque and the total artery area were quantified using the NIH ImageJ software.

**Sirius Red staining of aortic root sections.** 6–8 cryosection slices were washed with Nanopure water for three times to remove the OCT and the slices were immersed in picro Sirius Red solution and stained for 60 min at RT. All the slices were rinsed quickly in 2 changes of acetic acid solution, washed in distilled water, dehydrated in ethanol, cleared in xylene, and mounted with DPX mountant. Sections were photographed using a Ti-E motorized inverted fluorescence microscope (Nikon) with the polarized-light mode. Data were further analyzed by Image J.

**Efficacy evaluation by confocal immunofluorescence.** The contents of macrophages (CD68) within the aortic root lesions and adhesion molecules (ICAM-1) on ECs were quantified by IF (see process above in the *ex vivo* tissue-level distribution part). Data were further analyzed by Image J.

**Efficacy evaluation by immunohistochemistry (IHC).** The content of vascular smooth muscle cells (SMCs) was quantified by IHC. 6–8 frozen slices from each mouse were washed with PBS three times to remove the OCT. After fixation with 4% PFA in PBS for 30 min, the sections were blocked with 2.5% horse serum (Vector Laboratories) at RT for 2 h and stained

with 2.5% horse serum containing anti- $\alpha$ -SMA rabbit antibody (65 ng/mL, ab150301, Abcam) at 4 °C overnight. After rinses with PBS, the sections were treated with 3% H<sub>2</sub>O<sub>2</sub> (Merck Millipore) for 10 min, rinsed again, and incubated with ~50  $\mu$ L of secondary antibodies (MP-7401-50; ImmPRESS HRP Polymer detection Kit; Vector Laboratories) for 30 min. The sections were developed by using 3,3'-diaminobenzidine (DAB) enzyme substrate (ImmPACTTM DAB, Vector Laboratories) for 4 min. All slides were counter-stained with Mayer's hematoxylin for 2 min, washed in distilled water, dehydrated in ethanol, cleared in xylene, and mounted with DPX mountant. Sections were photographed using a Ti-E motorized inverted fluorescence microscope (Nikon) with the bright-field mode. Data were further analyzed by Image J.

**Whole-transcriptome analysis with total RNA sequencing (RNA-Seq).** 24 h after the last injection in our efficacy studies, the aorta was harvested from each HCD fed mouse from four treatment groups (N=3 per group), including (i) untreated control, (ii) PEG-SPIONs, (iii) miR-146a-SPIONs, and (iv) miR-nc-SPIONs. The harvested aorta was snap frozen in liquid nitrogen, stored at -80 °C, and sent to the Beijing Genomics Institute (BGI) for RNA extraction, RNA library construction, and bioinformatic analysis. The mRNA was isolated from total RNA using oligo (dT) magnetic beads following the manufacturer's instructions for cDNA library construction. Double stranded cDNA was sequenced using the DNBseq platform. At least 20 million clean reads per sample on the DNBseq platform were generated for data analysis. Differential expressed transcript (DET) detection, gene ontology analysis of DET, and other analysis were performed using the Dr. Tom analysis platform (BGI). GO terms and DETs with corrected p values (Q values) < 0.05 were considered significantly enriched.

**Blood test and histological staining for *in vivo* toxicity.** About 0.5 mL of whole blood was collected from the mouse heart via an intracardiac puncture (using a 25-Gauge needle) under anaesthesia before sacrifice. The whole blood was left to sit at RT for 30 min and then centrifuged at 2,000  $\times$ g at 4°C for 10 min. About 200  $\mu$ L of blood serum was collected from the supernatant and sent to the PathLab Medical Laboratories (Hong Kong) on the same day for blood biochemistry analysis. The lower heart, liver, spleen, and kidney were fixed in 4% PFA overnight, embedded in paraffin, and cut into sections of 5  $\mu$ m thick. Paraffin-sections were deparaffinized in xylene (5 min  $\times$  3 times), rehydrated through a series of ethanol (100%, 90%, 70%; 3 min  $\times$  2 times at each ethanol concentration) as well as deionized water (MilliQ) (5 min  $\times$  5 times), and counterstained by hematoxylin and eosin (H&E; Sigma) for 2 min and 1 min, respectively. The stained sections were dehydrated in ethanol, cleared in xylene, and mounted with DPX mountant (Sigma) for visualization under a Ti-E motorized inverted fluorescence microscope (Nikon) in bright-field mode.

**Data processing and statistical analysis.** The Prism (GraphPad Software) and Excel software were used for data analysis and graph construction. To determine the statistical significance in the comparison of two groups, an unpaired two-tail t test was performed. To determine the statistical significance in the comparison of multiple groups, an unpaired one-way analysis of variance (ANOVA) was performed with Tukey's Test for post hoc analysis. Normality of sampling distribution of means was validated by Shapiro-Wilk test. Homogeneity of variance was validated by Bartlett's test. Results are considered significant at P < 0.05.



**Table S1. Delivery of NPs to the atherosclerotic plaques *via* i.v. injection in the literature.**

This table contains information from past publications that disclosed the values of NP delivery efficiency to atherosclerotic plaques in terms of %ID or %ID/g. Imaging studies that disclosed the delivery values in terms of fluorescence, photon, or radiance are not included because such values cannot be directly compared with the performance of our miR146a-SPION.

**Abbreviations:**

NPs: Nanoparticles

HD: Hydrodynamic diameter

HDL: High-density lipoprotein

MUDA: mercaptoundecanoic acid

| Year      | Type                                    | HD      | Organ           | Time point | Delivery Efficiency (% ID or % ID/g) | Animal model             |
|-----------|-----------------------------------------|---------|-----------------|------------|--------------------------------------|--------------------------|
| This work | miR-146a-coated iron oxide NPs          | 72.7 nm | Aorta and heart | 2 h        | 1.2% ID                              | ApoE <sup>-/-</sup> mice |
|           |                                         |         |                 |            | 8.9% ID/g                            |                          |
|           |                                         |         |                 | 24 h       | 0.5% ID                              |                          |
|           |                                         |         |                 |            | 4.1% ID/g                            |                          |
|           | PEG-coated iron oxide NPs               | 59.3 nm | Aorta and heart | 2 h        | 0.4% ID                              |                          |
|           |                                         |         |                 |            | 3.5% ID/g                            |                          |
|           |                                         |         |                 | 24 h       | 0.4% ID                              |                          |
|           |                                         |         |                 |            | 3.0% ID/g                            |                          |
| 2006 (2)  | VCAM-1 peptide-targeting iron oxide NPs | 38 nm   | Heart           | 6 h        | 0.90±0.18% ID/g                      | ApoE <sup>-/-</sup> mice |
| 2012 (3)  | Anti-Mrp14 antibody lipid NPs           | 83 nm   | Aorta           | 36 h       | 6% ID/g dry weight                   | ApoE <sup>-/-</sup> mice |
| 2013 (4)  | Dextran-coated iron oxide NPs           | 28 nm   | Heart           | 6 h        | 4.27±1.15% ID/g                      | ApoE <sup>-/-</sup> mice |
|           |                                         |         |                 | 24 h       | 1.73±0.1% ID/g                       |                          |
|           |                                         |         |                 | 48 h       | 1.41±0.05% ID/g                      |                          |
|           |                                         |         |                 | 72 h       | 1.15±0.03% ID/g                      |                          |
| 2013 (5)  | <sup>89</sup> Zr-dextran NPs            | 13.3 nm | Aorta           | 48 h       | 1.2±0.1% ID/g                        | ApoE <sup>-/-</sup> mice |
|           |                                         |         | Heart           |            | 1.2±0.2% ID/g                        |                          |
| 2014 (6)  | Anti-Lox-1 antibody iron oxide NPs      | 28.2 nm | Aorta           | 24 h       | 3.5% ID/g                            | ApoE <sup>-/-</sup> mice |
|           |                                         |         | Heart           |            | 0.5% ID/g                            |                          |
| 2015 (7)  | Simvastatin-loaded HDL NPs              | N/A     | Aorta           | 24 h       | 1.0% ID/g                            | ApoE <sup>-/-</sup> mice |

|              |                                                      |          |                      |      |                                                  |                          |
|--------------|------------------------------------------------------|----------|----------------------|------|--------------------------------------------------|--------------------------|
| 2016<br>(8)  | Viral macrophage inflammatory protein-II-polymer NPs | 15.8 nm  | Aortic arch          | 24 h | Early atherosclerosis (20 weeks) 6.12±0.88% ID/g | ApoE <sup>-/-</sup> mice |
|              |                                                      |          |                      |      | Late atherosclerosis (37 weeks) 8.88±1.75% ID/g  |                          |
| 2016<br>(9)  | HDL NPs                                              | 30 nm    | Aortic root and arch | 24 h | 0.07% ID                                         | ApoE <sup>-/-</sup> mice |
|              |                                                      | 40 nm    |                      |      | 0.05% ID                                         |                          |
|              |                                                      | 70 nm    |                      |      | 0.04% ID                                         |                          |
|              |                                                      | 70 nm    |                      |      | 0.03% ID                                         |                          |
| 2016<br>(10) | 11-MUDA -AuNPs                                       | 31.5 nm  | Heart                | 5 d  | 5% ID/g                                          | ApoE <sup>-/-</sup> mice |
| 2017<br>(11) | Hyaluronan NPs                                       | 32 nm    | Aorta                | 24 h | 6 week-HFD ~0.018% ID                            | ApoE <sup>-/-</sup> mice |
|              |                                                      |          |                      |      | 12 week-HFD ~0.017% ID                           |                          |
| 2019<br>(12) | SR-BI and CD36 targeting biomimetic NPs              | 122.1 nm | Aortic tree          | 4 h  | 1-dose: ~0.18% ID                                | ApoE <sup>-/-</sup> mice |
|              |                                                      |          |                      |      | 4-week treatment (twice a week): ~0.58% ID       |                          |
| 2020<br>(13) | CD44-targeting hyaluronan-based NPs                  | 122 nm   | Aorta                | 24 h | 1.7% ID/g                                        | ApoE <sup>-/-</sup> mice |

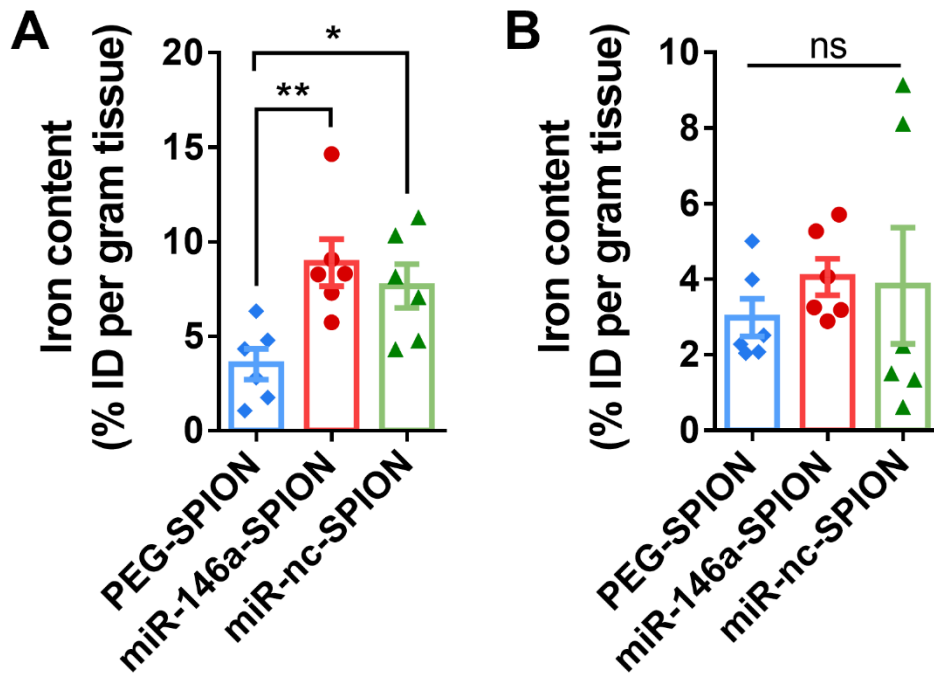

**Fig. S1.** ICP-MS measurements of the iron content in the aorta and heart (sites of plaques for ApoE<sup>-/-</sup> mice) in terms of %ID per gram tissue. (A) 2 h post-injection and (B) 24 h post-injection. The typical total weight of the aorta and heart of plaque-bearing ApoE<sup>-/-</sup> mice is 120 mg. The same data plotted in terms of %ID tissue are found in Fig. 2A (2 h post-injection) and Fig. S22 (24 h post-injection). Data are presented as means  $\pm$  SEM. Statistical significance was calculated by one-way ANOVA with Tukey's Test for post-hoc analysis. \*P < 0.05, \*\*P < 0.01, ns: not significant (P > 0.05). n = 6; across 2 experiments.

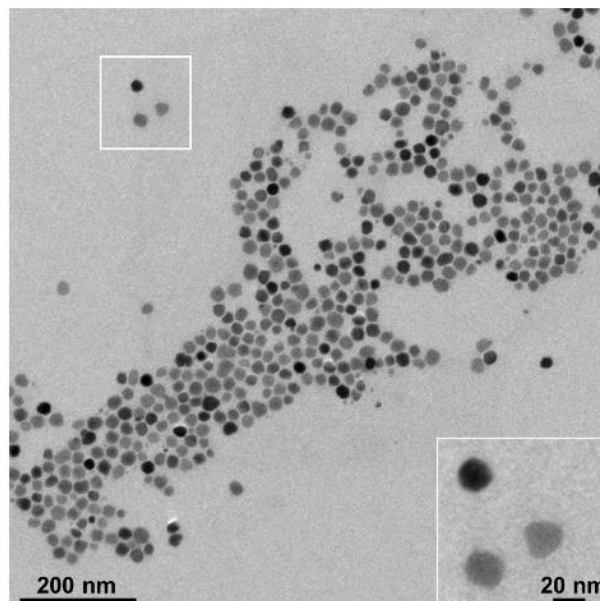

**Fig. S2.** Representative TEM images of PEG-SPIONs show a core diameter of ~20 nm.

**Table S2. List of oligonucleotide sequences and their associated applications**

| Name         | Sequence                                                                                                                              | Associated applications                                                                                                           | Molecular weight (Da) |
|--------------|---------------------------------------------------------------------------------------------------------------------------------------|-----------------------------------------------------------------------------------------------------------------------------------|-----------------------|
| miR-146a     | 5'-/5AmMC6/rU*rG*rA* rG*rA*rA*<br>rC*rU*rG* rA*rA*rU* rU*rC*rC* rA*rU*rG*<br>rG*rG*rU* rU-3'                                          | Cytotoxicity test; ICP-MS; qRT-PCR; <i>In vivo</i> efficacy studies                                                               | 7559.7                |
| Cy5-miR-146a | 5'-/5AmMC6/rU*rG*rA* rG*rA*rA*<br>rC*rU*rG* rA*rA*rU* rU*rC*rC* rA*rU*rG*<br>rG*rG*rU* rU/3Cy5Sp/-3'                                  | Confocal microscopy; <i>Ex vivo</i> fluorescence imaging; <i>In vivo</i> flow cytometry; quantitation of loading density of miRNA | 8230.4                |
| miR-nc       | 5'-/5AmMC6/rU*rU*rU* rG*rU*rA*<br>rC*rU*rA* rC*rA*rC* rA*rA*rA* rA*rG*rU*<br>rA*rC*rU* rG-3'                                          | Cytotoxicity test; ICP-MS; <i>In vitro</i> cellular uptake; qRT-PCR; <i>In vivo</i> efficacy studies                              | 7487.7                |
| Cy5-miR-nc   | 5'-/5AmMC6/rU*rU*rU* rG*rU*rA*<br>rC*rU*rA* rC*rA*rC* rA*rA*rA* rA*rG*rU*<br>rA*rC*rU* rG/3Cy5Sp/-3'                                  | Confocal microscopy; <i>In vivo</i> flow cytometry; quantitation of loading density of miRNA                                      | 8158.3                |
| abasic       | 5'/5AmMC6/T*T*T* T*T*T* T*T*T*<br>T*/idSp*/idSp*/ /idSp*/idSp*/idSp/*<br>/idSp*/idSp*/idSp*/ /idSp*/idSp*/idSp/*<br>/3dSp/-3'         | ICP-MS                                                                                                                            | 5657.6                |
| Cy5-abasic   | 5'/5AmMC6/T*T*T* T*T*T* T*T*T*<br>T*/idSp*/idSp*/ /idSp*/idSp*/idSp/*<br>/idSp*/idSp*/idSp*/ /idSp*/idSp*/idSp/*<br>/idSp//3Cy5Sp/-3' | <i>In vivo</i> flow cytometry; quantitation of loading density of DNA                                                             | 6328.3                |

NOTE: In each abasic oligonucleotide, more than half of the bases (12 out of 22) contains neither a nucleobase; rather, the abasic sites only contain the negatively charged phosphate and ribose. It is challenging to synthesize a purely abasic oligonucleotide because the absence of ultraviolet light-absorbing nucleobases renders subsequent purification by liquid chromatography infeasible.

/5AmMC6/: 5' Amino Modifier C6

/3Cy5Sp/: 3' Cy5<sup>TM</sup>-Sp

/idSp/: Int dSpacer

/3dSp/: 3' dSpacer

\*: phosphorothioate

**Table S3. Physicochemical characterization of different SPION types (in both Cy5-labeled and nonfluorescent forms) by dynamic light scattering (DLS)**

| Sample                     | In H <sub>2</sub> O |       | In DMEM+10% FBS after 24 h at 37 °C |       | ζ-Potential In 1 mM KCl (mV) |
|----------------------------|---------------------|-------|-------------------------------------|-------|------------------------------|
|                            | HD (nm)             | PDI   | HD (nm)                             | PDI   |                              |
| PEG-SPION                  | 59.3 ± 0.7          | 0.200 | 72.1 ± 3.1                          | 0.183 | -8.2 ± 0.8                   |
| miR-146a-SPION             | 72.7 ± 2.5          | 0.182 | 85.4 ± 3.6                          | 0.237 | -21.8 ± 1.8                  |
| miR-nc-SPION               | 76.6 ± 0.9          | 0.217 | 85.2 ± 7.0                          | 0.246 | -16.1 ± 2.7                  |
| Abasic-SPION               | 70.7 ± 4.9          | 0.126 | 75.8 ± 1.9                          | 0.192 | -18.8 ± 3.7                  |
| Cy5-labeled PEG-SPION      | 66.6 ± 3.4          | 0.137 | 79.2 ± 2.4                          | 0.290 | -8.8 ± 1.4                   |
| Cy5-labeled miR-146a-SPION | 79.3 ± 1.2          | 0.175 | 86.4 ± 3.4                          | 0.207 | -14.0 ± 0.9                  |
| Cy5-labeled miR-nc-SPION   | 82.3 ± 0.9          | 0.226 | 87.6 ± 3.5                          | 0.237 | -13.1 ± 1.2                  |
| Cy5-labeled Abasic-SPION   | 73.7 ± 2.9          | 0.219 | 80.2 ± 3.3                          | 0.276 | -14.9 ± 3.9                  |

HD refers to hydrodynamic diameter (HD) of in water at RT or upon incubation in Dulbecco's Modified Eagle Medium (DMEM) containing 10% fetal bovine serum (FBS) at 37°C for 24 h. PDI refers to the polydispersity index. Of all NP types tested, the size distribution is homogeneous, as evidenced by their small polydispersity indices (<0.25). Upon incubation in DMEM containing 10% FBS, the hydrodynamic size of the SPIONs increases by 5–13 nm, suggesting serum adsorption without evident aggregation. The increased hydrodynamic size (from ~59 nm to ~75 nm) and more negative surface charge (from -8 mV to -20 mV) indicate attachment of oligonucleotides to the surface of PEG-SPIONs to form miRNA-conjugated SPIONs. There are 275 dyes on Cy5-labeled miR-146a-SPIONs, 263 dyes on Cy5-labeled miR-nc-SPIONs, and 217 dyes on Cy5-labeled PEG-SPIONs. There are 352 dyes on Cy5-labeled abasic-SPIONs, a higher loading than that of miR-146a-SPIONs possibly because the lower molecular weight of abasic oligonucleotides (Table S2) facilitates denser loading of oligonucleotides to the SPION core. Cy5 conjugation only led to a ~10 nm increase in hydrodynamic size for all SPION types tested.

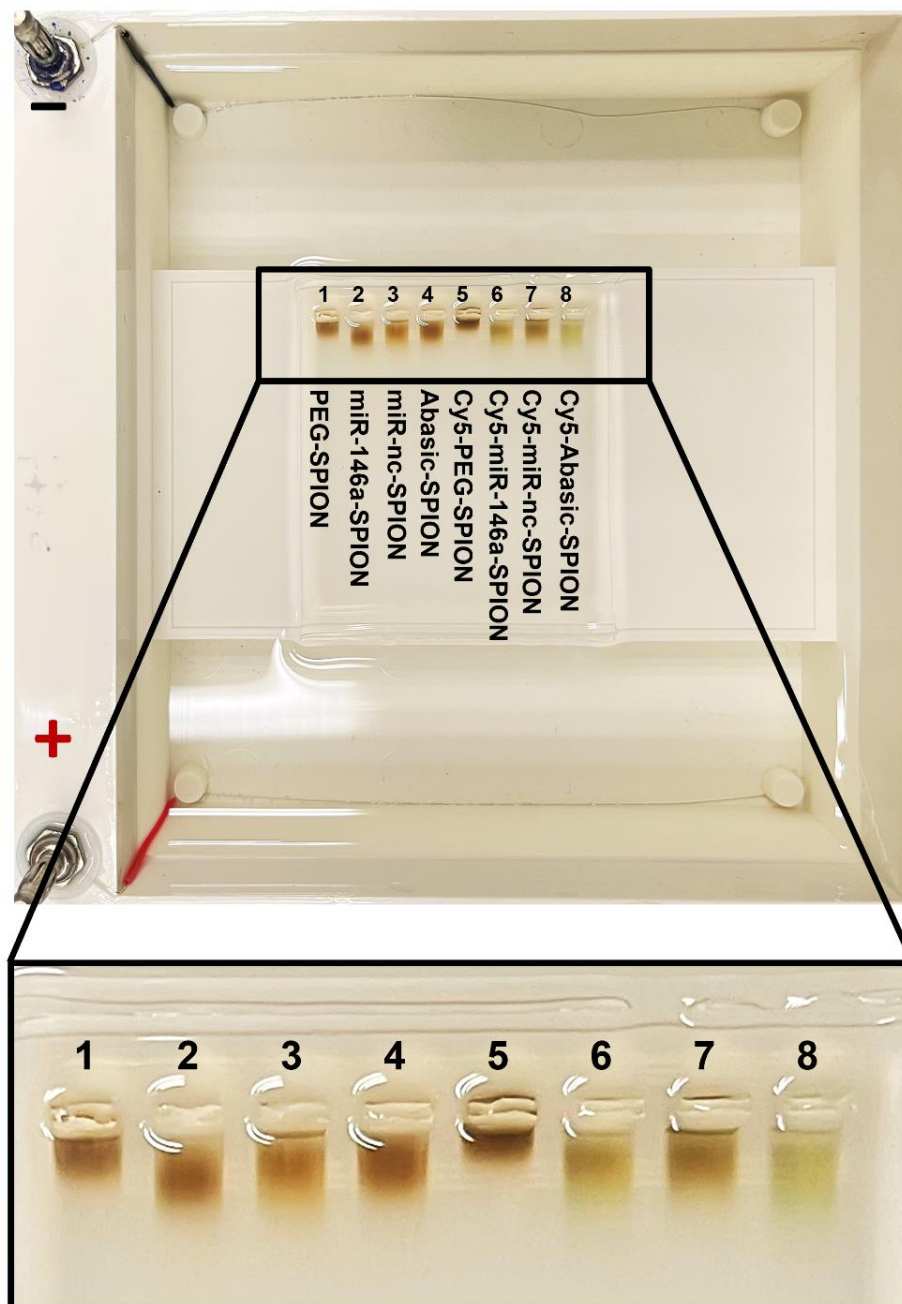

**Fig. S3. Agarose gel electrophoresis of different SPION types.** Faster migration of miR-146a-SPIONs, miR-nc-SPIONs, and abasic-SPIONs in both nonfluorescent and Cy5-labeled forms, toward the positive electrode indicates their more negative surface charge than PEG-SPIONs. These data agree with the zeta potential data in Table S3 and suggest oligonucleotide attachment on the miR-SPIONs. Top: original gel. Bottom: Enlargement of the boxed region in the top panel.

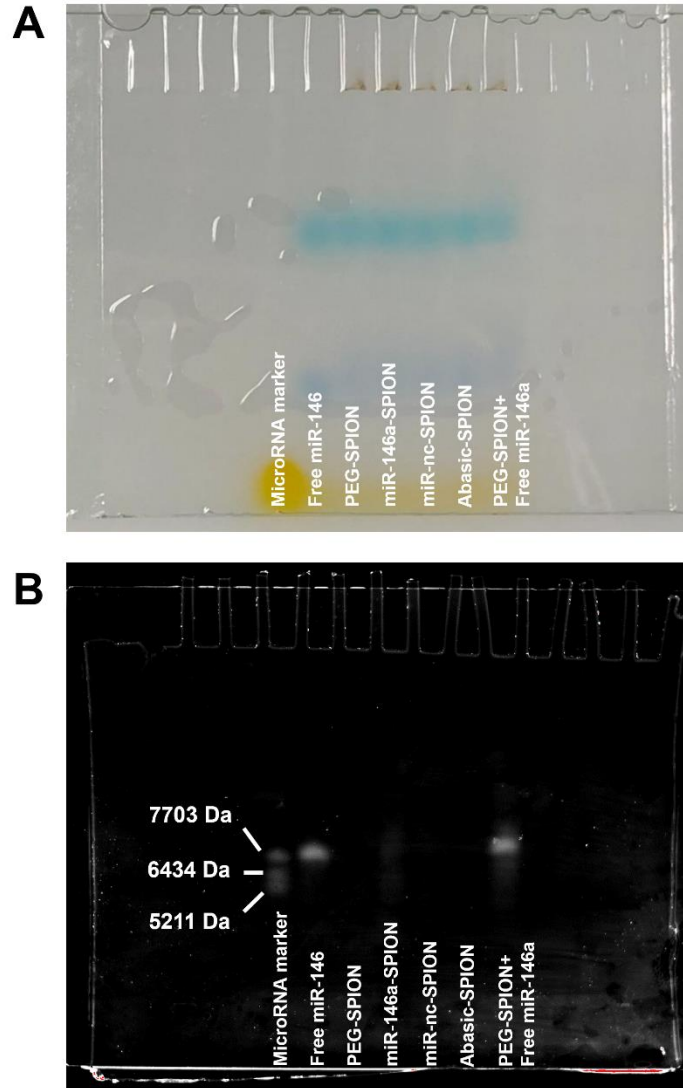

**Fig. S4. Denaturing polyacrylamide gel electrophoresis (PAGE) of different SPION types.** From left to right, the samples are a commercial microRNA marker, free miR-146a, PEG-SPIONs, miR-nc-SPIONs, miR-146a-SPIONs, and abasic-SPIONs, and a physical mixture of PEG-SPIONs and free miR-146a. **(A)** After electrophoresis, optical imaging reveals brown color only in the loading wells of all SPION types but not free miR-146a or the RNA ladder. This result indicates that SPIONs remain in the loading wells without traversing down the PAGE gel. **(B)** The PAGE gel from the gel cassette and immersed it in a SYBR Gold Gel Staining solution to reveal any nucleic acid bands in the gel. Fluorescence imaging reveals bands only in the lanes of miRNA ladder, free miR-146a, and the physical mixture of PEG-SPIONs and free miR-146a; these bands are absent for PEG-SPIONs, miR-SPIONs, or abasic-SPIONs. (Removal of the gel from the cassette inevitably led to the loss of all types of SPIONs originally in the loading wells.) Because only free oligonucleotides (not SPION-attached oligonucleotides) are small enough to move down the gel, we conclude that the oligonucleotides are conjugated to the SPION for miR-146a-SPIONs, miR-nc-SPIONs, and abasic-SPIONs.) The molecular weight of miR-146a (phosphorothioate backbone) is 7559.9 Da, closer to that of the 25-base miRNA (phosphodiester; 5'AGAGCAGUGGCUGGUUGAGAUUUAA 3'; MW: 7702.9 Da) than that of the 21-base miRNA (phosphodiester; 5'AGCAGUGGCUGGUUGAGAUUU 3'; MW: 6434.1 Da) as part of the miRNA marker. The 17-base miRNA in the miRNA marker is 5'CAGUGGCUGGUUGAGAU 3'; MW: 5211.3 Da).



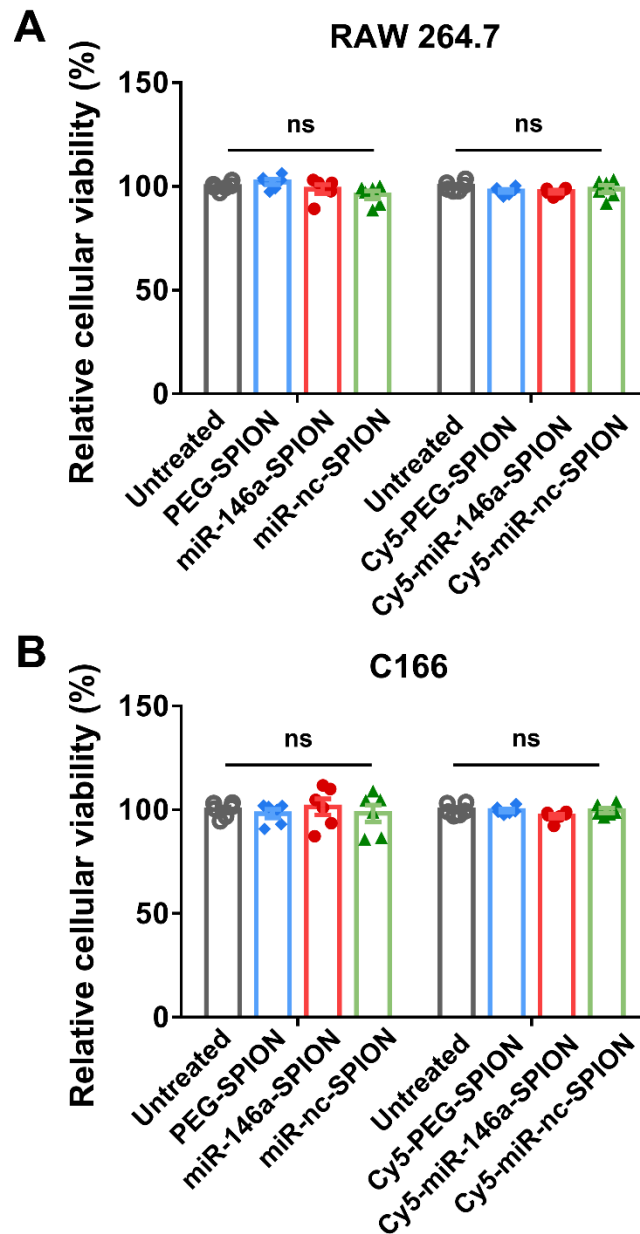

**Fig. S5. Cytotoxicity of PEG-SPIONs and miR-SPIONs.** (A) RAW 264.7 macrophages and (B) C166 endothelial cells were incubated with 5 nM PEG-SPIONs (blue), miR-146a-SPIONs (red), and miR-nc-SPIONs (green) in DMEM with 10% FBS for 24 h. By the alamarBlue assay, the treated cells remain largely viable after incubation with all types of NPs tested. Data are presented as mean  $\pm$  SEM. Statistical significance was calculated by one-way ANOVA with Tukey's Test for post-hoc analysis. ns: not significant ( $P > 0.05$ ).  $n = 6$  per group, across 1 experiment.

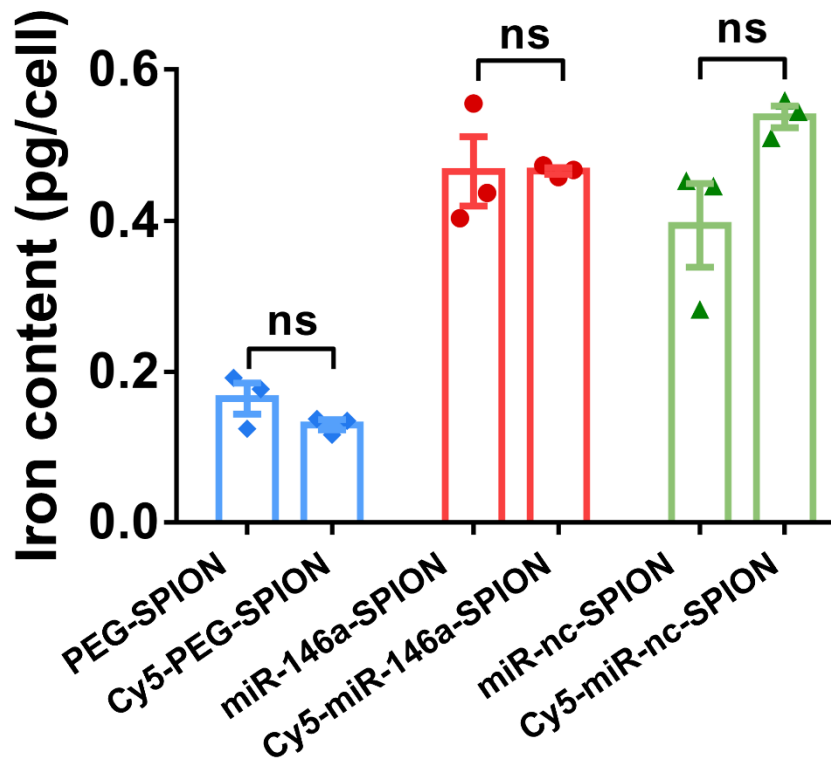

**Fig. S6. Cellular uptake of different SPION types by ICP-MS measurements.** Fluorescence labeling by Cy5 dye molecules did not affect the uptake of PEG-SPIONs (blue), miR-146a-SPIONs (red), or miR-146a-SPIONs (green) by RAW 264.7 cells after 2 h of incubation. Data are presented as mean  $\pm$  SEM. Statistical significance was calculated by Student's t test, ns: not significant ( $P > 0.05$ ).  $n=3$  per group, across 1 experiment.

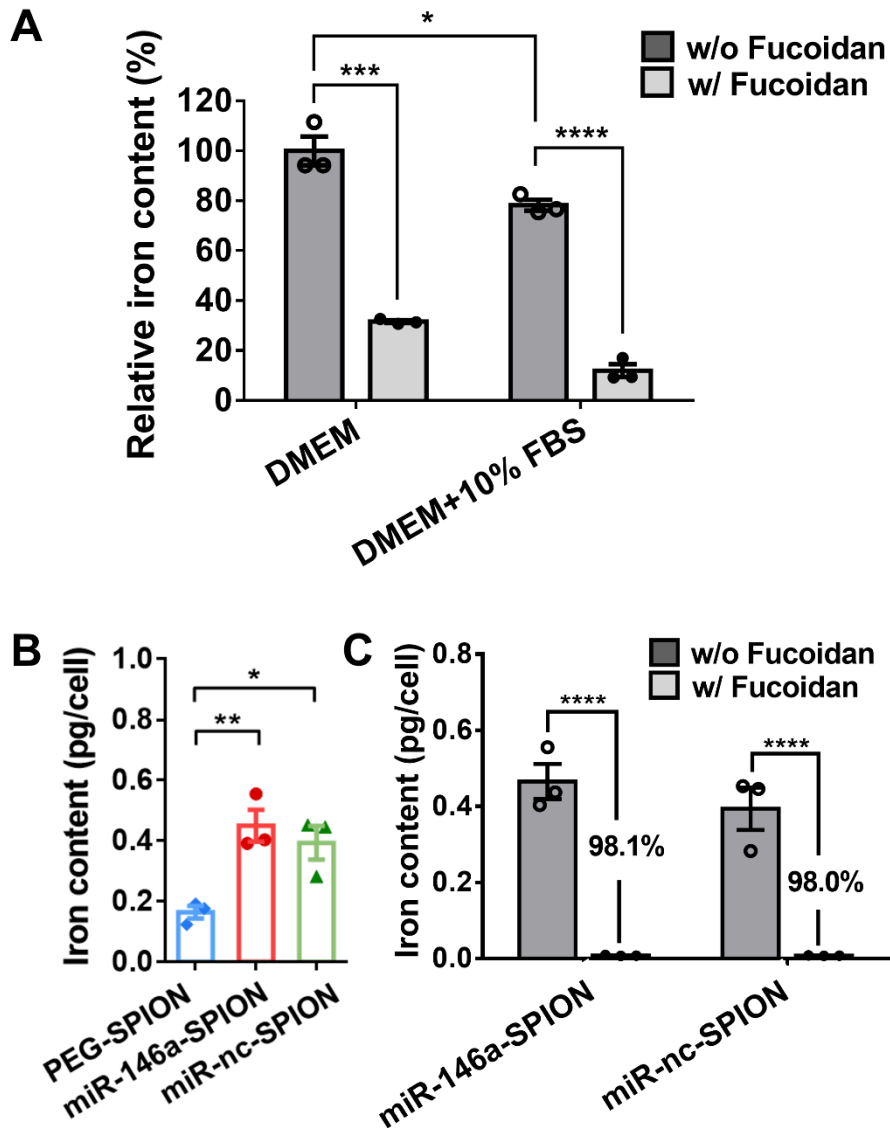

**Fig. S7. Effect of serum adsorption on the cellular uptake of miR-146a-SPIONs via SR-A.** (A) *In vitro* cellular uptake of miR-146a-SPIONs by RAW 264.7 macrophages after 2 h of incubation in DMEM with or without 10% fetal bovine serum (FBS) by ICP-MS-measurements. Pretreatment of fucoidan significantly reduced the uptake of miR-146a-SPIONs by RAW 264.7 cells in both serum-containing and serum-free medium. Data are presented as mean  $\pm$  SEM. Statistical significance was calculated by Student's t-test. \* $P < 0.05$ , \*\*\* $P < 0.001$ , \*\*\*\* $P < 0.0001$ .  $n = 3$  cell samples per group, across 1 experiment. (B) *In vitro* uptake of PEG-SPIONs (blue), miR-146a-SPIONs (red), and miR-nc-SPIONs (green) by RAW 264.7 macrophages by ICP-MS-measurements. Data are presented as mean  $\pm$  SEM. Statistical significance was calculated by one-way ANOVA with Tukey's Test for post-hoc analysis. \* $P < 0.05$ , \*\* $P < 0.01$ .  $n = 3$  cell samples per group, across 1 experiment. (C) Pretreatment of fucoidan significantly reduced the uptake of miR-146a-SPIONs and miR-nc-SPIONs by RAW 264.7 cells after 2 h of incubation. Data are presented as mean  $\pm$  SEM. Statistical significance was calculated by Student's t-test. \*\*\*\* $P < 0.0001$ .  $n = 3$  cell samples per group, across 1 experiment. Collectively, these results indicate that the serum protein corona did not severely reduce the cellular uptake of miR-SPIONs and targeting of SR-A.

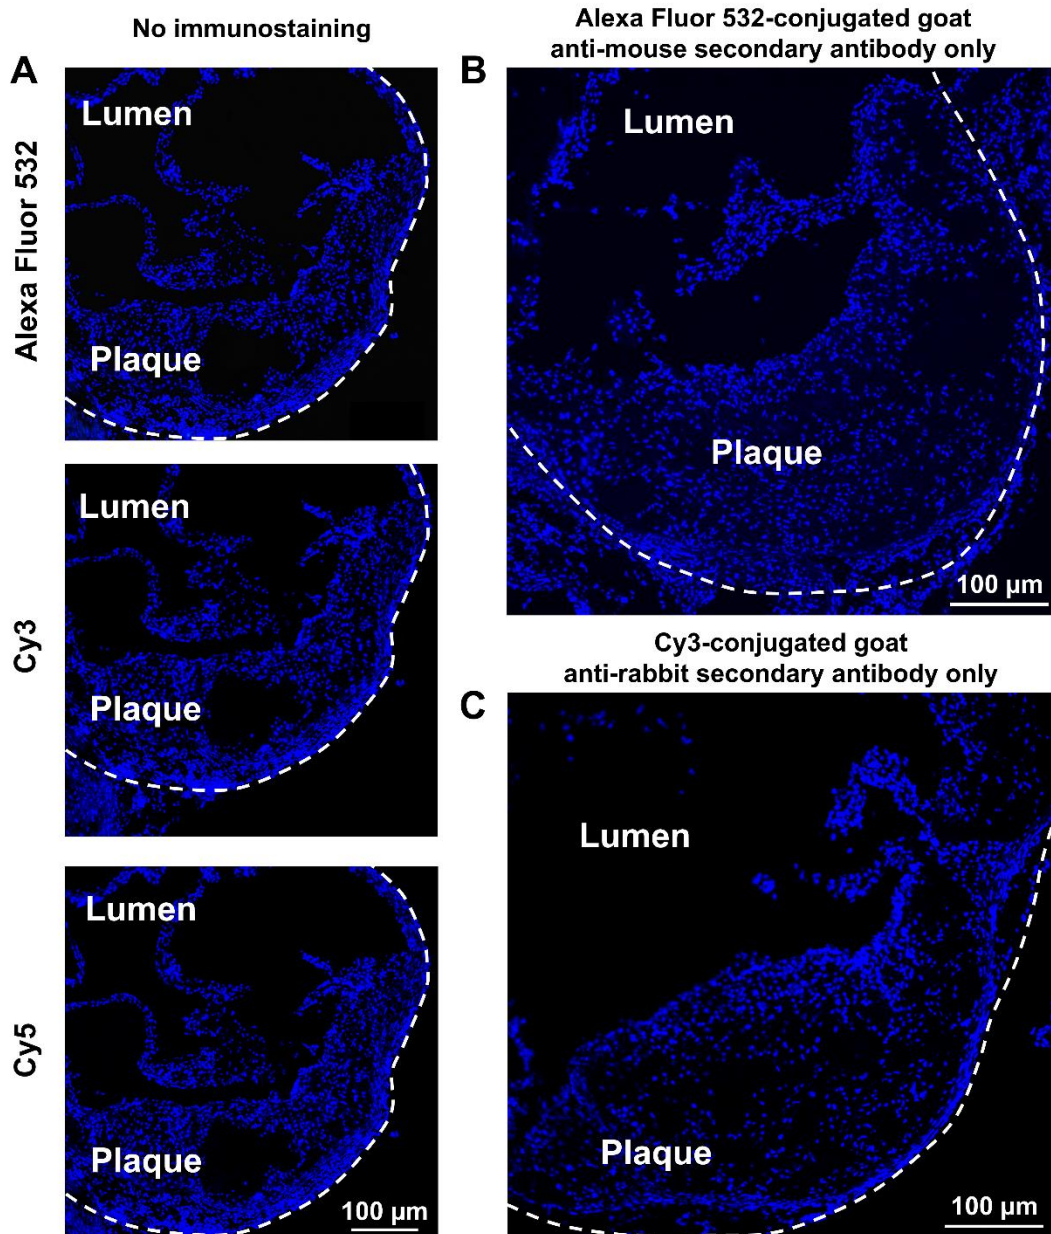

**Fig. S8. Staining controls of the aortic root of uninjected plaque-bearing ApoE<sup>-/-</sup> mice fed with high-cholesterol diet (HCD) for 12 weeks.** (A) Representative confocal immunofluorescence (IF) images of aortic root tissue sections do not emit detectable tissue autofluorescence in the Alexa Fluor 532, Cy3 (both dyes for labeling the secondary antibodies), or Cy5 wavelength (dye for labeling all SPION types tested). (B–C) Representative confocal IF images of aortic roots were stained with (B) Alexa Fluor 532-conjugated goat anti-mouse secondary antibody or (C) Cy3-conjugated goat anti-rabbit secondary antibody, but without primary antibodies against the marker of the plaque [e.g., ICAM-1 for endothelial cells (ECs) and CD68 for macrophages]. No Alexa Fluor 532 or Cy3 fluorescence was detected in these sections under imaging conditions that were identical to those shown in Fig. 1C, Fig. 2B, and Fig. 4A–B of the main text. These data support the specificity of the IF staining data in Fig. 1C, Fig. 2B, and Fig. 4A–B and eliminate potential bias in interpretation of the confocal IF images. Blue: DAPI, cell nucleus. White dotted lines indicate the border of the vascular wall.

## Cy5-PEG-SPION

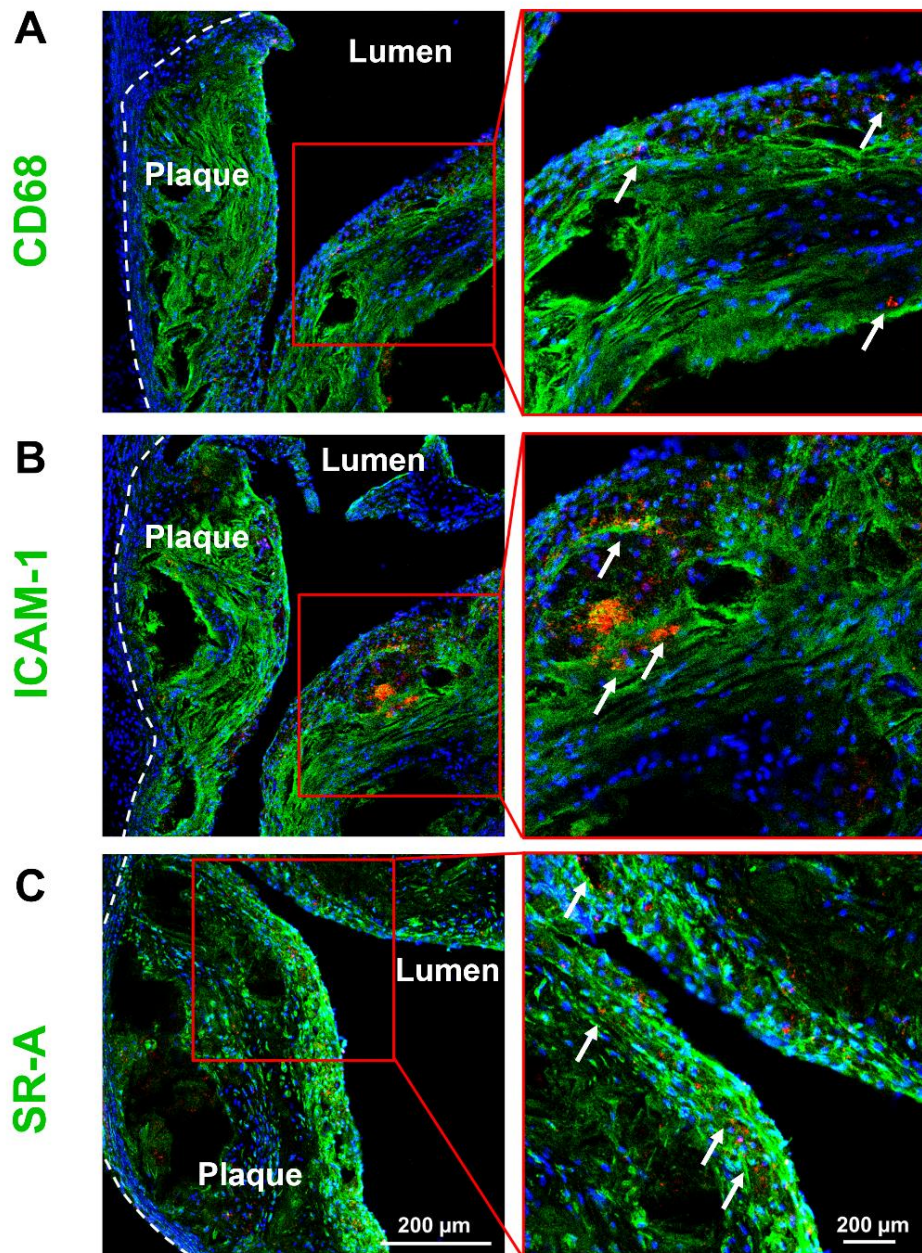

**Fig. S9.** *Ex vivo* binding of PEG-SPIONs to ECs and macrophages in the atherosclerotic plaque of *ApoE*<sup>-/-</sup> mice after 2 h of incubation. Representative confocal images show *ex vivo* association of Cy5-labeled PEG-SPIONs (red; with white arrows) to (A) macrophages, (B) ECs, and (C) SR-A in atherosclerotic plaques from the aortic root. Green pseudo color: CD68 (macrophages), ICAM-1 (ECs), or SR-A; Blue: DAPI. White dotted lines indicate the border of the vascular wall. The right panel shows the enlargement of the red boxed area in the left panel.

## Cy5-miR-146a-SPION

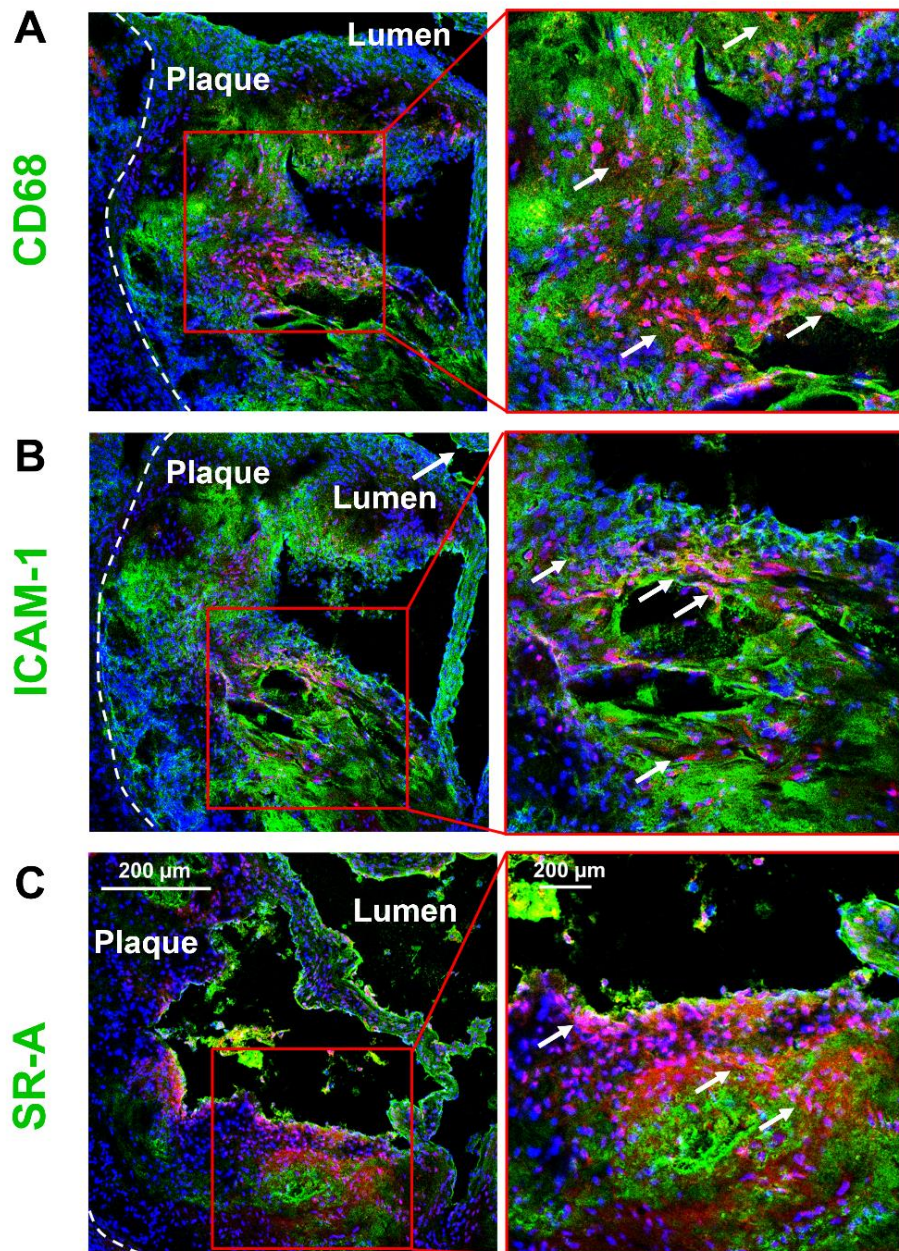

**Fig. S10. Ex vivo binding of miR-146a-SPIONs to ECs and macrophages in the atherosclerotic plaque of ApoE<sup>-/-</sup> mice after 2 h of incubation.** Representative confocal images show *ex vivo* association of Cy5-labeled miR-146a-SPIONs (red; with white arrows) to (A) macrophages, (B) ECs, and (C) SR-A in atherosclerotic plaques from the aortic root. Green pseudo color: CD68 (macrophages), ICAM-1 (ECs) or SR-A; Blue: DAPI. White dotted lines indicate the border of the vascular wall. The right panel shows the enlargement of the red boxed area in the left panel.

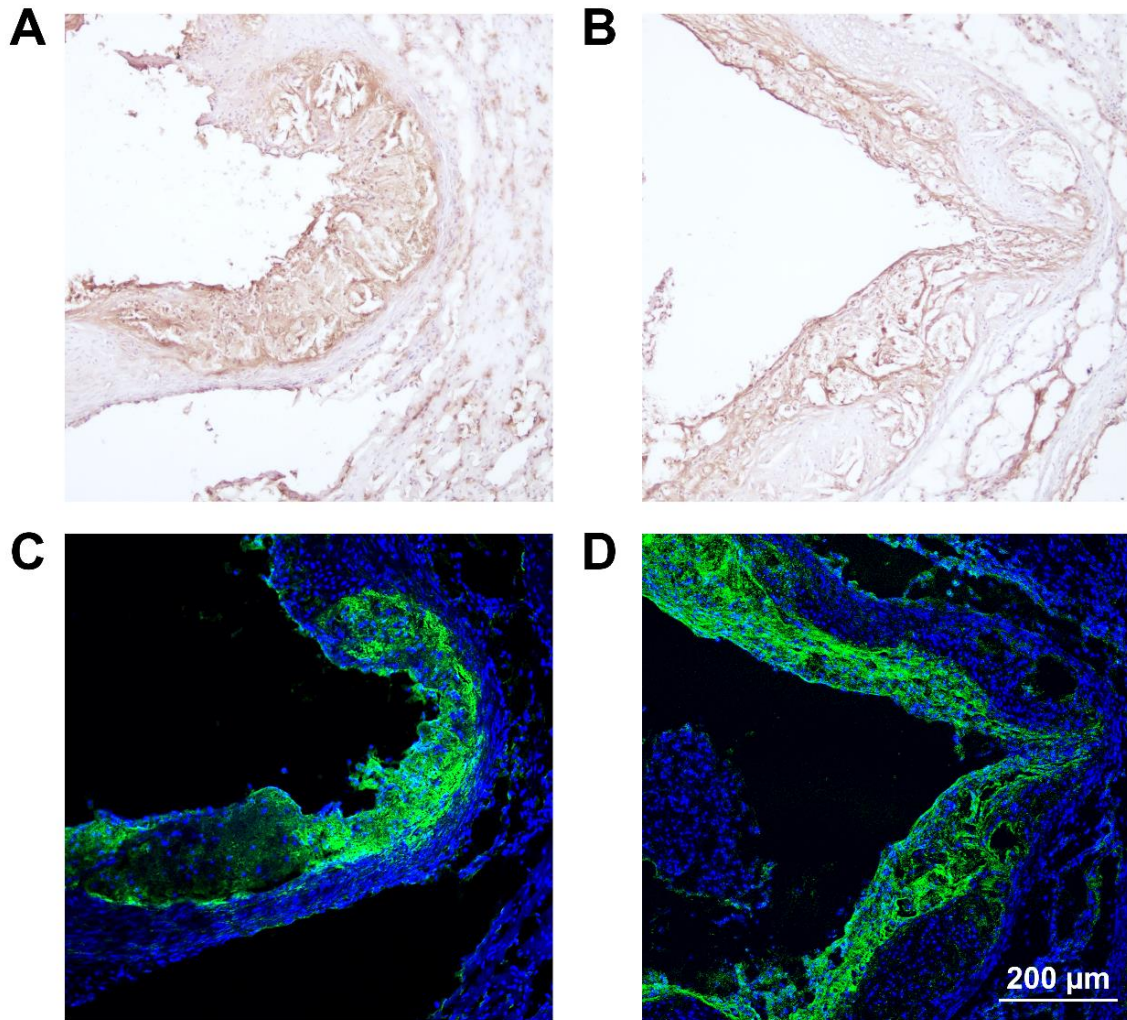

**Fig. S11. Staining of ICAM-1-expressing regions of the atherosclerotic plaque of  $ApoE^{-/-}$  mice that were fed with HCD for 12 weeks.** Representative (A) (B) immunohistochemistry (IHC) images and (C) (D) confocal IF images of serial sections of the aortic roots from two different uninjected mice reveal consistent ICAM-1-positive signals (brown in IHC images; green pseudo color in confocal images). These data further bolster the validity of the IF signals in Fig. 1C and Fig. 4B of the main text and Fig. S9–10 in SI. These data also eliminate any potential bias due to tissue autofluorescence. Blue: DAPI.

### Confocal IF staining controls from non-atherosclerotic untreated C57BL/6 mice

We confirmed that the aortic root tissue sections collected from non-atherosclerotic untreated C57BL/6 mice do not emit detectable autofluorescence in the Alexa Fluor 532 or Alexa Fluor 647 wavelengths (Fig. S12A). For these studies, we used Alexa Fluor 532-tagged secondary antibodies for labeling ICAM-1 (marker for inflamed ECs) and CD68 (marker for macrophages) and Alexa Fluor 647-tagged secondary antibodies for labeling CD144 (vascular endothelial (VE)-cadherin, a marker of endothelium). We also could not detect fluorescence when tissue sections from uninjected mice were stained with fluorescently labeled secondary antibodies only (without primary antibodies) as negative control (Fig. S12B).

Importantly, in aortic root sections collected from non-atherosclerotic untreated C57BL/6 mice, we detected no ICAM1 or CD68-positive regions by both primary and secondary antibodies because normal blood vessels should not express ICAM1 or contain CD68-expressing macrophages (Fig. S13A–B). To confirm that the ICAM1 and CD68 signals were undetectable, we performed an extra positive control experiment by staining the aortic root tissue sections with both primary and secondary antibodies against CD144 to verify the integrity of the endothelium. Confocal imaging revealed a thin layer of CD144-positive (red pseudo color) signals along the healthy endothelium and the autofluorescence of elastic lamina (green) on the plaque border (Fig. S13C). Collectively, these data empower us to eliminate bias of tissue autofluorescence or antibody specificity in our confocal IF data on plaque-bearing aortic roots.

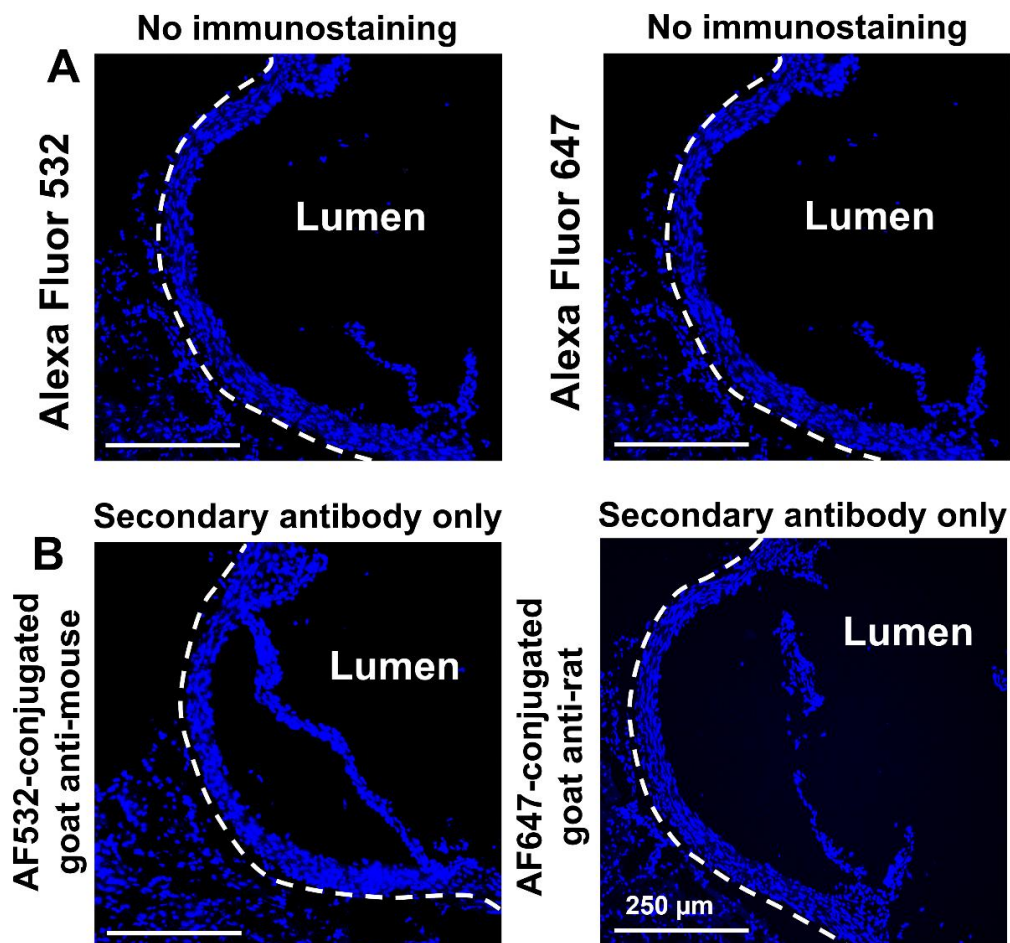

**Fig. S12. Staining controls of the aortic root of healthy C57BL/6 mice without immunostaining or stained using secondary antibody only.** (A) Representative confocal immunofluorescence (IF) images of aortic root tissue sections do not emit detectable tissue autofluorescence in the Alexa Fluor (AF) 532 or AF647 wavelengths. (B) Representative confocal IF images of aortic roots were stained with AF532-conjugated goat anti-mouse secondary antibody or AF647-conjugated goat anti-rat secondary antibody, but without primary antibodies against the marker of plaque (e.g., CD68 for macrophages and ICAM-1 for inflamed ECs) or the marker of endothelium (e.g., CD144 for VE-cadherin). Blue: DAPI.



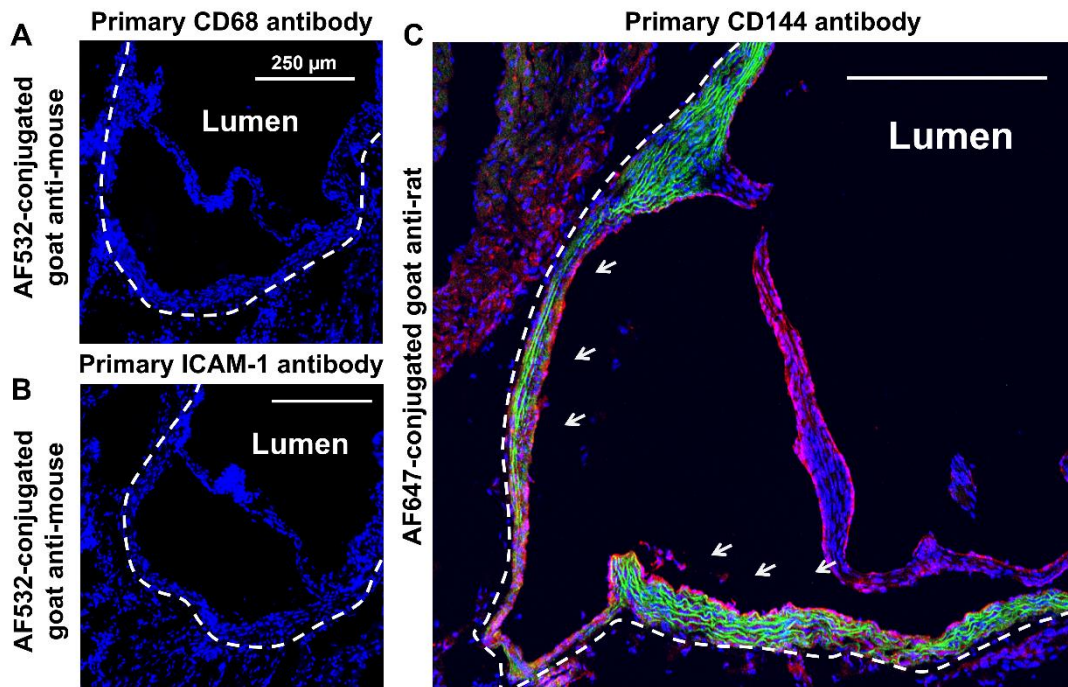

**Fig. S13. Staining controls of the aortic root of healthy C57BL/6 mice.** Representative confocal IF images of aortic roots were stained with primary antibodies against the marker of the plaque: **(A)** CD68 for macrophages, **(B)** ICAM-1 for inflamed ECs, or **(C)** CD144 for VE-cadherin. Their corresponding secondary antibodies are AF532-conjugated goat anti-mouse secondary antibody for CD68 and ICAM-1 as well as AF647-conjugated goat anti-rat secondary antibody for CD144. No AF532 fluorescence was detected in these normal aortic root sections under imaging conditions that were identical to those used for detecting CD68 and ICAM-1 in the plaque-bearing aortic root sections (Fig. 1C, Fig. 2B and Fig. 4A–B). As positive control, confocal imaging still revealed a thin layer of CD144-positive region along the healthy endothelium. Collectively, these data verify the intact endothelium structure in healthy mice and empower us to eliminate any bias of tissue autofluorescence or antibody specificity in our confocal IF data on plaque-bearing aortic roots. Blue: DAPI. Green: Autofluorescence of elastic lamina on the plaque border (excitation wavelength: 488 nm; emission wavelength: 500–520 nm). Red: CD144 VE-cadherin. White dotted lines indicate the border of the vascular wall. White arrows indicate the thin layer of endothelium.

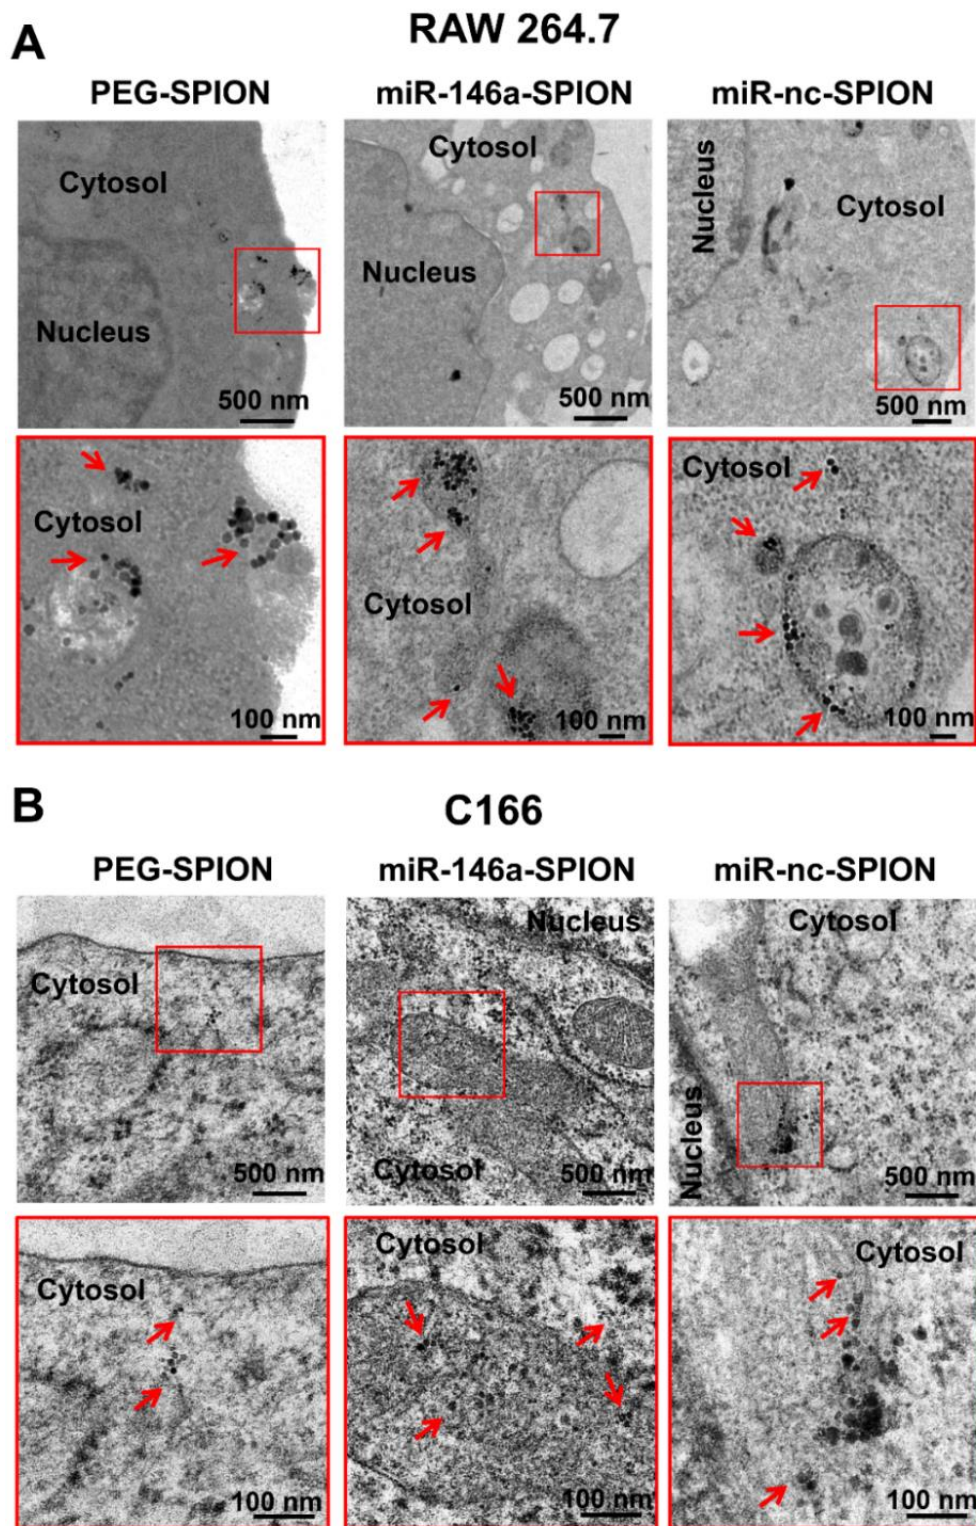

**Fig. S14. Cellular association of PEG-SPIONs and miR-SPIONs by TEM.** Representative TEM images verify that all types of SPIONs, including PEG-SPIONs, miR-146a-SPIONs and miR-nc-SPIONs, enter (A) RAW 264.7 cells and (B) C166 cells after incubation with the cells for 2 h. The bottom panel shows the enlargement of the boxed area in the top panel. Red arrows indicate SPIONs.

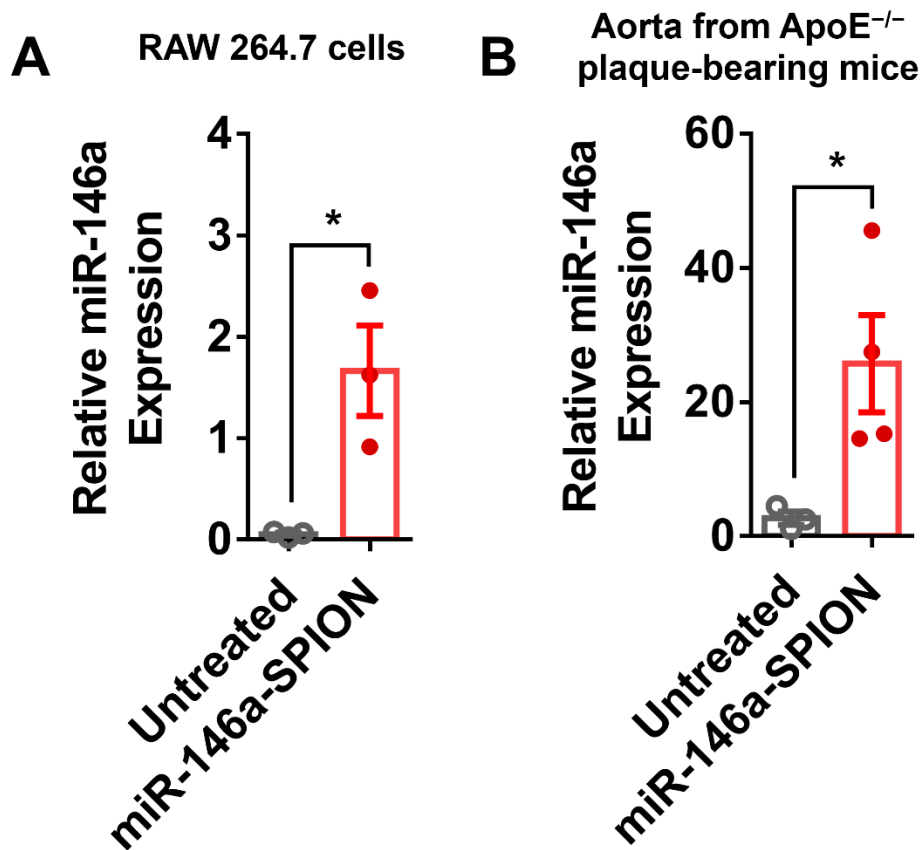

**Fig. S15. Expression of miR-146a following the delivery of miR-146a-SPIONs.** qRT-PCR measurements of miR-146a expression in (A) lipopolysaccharide (LPS)-treated RAW 264.7 macrophages after incubation with miR-146a-SPIONs for 24 h *in vitro* and (B) plaque-bearing ApoE<sup>-/-</sup> mice that underwent a complete treatment of 6 injections of miR-146a-SPIONs over three weeks *in vivo*. When compared to the untreated samples (black), the expression of miR-146a in the treated samples (red) was significantly upregulated *in vitro* and *in vivo*. qRT-PCR was performed using small nuclear RNA gene U6 as the internal control. Data are presented as mean ± SEM. Statistical significance is calculated by Student's t-test, \*P < 0.05. n = 3 cell samples per group, across 1 experiment. n = 3–4 mice per group, across 2 experiments.

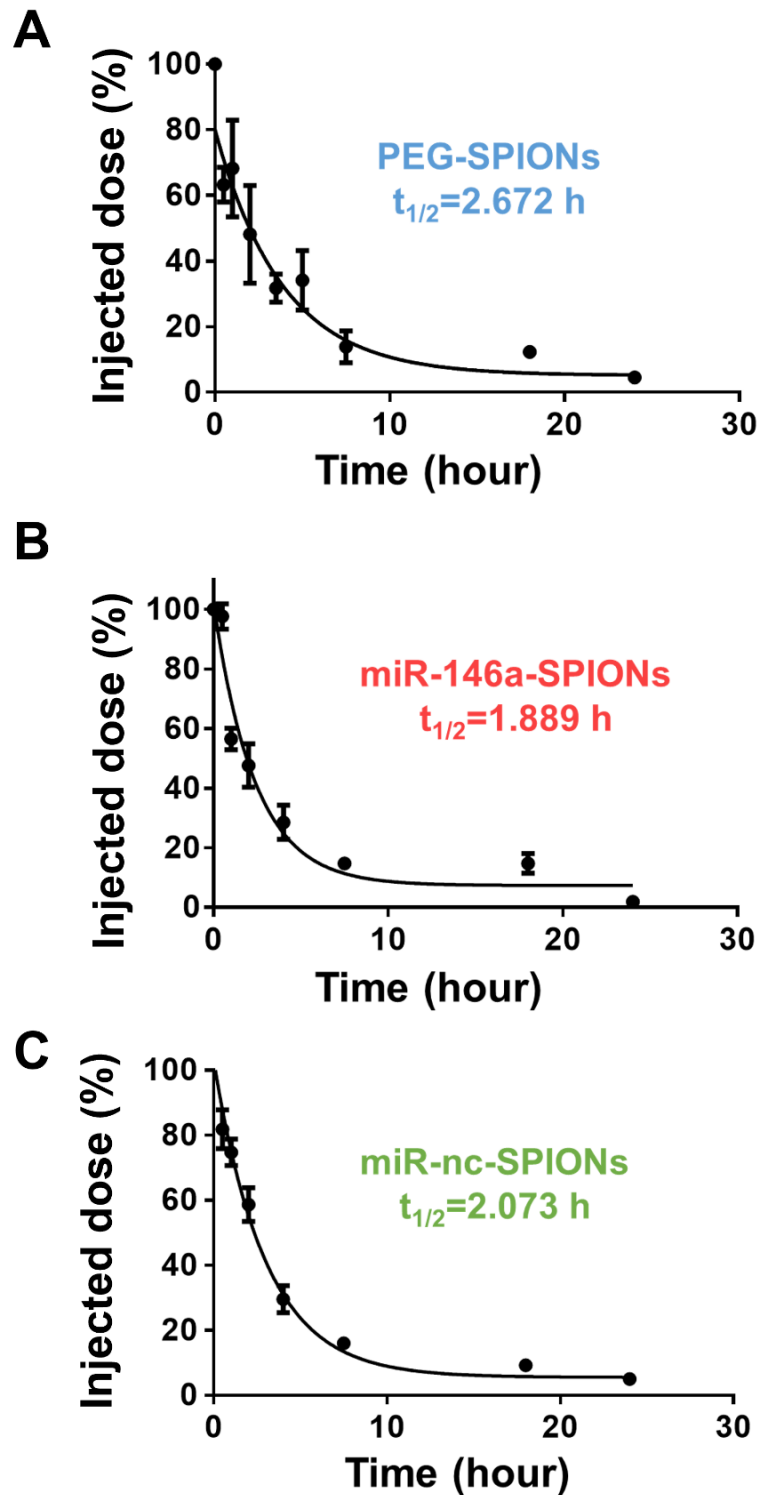

**Fig. S16. Blood pharmacokinetics of PEG-SPIONs and miR-SPIONs in ApoE<sup>-/-</sup> mice.** ICP-MS measurements of the iron content in blood reveal that (A) PEG-SPIONs show slightly slower blood clearance than (B) miR-146a-SPIONs and (C) miR-nc-SPIONs. Both types of miR-SPIONs show similar blood pharmacokinetics.

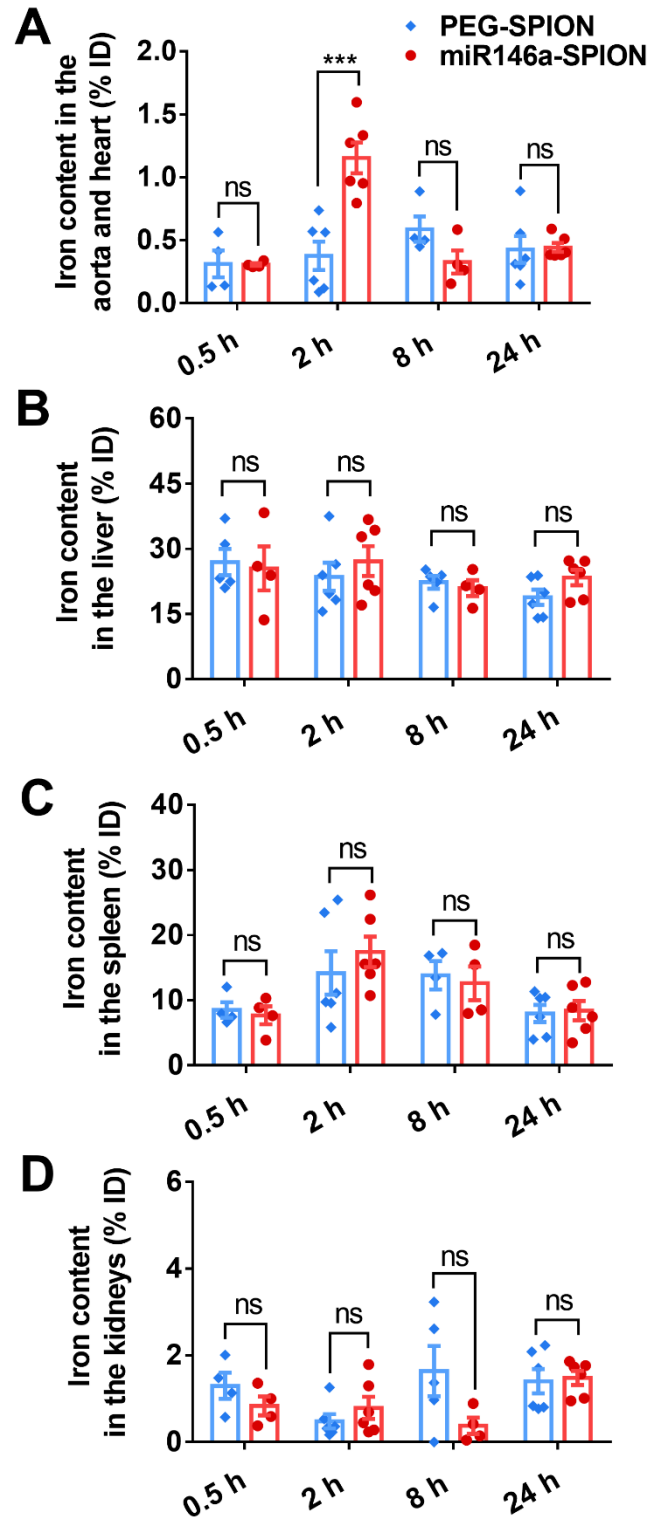

**Fig. S17. Organ-level distribution of PEG-SPIONs and miR-146a-SPIONs in plaque-bearing ApoE<sup>-/-</sup> mice 0.5 h, 2 h, 8 h and 24 h post-injection.** ICP-MS measurements of the iron content show miR-146a-SPIONs accumulate most abundantly in the (A) aorta and heart in plaque-bearing ApoE<sup>-/-</sup> mice 2 h post-injection. The iron contents of PEG-SPIONs (blue) and miR-146a-SPIONs (red) in the (B) liver, (C) spleen, and (D) kidneys are not significantly different in these organs at all time points. Data are presented as mean ± SEM. Statistical significance was calculated by Student's t-test, ns: not significant (P > 0.05), \*\*\*P < 0.001. n = 4–6 mice per group, across 2 experiments.

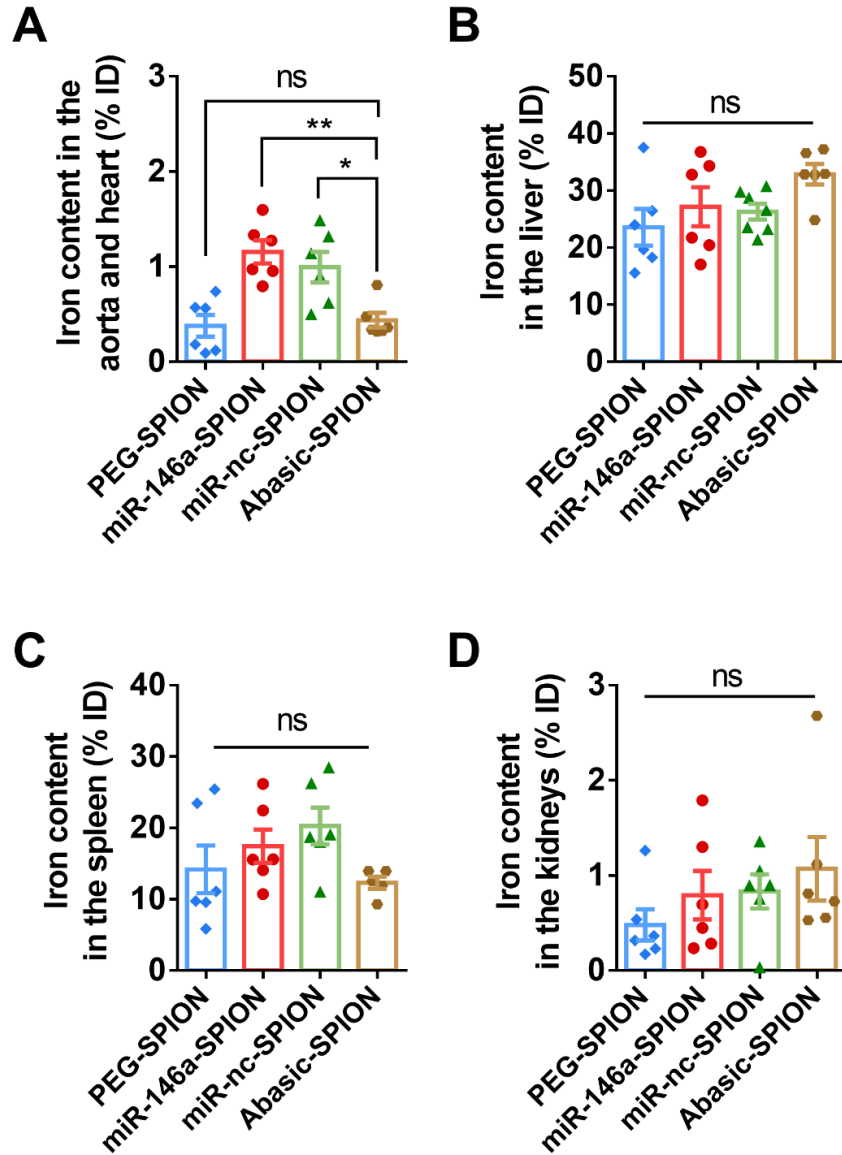

**Fig. S18. Organ-level distribution of different types of SPIONs in ApoE<sup>-/-</sup> mice 2 h post-injection.** ICP-MS measurements of the iron content in the (A) aorta and heart revealed a similar accumulation of abasic-SPIONs to that of PEG-SPIONs but significantly lower than those of miR-146a-SPIONs or miR-nc-SPIONs. ICP-MS measurements of the iron content in the (B) liver, (C) spleen, and (D) kidneys revealed no significant difference in the accumulation of PEG-SPIONs (blue), miR-146a-SPIONs (red), miR-nc-SPIONs (green), and abasic-SPIONs (brown) in these organs. Data are presented as means  $\pm$  SEM. Statistical significance was calculated by one-way ANOVA with Tukey's Test for post-hoc analysis. ns: not significant ( $P > 0.05$ ), \* $P < 0.05$ , \*\* $P < 0.01$ .  $n = 6$  mice per group, across 2 experiments.

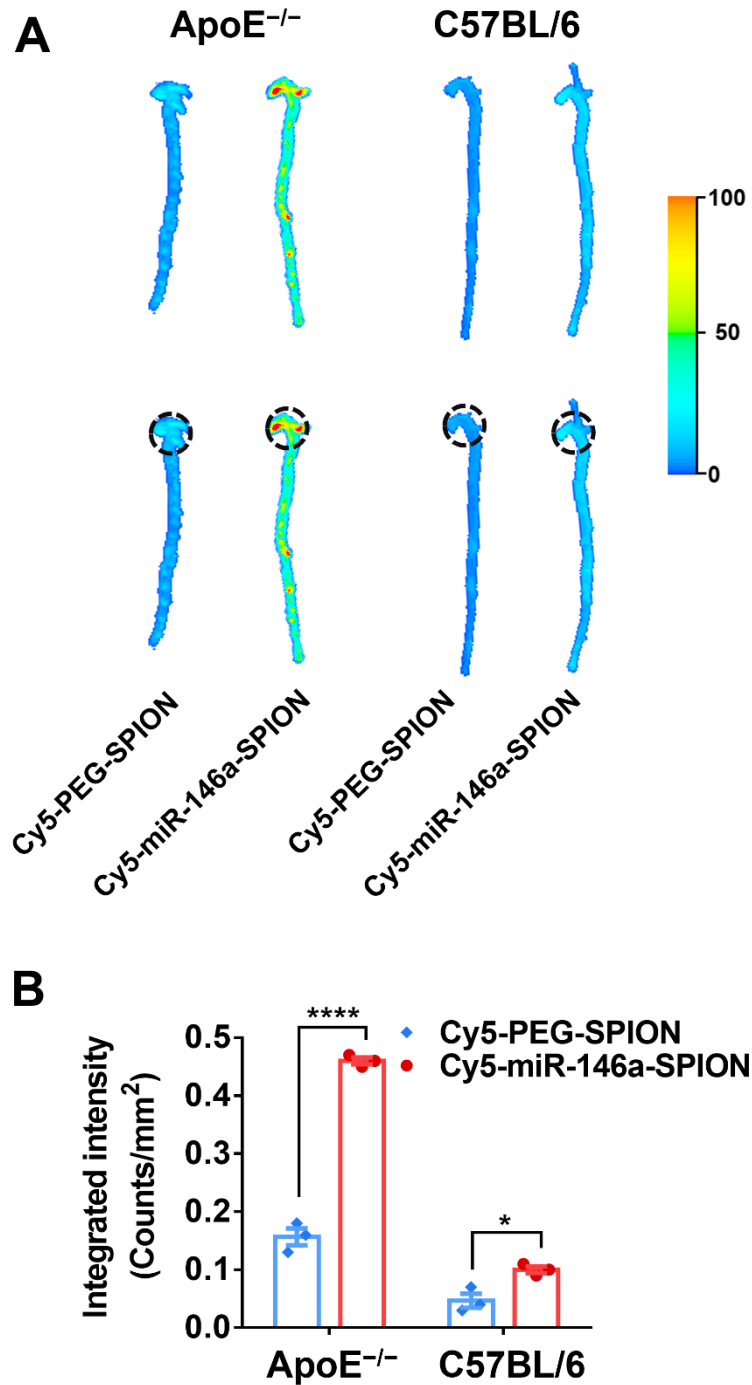

**Fig. S19. Accumulation of Cy5-labeled PEG-SPIONs and miR-146a-SPIONs in the aorta and heart of plaque-bearing ApoE<sup>-/-</sup> mice and healthy C57BL/6 mice 2 h post-injection.** (A) Representative *ex vivo* NIRF imaging of the aorta of plaque-bearing ApoE<sup>-/-</sup> mice or healthy C57BL/6 mice. Black dotted line indicates the region of interest (ROI). (B) The corresponding fluorescence intensities (per unit area) at the plaque sites. Accumulation of Cy5-miR-146a-SPIONs in the plaque is significantly abundant than Cy5-PEG-SPIONs. Data are presented as mean  $\pm$  SEM. Statistical significance was calculated by Student's t-test, ns: not significant ( $P > 0.05$ ), \* $P < 0.05$ , \*\*\*\* $P < 0.0001$ .  $n = 3$  mice per group, across 1 experiment.

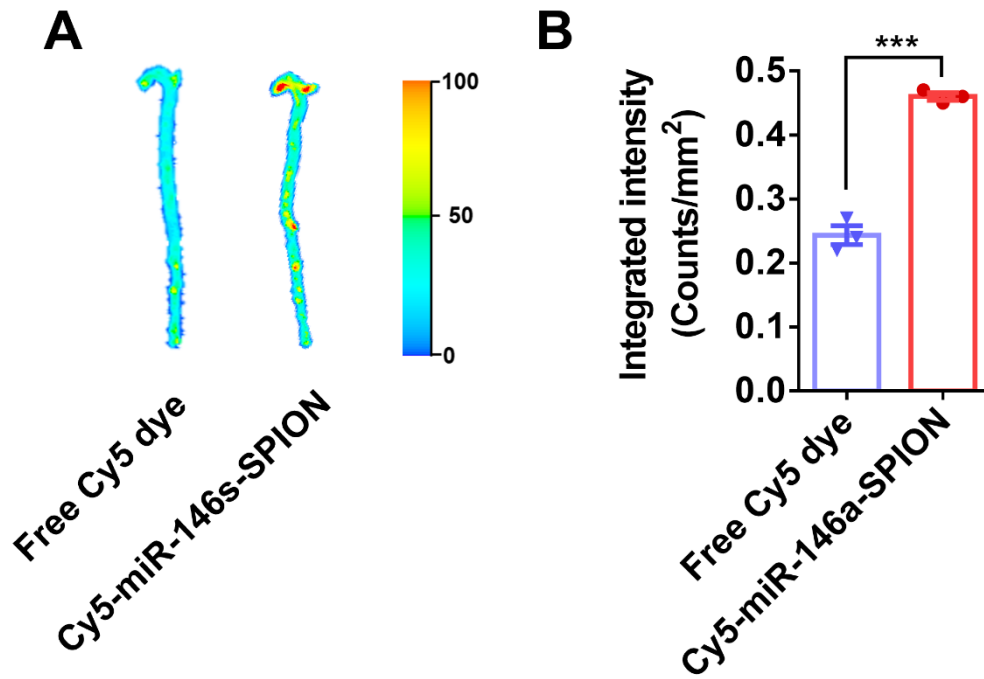

**Fig. S20. Accumulation of Cy5-labeled miR-146a-SPIONs and free Cy5 dyes in the aorta of plaque-bearing ApoE<sup>-/-</sup> mice 2 h post-injection.** (A) Representative *ex vivo* NIRF imaging of the aorta excised from plaque-bearing ApoE<sup>-/-</sup> mice. (B) The corresponding fluorescence intensities (per unit area) at the plaque sites. Accumulation of Cy5-miR-146a-SPIONs in the plaque is pronouncedly higher than free Cy5 dye. This experiment supports the flow cytometry data on free Cy5 dyes in Fig. S24. Data are presented as mean  $\pm$  SEM. Statistical significance is calculated by Student's t-test. \*\*\*P<0.001. n = 3 mice per group, across 1 experiment.



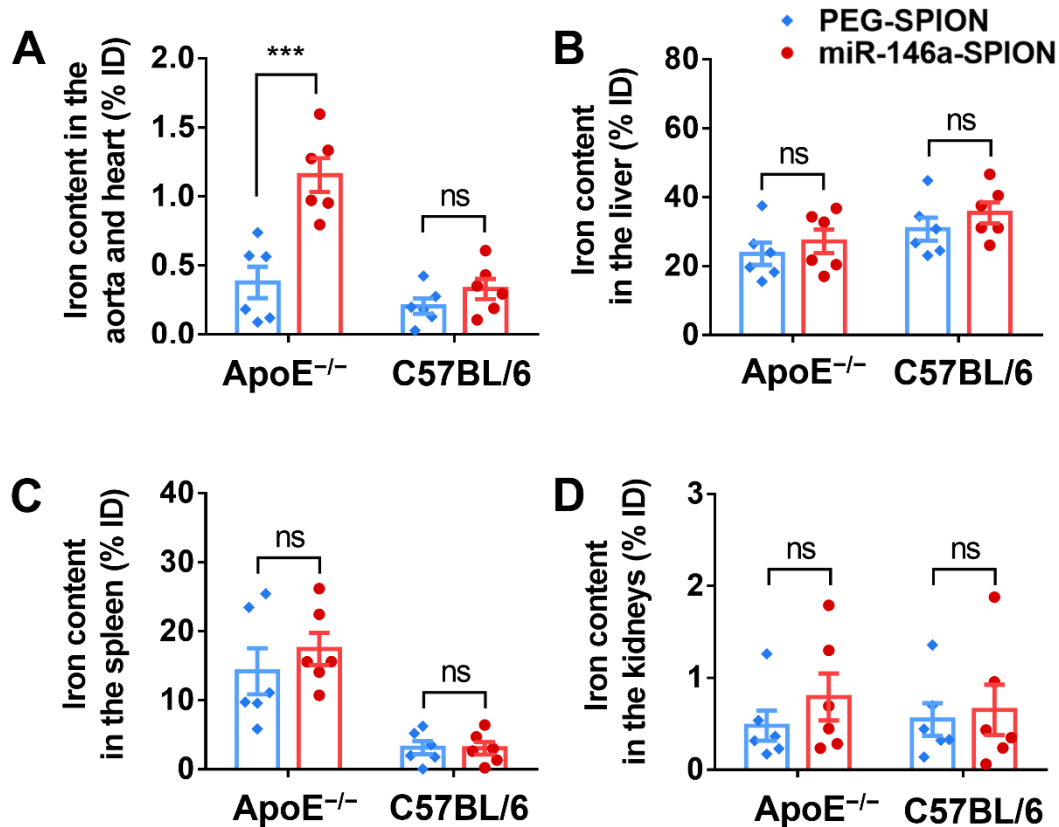

**Fig. S21. Accumulation of PEG-SPIONs and miR-146a-SPIONs in the aorta and heart of plaque-bearing ApoE<sup>-/-</sup> mice and healthy C57BL/6 mice 2 h post-injection.** By ICP-MS measurements, miR-146a-SPIONs more pronouncedly accumulate in (A) the aorta and heart of plaque-bearing ApoE<sup>-/-</sup> mice than PEG-SPIONs, but not in healthy C57BL/6 mice. The iron content in the (B) liver, (C) spleen, and (D) kidneys reveal no significant difference in the accumulation of PEG-SPIONs and miR-146a-SPIONs (red) for both types of mice. These results indicate the preferential delivery of miR-146a-SPIONs to atherosclerotic plaques. Data are presented as mean ± SEM. Statistical significance was calculated by one-way ANOVA with Tukey's Test for post-hoc analysis. ns: not significant ( $P > 0.05$ ), \*\*\* $P < 0.001$ .  $n = 6$  mice per group, across 2 experiments.

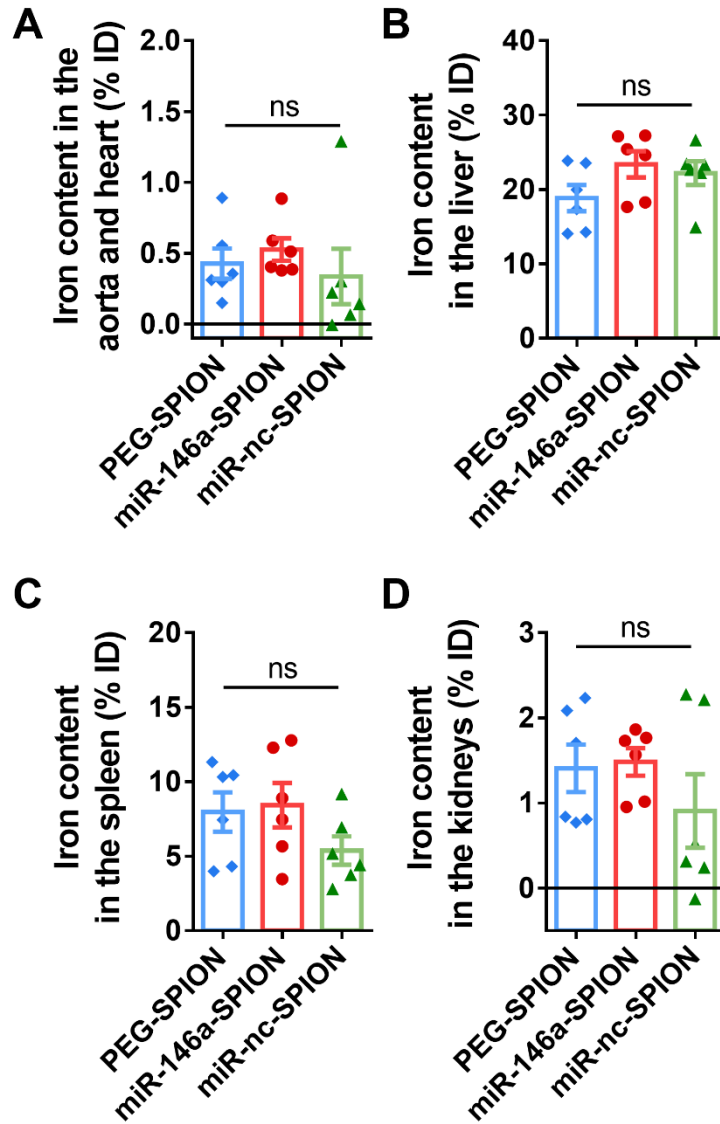

**Fig. S22. Organ-level distribution of PEG-SPIONs and miR-SPIONs in plaque-bearing ApoE<sup>-/-</sup> mice 24 h post-injection.** ICP-MS measurements of the iron content in the (A) aorta and heart, (B) liver, (C) spleen, and (D) kidneys reveal no significant difference in the accumulation of PEG-SPIONs (blue), miR-146a-SPIONs (red), and miR-nc-SPIONs (green) in these organs. Data are presented as means  $\pm$  SEM. Statistical significance was calculated by one-way ANOVA with Tukey's Test for post-hoc analysis. ns: not significant ( $P > 0.05$ ).  $n = 6$  mice per group; across 2 experiments.

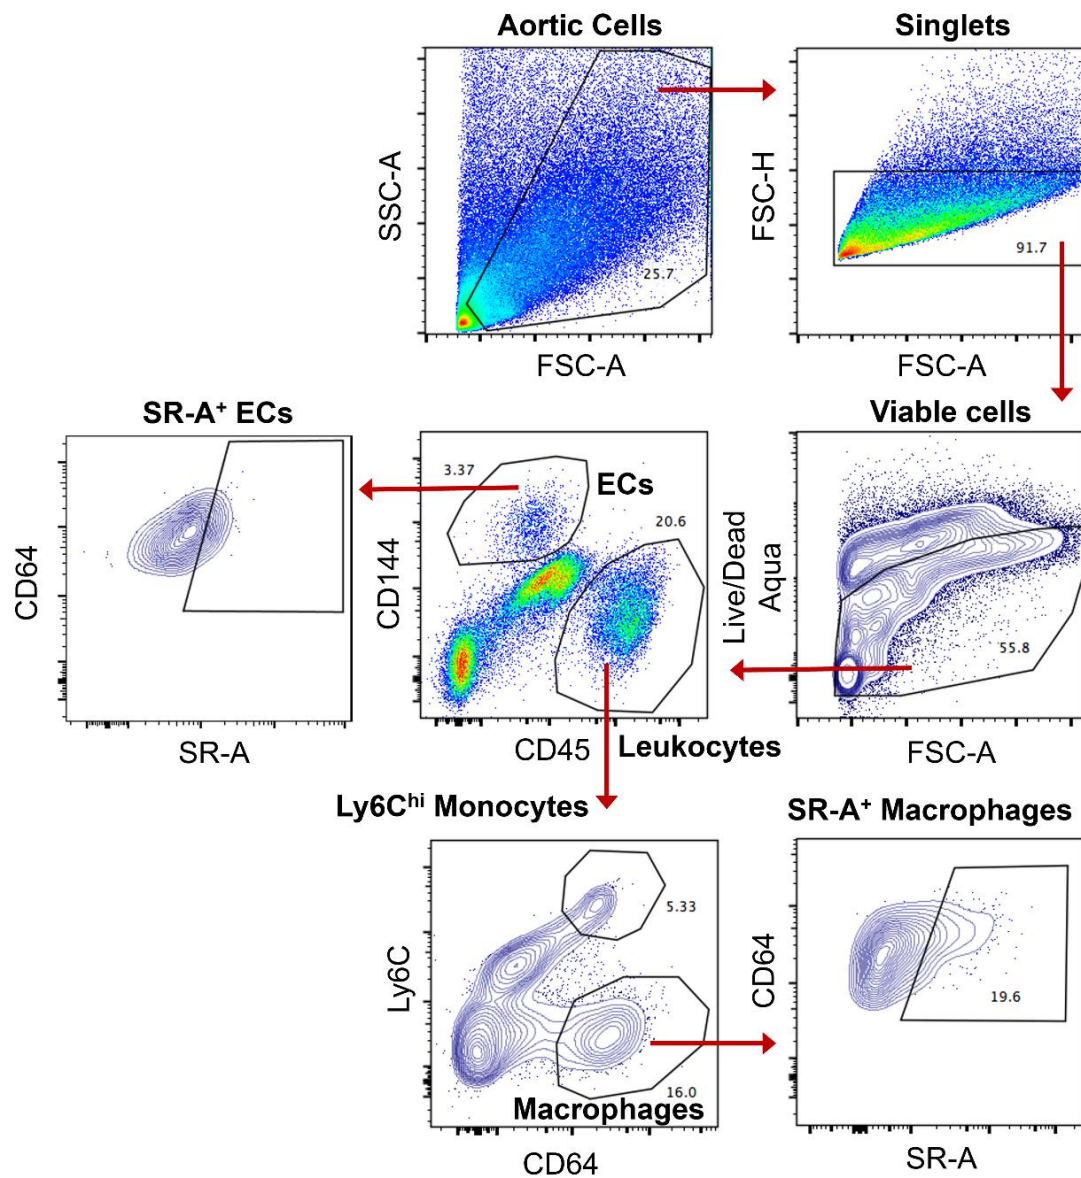

**Fig. S23. Flow cytometry gating strategy for calculating the cellular-level distribution of PEG-SPIONs and miR-SPIONs to the aortic cells 2 h post-injection.** A single cell suspension from the intact aorta was gated on FSC-A and SSC-A to exclude cell debris, followed by exclusion of doublets on FSC-H. Singlets were then gated on Live/Dead Aqua for viable cells. Cells were separated in different staining panels. Aortic macrophages: CD45<sup>+</sup>CD64<sup>+</sup>Ly6C<sup>lo</sup>; ECs: CD45<sup>-</sup>CD144<sup>+</sup>; monocyte-macrophages: CD45<sup>+</sup>Ly6C<sup>hi</sup>CD64<sup>mid</sup>. Macrophages and ECs were further gated on SR-A for SR-A<sup>+</sup> macrophages and SR-A<sup>+</sup> ECs.

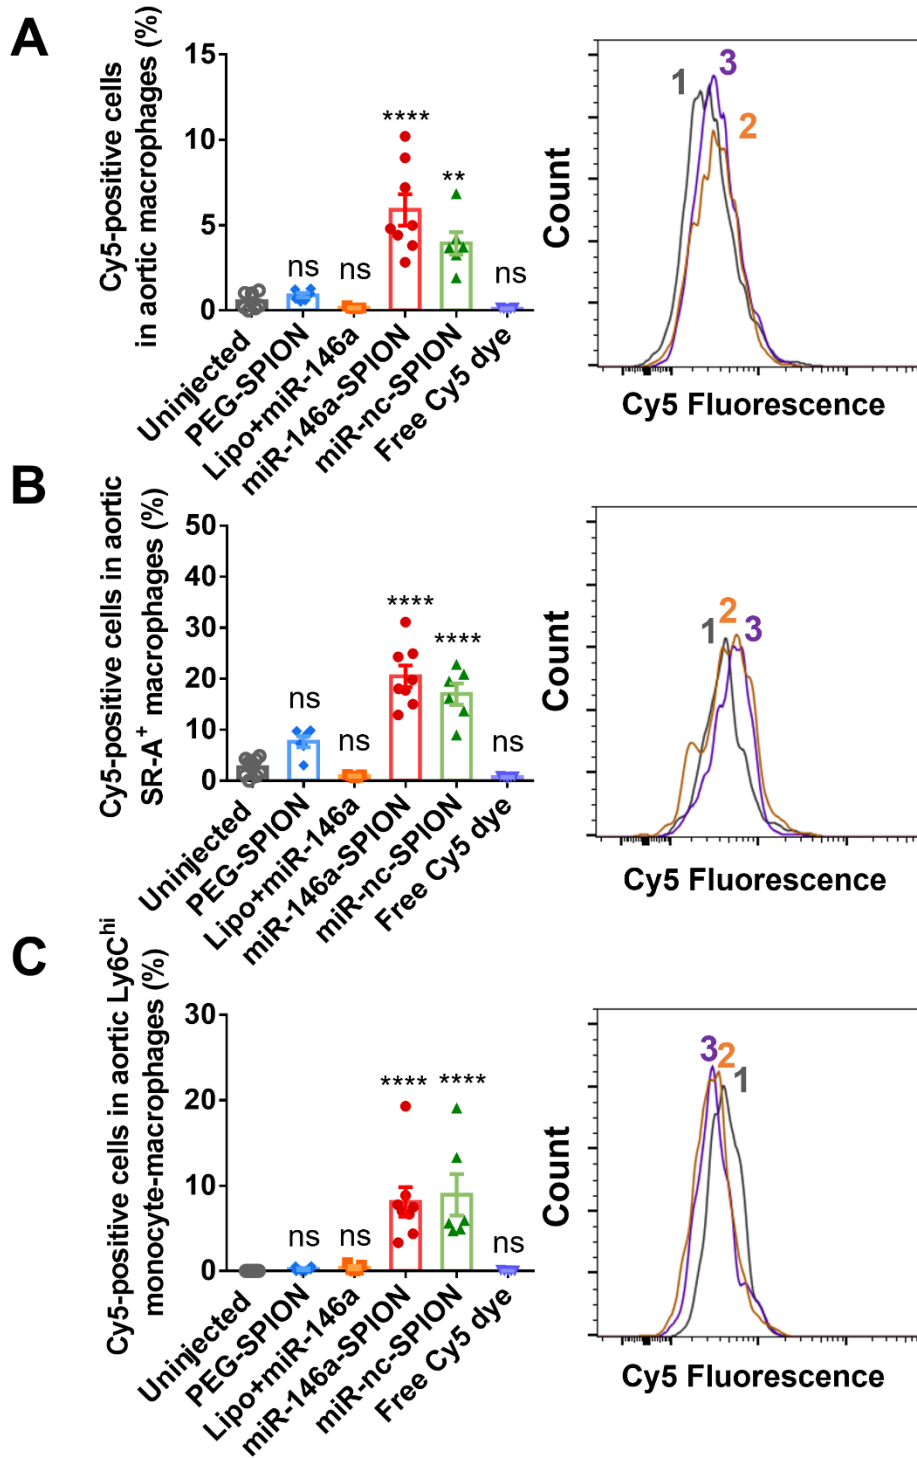

1. Uninjected 2. Lipo+Cy5-miR-146a 3. Free Cy5 dye

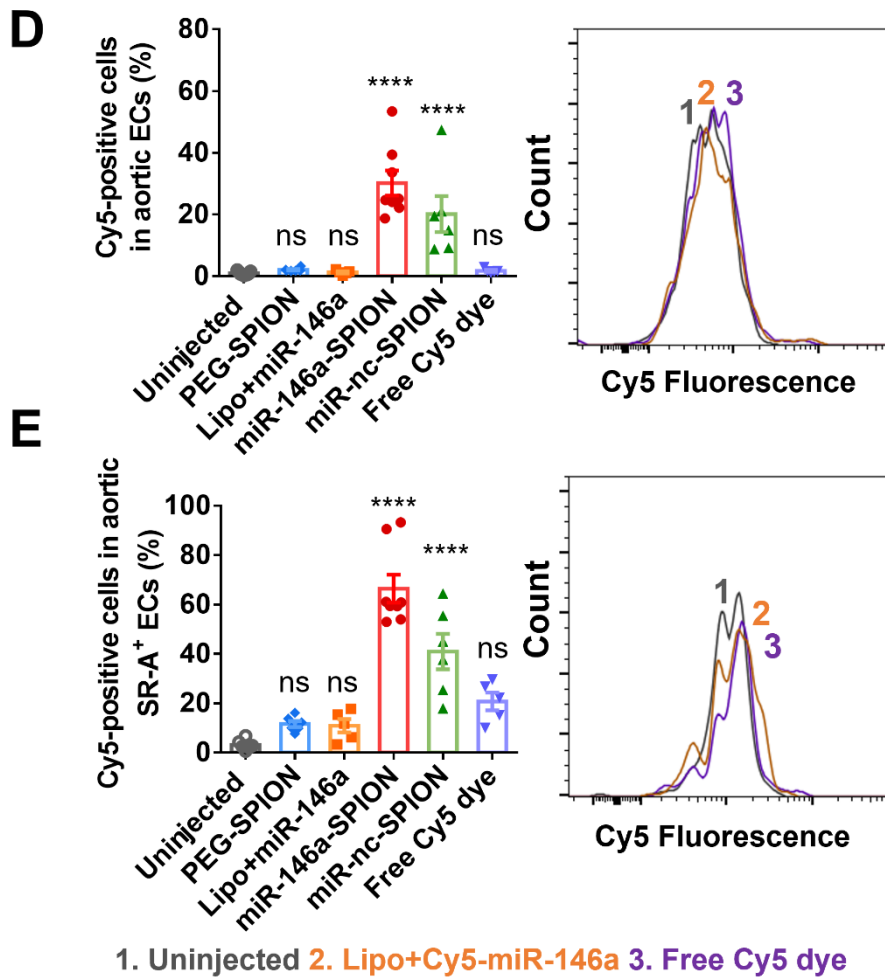

**Fig. S24. Cellular-level distribution of Lipo+Cy5-miR-146a nanocomplex and free Cy5 dye in the aorta of ApoE<sup>-/-</sup> mice 2 h post-injection.** Flow cytometric analysis and representative flow cytometry histograms of the single cells collected from the aorta indicate that Lipofectamine does not effectively deliver Cy5-miR to the (A) total macrophages, (B) SR-A<sup>+</sup> macrophages, (C) monocyte-derived macrophages and (D) total ECs (E) SR-A<sup>+</sup> ECs. The data also indicate that free Cy5 molecules show distinct histograms than Cy5-miR-146a-SPIONs. This experiment supports the data shown in Fig. 2C and 2D. Data are presented as means  $\pm$  SEM. Statistical significance was calculated by one-way ANOVA with Tukey's Test for post-hoc analysis. ns: not significant ( $P > 0.05$ ), \* $P < 0.05$ , \*\*\* $P < 0.001$ , \*\*\*\* $P < 0.0001$ .  $n = 5-8$  mice per group; across 2 experiments.

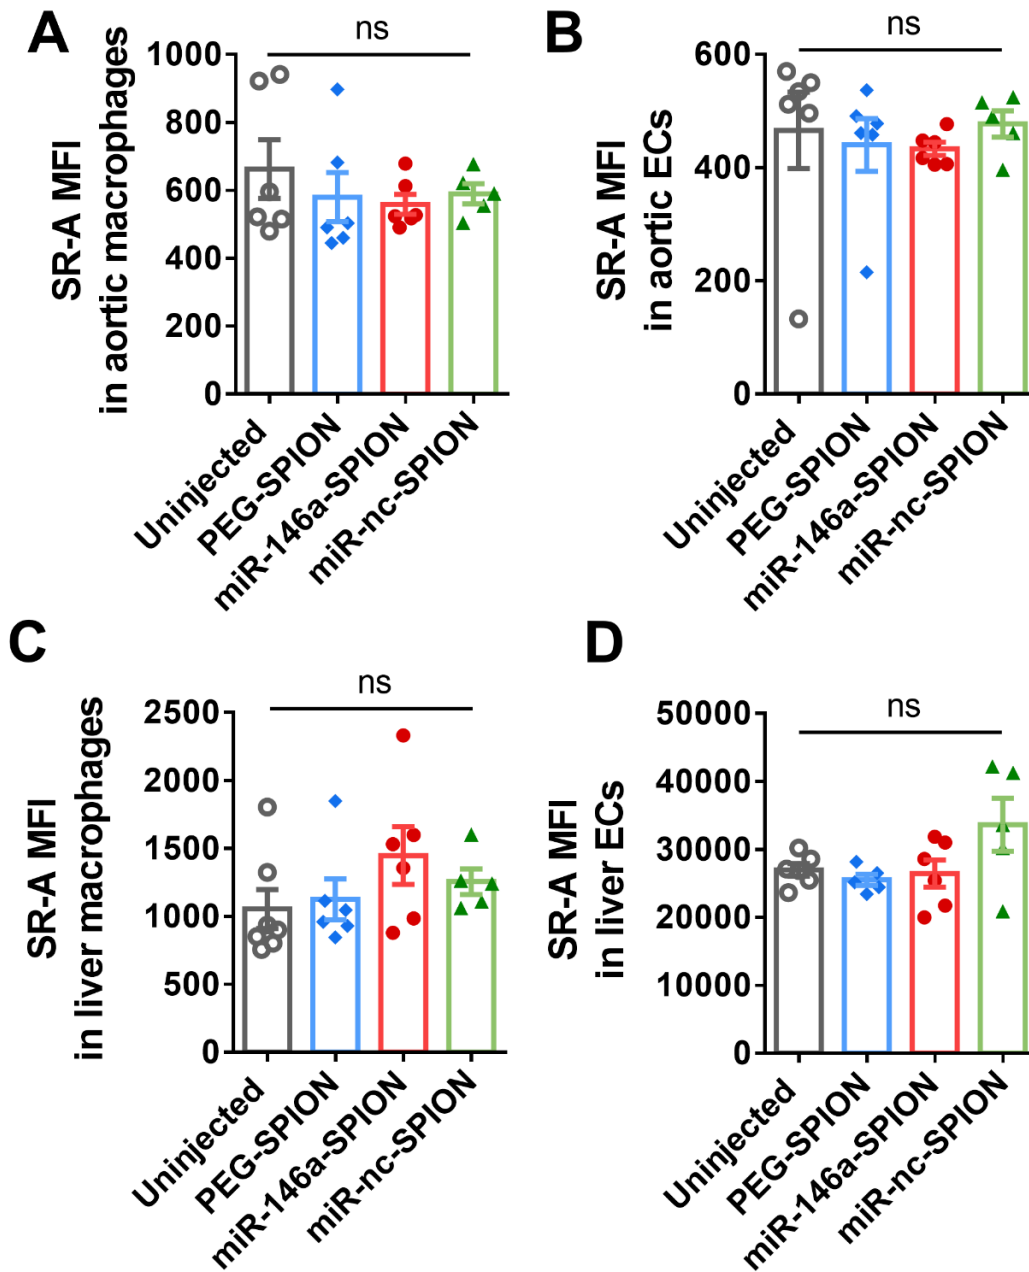

**Fig. S25.** SR-A expression in the aortic cells of  $ApoE^{-/-}$  mice. SR-A MFI of aortic (A) macrophages, (B) ECs, liver (C) macrophages and (D) ECs were detected by flow cytometry after 2 h i.v. injection. This experiment supports the data shown in Fig. 2C and 2D. Data are presented as means  $\pm$  SEM ( $n = 5-7$ ; across 2 experiments). Statistical significance was calculated by one-way ANOVA with Tukey's Test for post-hoc analysis. ns: not significant ( $P > 0.05$ ).

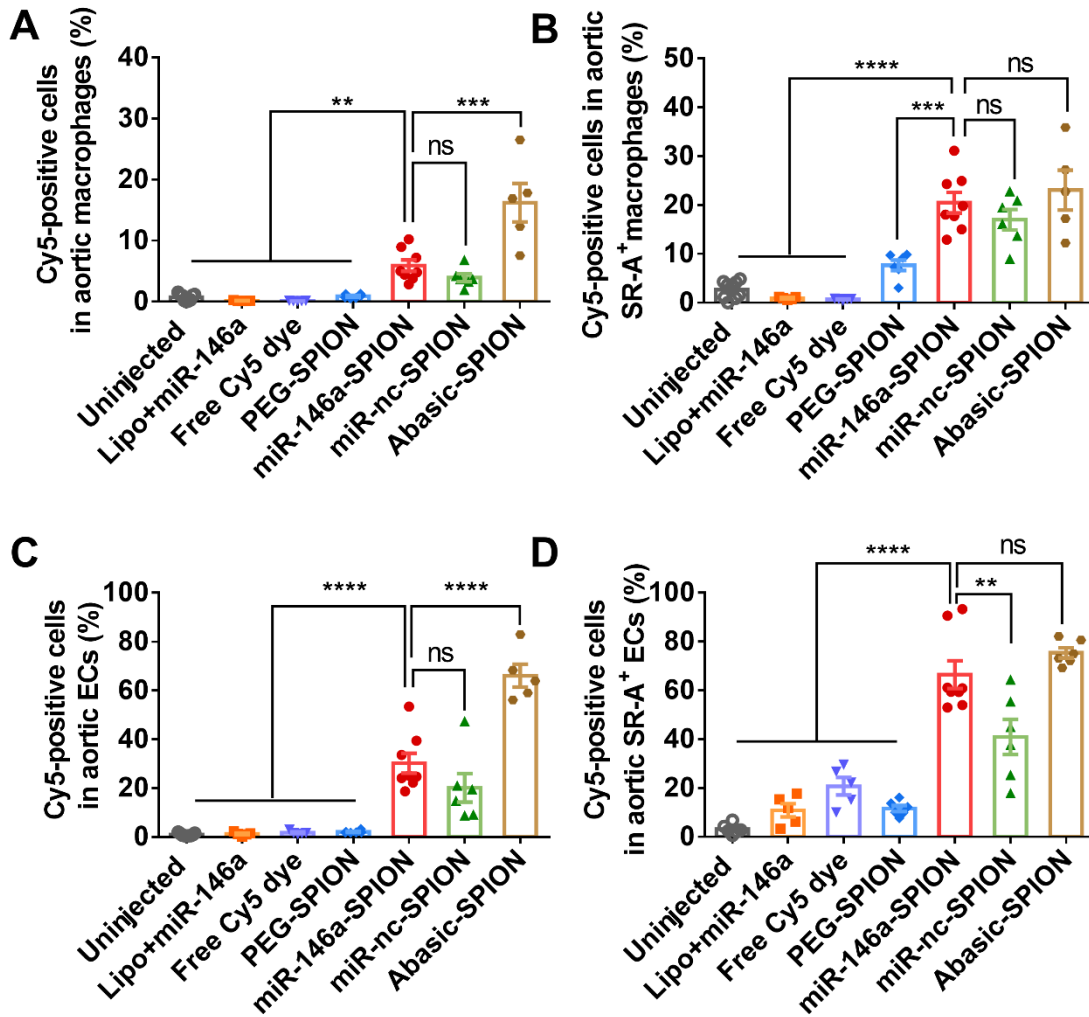

**Fig. S26. Cellular-level distribution of different types of SPIONs, Lipo+Cy5-miR-146a nanocomplex, and free Cy5 dyes in the aorta of ApoE<sup>-/-</sup> mice 2 h post-injection.** Flow cytometry analysis showed that abasic-SPIONs did not preferentially associate to (B) SR-A-rich macrophages and (D) SR-A rich endothelial cells (ECs) in the aorta, different from miR-146a-SPIONs. For abasic-SPIONs, the Cy5-positive cells in total macrophages is (16.2%) similar to that in SR-A-positive macrophages (23.0%). By contrast, for miR-146a-SPIONs, the Cy5-positive cells in SR-A positive macrophages (20.5%) is significantly higher than total macrophages (5.9%). This experiment supports the data shown in Fig. 2C, Fig. 2D and Fig. S20. Data are presented as means  $\pm$  SEM. Statistical significance was calculated by one-way ANOVA with Tukey's Test for post-hoc analysis. ns: not significant ( $P > 0.05$ ), \* $P < 0.05$ , \*\* $P < 0.01$ , \*\*\* $P < 0.001$ , \*\*\*\* $P < 0.0001$ .  $n = 5-8$  mice per group, across 3 experiments.

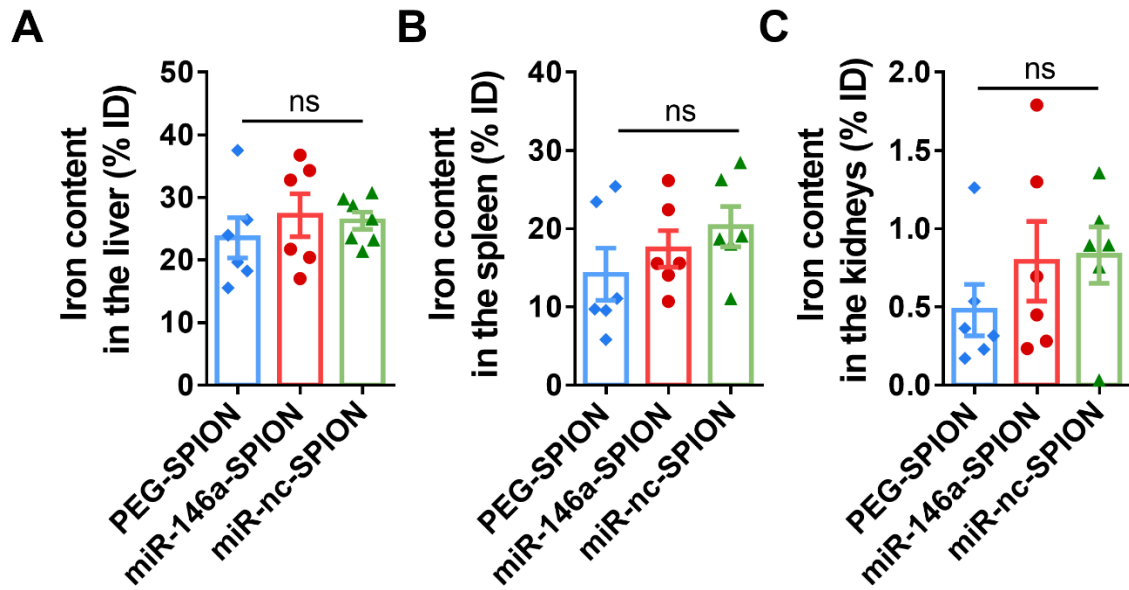

**Fig. S27. Organ-level distribution of PEG-SPIONs and miR-SPIONs in ApoE<sup>-/-</sup> mice 2 h post-injection.** ICP-MS measurements of the iron content in the (A) liver, (B) spleen, and (C) kidneys reveal no significant difference in the accumulation of PEG-SPIONs (blue), miR-146a-SPIONs (red), and miR-nc-SPIONs (green) in these organs. Data are presented as means  $\pm$  SEM. Statistical significance was calculated by one-way ANOVA with Tukey's Test for post-hoc analysis. ns: not significant ( $P > 0.05$ ).  $n = 6$  per group, across 2 experiments.



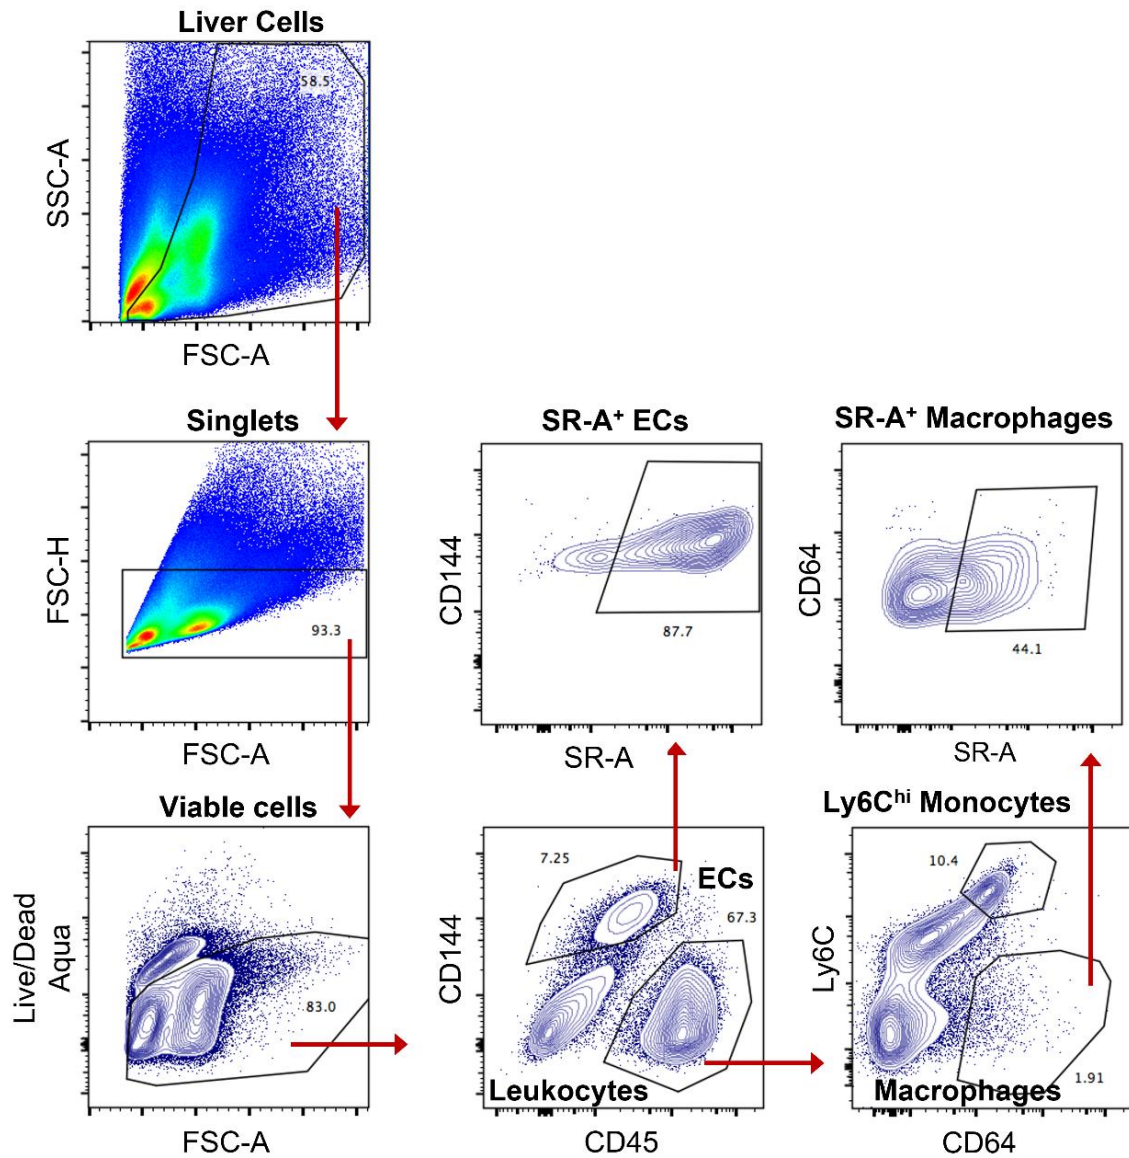

**Fig. S28. Flow cytometry gating strategy for calculating the cellular-level distribution of PEG-SPIONs and miR-SPIONs to the liver cells 2h post-injection.** A single cell suspension from the liver was gated on FSC-A and SSC-A to exclude cell debris, followed by exclusion of doublets on FSC-H. Singlets were gated on Live/Dead Aqua for viable cells to the liver cell population. From this point, cells were separated in different staining panels. Liver total macrophages: CD45<sup>+</sup>CD64<sup>+</sup>Ly6C<sup>lo</sup>; total ECs: CD45<sup>-</sup>CD144<sup>+</sup>; monocyte-macrophage: CD45<sup>+</sup>Ly6C<sup>hi</sup>CD64<sup>mid</sup>. Macrophages were further gated on SR-A for SR-A<sup>+</sup> macrophages.

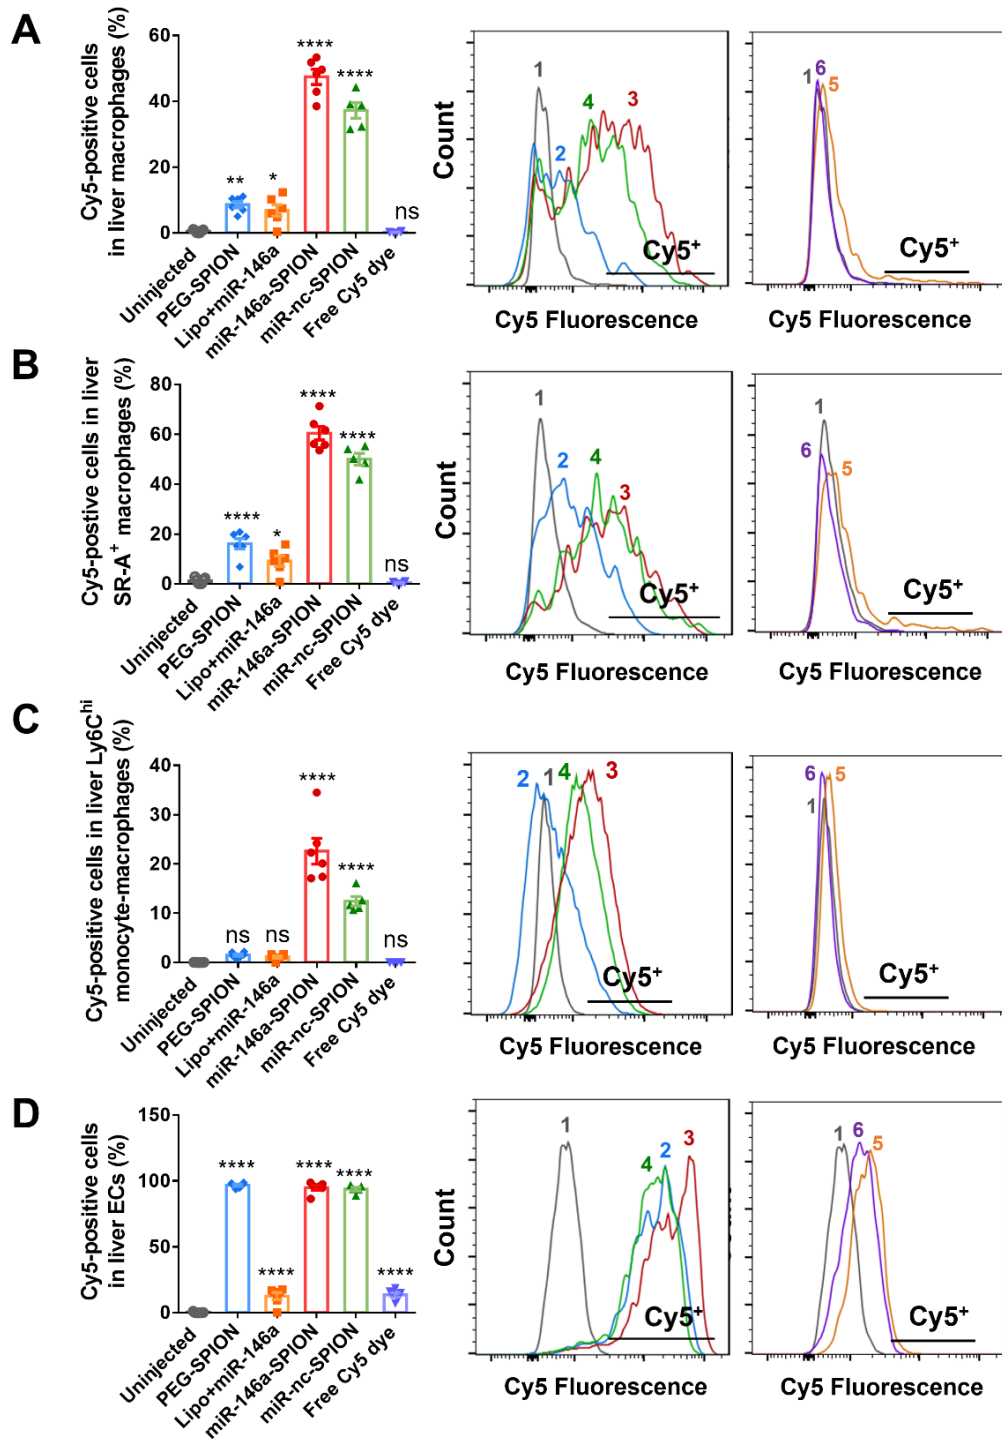

**Fig. S29. Cellular-level distribution of Lipo+Cy5-miR-146a nanocomplex and free Cy5 dye in the liver of ApoE<sup>-/-</sup> mice 2 h post-injection.** Flow cytometric analysis and representative flow cytometry histograms of the single cells collected from the liver indicate that Lipofectamine does not deliver Cy5-miR to the (A) total macrophages, (B) SR-A-rich macrophages, (C) monocyte-macrophages and (D) ECs as effectively as miR-SPIONs. Data on percentage of Cy5-positive cells show that liver total macrophages, monocyte-derived macrophages, and CD204<sup>+</sup> macrophages most likely associate with Cy5-miR-SPIONs of all SPIONs tested, but liver ECs associate with all types of SPIONs to similar extents. The data also indicate that free Cy5 molecules show distinct histograms than Cy5-miR-146a-SPIONs.

Data are presented as means  $\pm$  SEM. Statistical significance was calculated by one-way ANOVA with Tukey's Test for post-hoc analysis. ns: not significant ( $P > 0.05$ ), \* $P < 0.05$ , \*\* $P < 0.01$ , \*\*\*\* $P < 0.0001$ .  $n = 5-7$  mice per group; across two experiments.

### Cellular-level distribution of SPIONs in the liver

As ~30 % ID of the SPIONs accumulate in the liver 2 h post-injection (Fig. S27A), we studied their cellular-level distribution in the liver by flow cytometry (see gating strategy in Fig. S28). The mean fractions of Cy5-positive liver total macrophages for the Cy5-miR-146a-SPION (47.4%) and Cy5-miR-nc-SPION (37.2%) groups are 4–5 folds higher than that of the Cy5-PEG-SPION group (8.6%) (Fig. S29A). Similarly, the mean fractions of Cy5-positive liver SR-A-rich macrophages for the Cy5-miR-146a-SPION (60.4%) and Cy5-miR-nc-SPION (50.0%) groups are 3–4 fold higher than that of Cy5-PEG-SPION group (16.1%) (Fig. S29B). These data agree with the findings for aortic macrophages that the miRNA shell promotes delivery to liver total macrophages, and more preferentially to liver SR-A-rich macrophages. These data also agree with the much higher SR-A expression or fraction on liver ECs than aortic ECs (Fig. S25 and Fig. S30). Contrary to aortic total ECs, the mean fractions of Cy5-positive liver total ECs are similarly high for all three SPION groups, mostly >90% (Fig. S29D). The miRNA shell does not promote delivery to liver total ECs, in line with literature precedent on the abundant clearance of i.v. injected PEG-coated gold NPs by liver total ECs, possibly due to the reduced blood flow in the liver sinusoidal capillaries that encourage interaction between the NPs and ECs (14). Given the high fractions of Cy5-positive liver total ECs, it was challenging to quantify the association of SPIONs to liver SR-A-rich ECs.

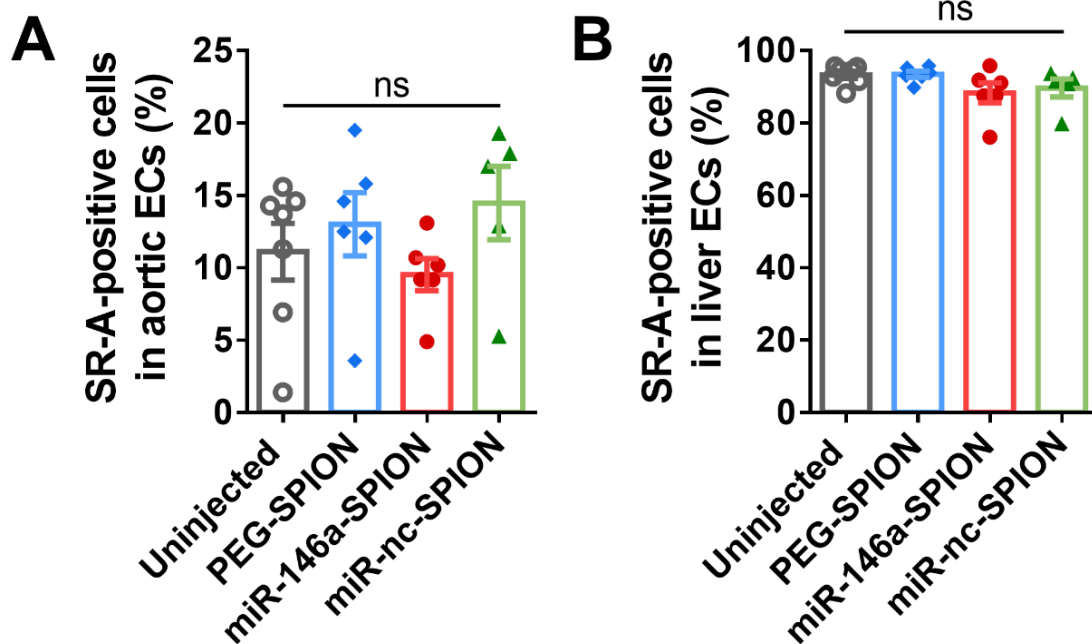

**Fig. S30.** The fraction of SR-A-positive cells in liver ECs of ApoE<sup>-/-</sup> mice. SR-A-positive cells percentage of (A) aortic ECs and (B) liver ECs were detected by flow cytometry after 2 h i.v. injection. This figure supports the data shown in Fig. 2C and Fig. S29D. Data are presented as means  $\pm$  SEM. Statistical significance was calculated by one-way ANOVA with Tukey's Test for post-hoc analysis. ns: not significant ( $P > 0.05$ ).  $n = 5-7$ ; across 2 experiments.

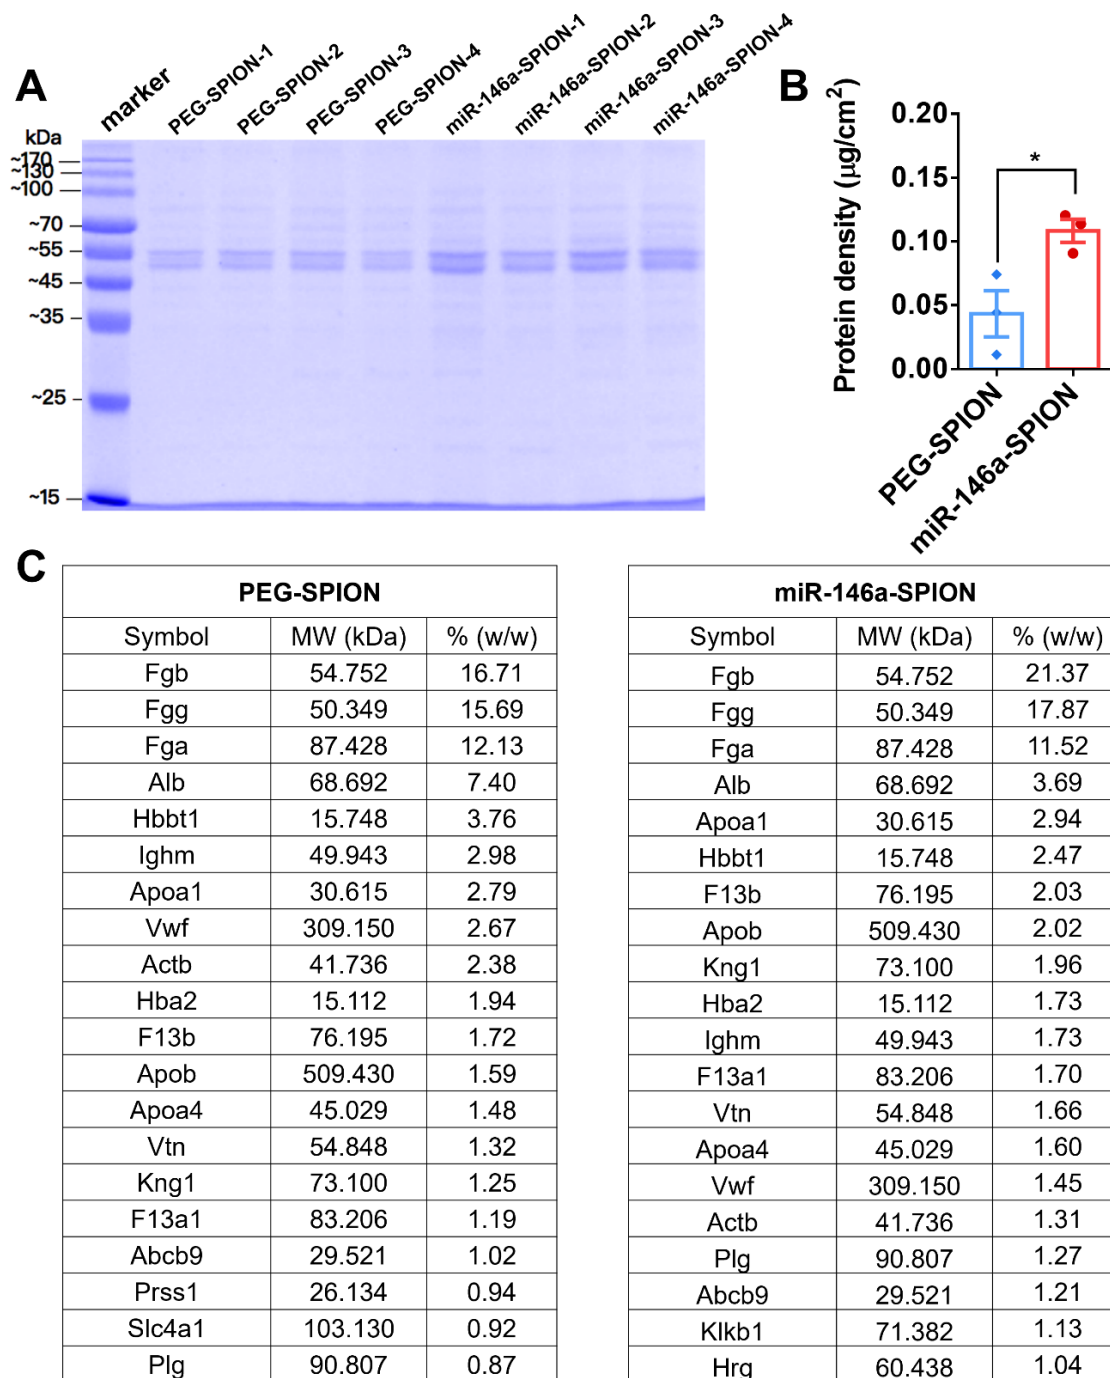

**Fig. S31. Protein corona composition of PEG-SPIONs and miR-146a-SPIONs upon incubation in blood plasma of *ApoE*<sup>-/-</sup> mice that were fed with a high-cholesterol diet for 12 weeks for 2 h.** (A) Polyacrylamide gel electrophoresis (PAGE) analysis of adsorbed proteins after incubation of PEG-SPIONs and miR-146a-SPIONs in blood plasma at 37 °C for 2 h. The darker bands in the miR-146a-SPION sample indicate more serum proteins bound to the SPION. (B) Density of adsorbed proteins on PEG-SPIONs and miR-146a-SPIONs by bicinchoninic acid (BCA) assay. More proteins were bound to miR-146a-SPIONs than PEG-SPIONs. Data are presented as mean ± SEM. Statistical significance was calculated by Student's t-test, \*P < 0.05. n = 3 cell samples per group, across 1 experiment. (C) The most abundant 20 proteins of the protein corona surrounding PEG-SPIONs and miR-146a-SPIONs as detected by label free liquid chromatograph-tandem mass spectrometry (LC-MS/MS) in triplicates. All blood plasma samples were collected from plaque-bearing *ApoE*<sup>-/-</sup> mice that

were fed with high-cholesterol diet for 12 weeks. Relative abundance (%) represents the weight percentage of each constituent protein. Proteins are represented by MGI symbols. (Abcb9) ATP-binding cassette sub-family B member 9; (Actb) Actin, cytoplasmic 1; (Alb) Albumin; (Apoa1) Apolipoprotein A-I; (Apoa4) Apolipoprotein A-IV; (Apob) Apolipoprotein B; (Fga) Fibrinogen alpha chain; (Fgb) Fibrinogen beta chain; (Fgg) Fibrinogen gamma chain; (F13a1) Coagulation factor XIII A chain; (F13b) Coagulation factor XIII B chain; (Hba2) Hemoglobin, alpha 2; (Hbbt1) Beta-globin; (Hrg) Histidine-rich glycoprotein; (Ighm) Immunoglobulin heavy constant mu; (Klk1) Plasma kallikrein; (Kng1) Kininogen-1; (Plg) Plasminogen; (Prss1) Serine protease 1; (Slc4a1) Solute carrier family 4 member 1; (Vwf) von Willebrand factor. Values represent the percentage of each protein by weight.

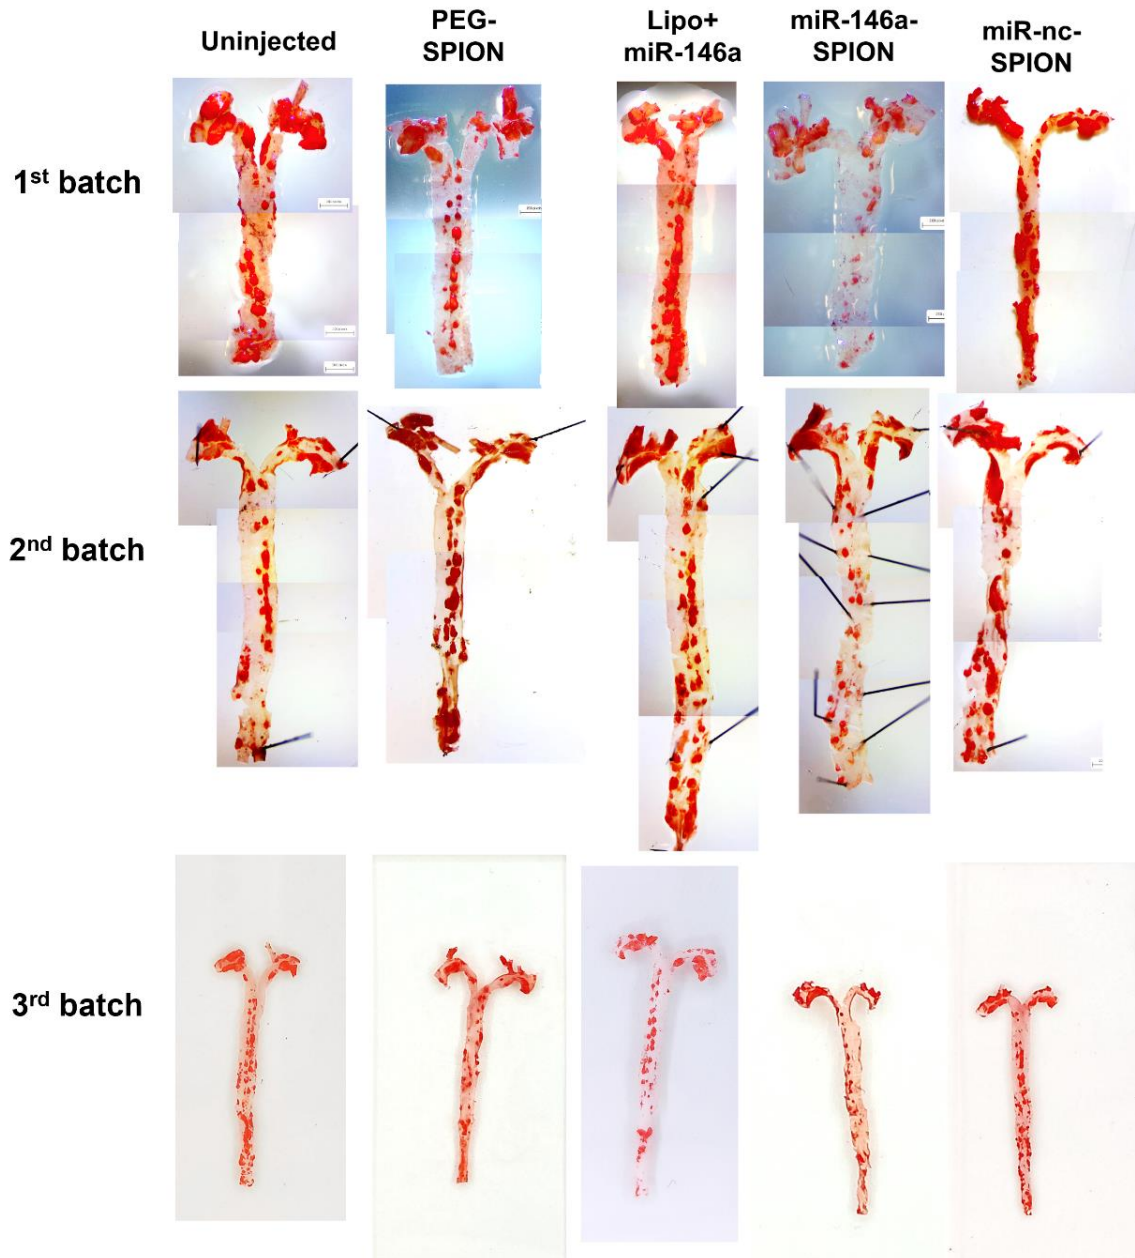

**Fig. S32. Representative images of Oil Red O-stained intact aortas excised from ApoE<sup>-/-</sup> mice.** These mice were either uninjected or received treatments of PEG-SPIONs, Lipo+miR-146a, miR-146a-SPIONs, or miR-nc-SPIONs. The 1<sup>st</sup> and 2<sup>nd</sup> batch of images were photographed using a CCD camera attached to a dissection microscope (Zeiss, Stemi 305) and optically stitched together. The 3<sup>rd</sup> batch of images was photographed by a regular camera.

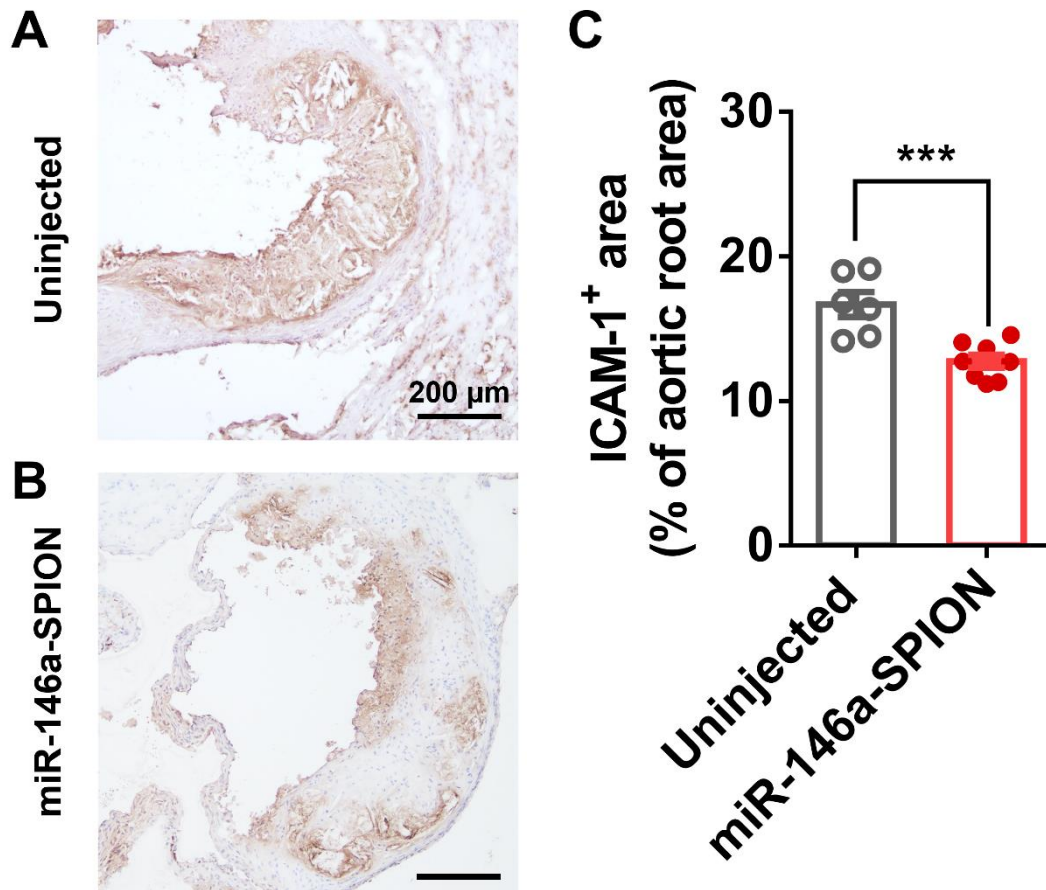

**Fig. S33. Validation of the anti-atherosclerosis efficacy of miR-146a-SPIOs in ApoE<sup>-/-</sup> mice by IHC.** The full treatment includes 6 doses of miR-146a-SPIOs over a period of 3 weeks. Representative IHC images of the sections of aortic roots from (A) uninjected and (B) miR-146a-SPIOs-treated groups reveal attenuated expression of ICAM-1 (brown) for the miR-146a-SPIO group. (C) ICAM-1-positive area in the aortic root for the miR-146a-SPIO group is significantly lower than that for the uninjected group. These data bolster the validity of the immunofluorescence-based efficacy evaluation in Fig. 4B of the main text. Data are presented as mean  $\pm$  SEM. Statistical significance was calculated by Student's t-test, \*\*\*P < 0.001. n = 6–8 mice per group, across 3 experiments.

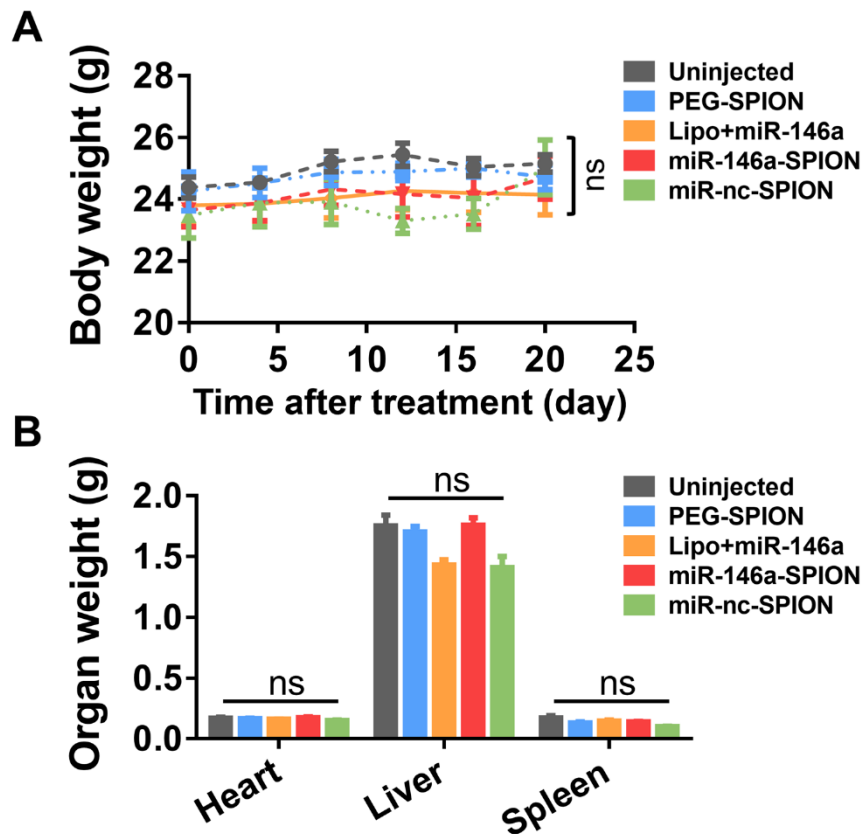

**Fig. S34. *In vivo* toxicity following multiple administrations of various treatment groups to ApoE<sup>-/-</sup> mice.** The administrations are based on the dose and dosing frequency of our treatment. (A) Body weight of mice from various treatment groups throughout the treatment. (B) Weight of major organs all treatment groups. Data are presented as means  $\pm$  SEM. Statistical significance was calculated by one-way ANOVA with Tukey's Test for post-hoc analysis, ns: not significant ( $P > 0.05$ ).  $n = 6-8$  mice per group, across 3 experiments.



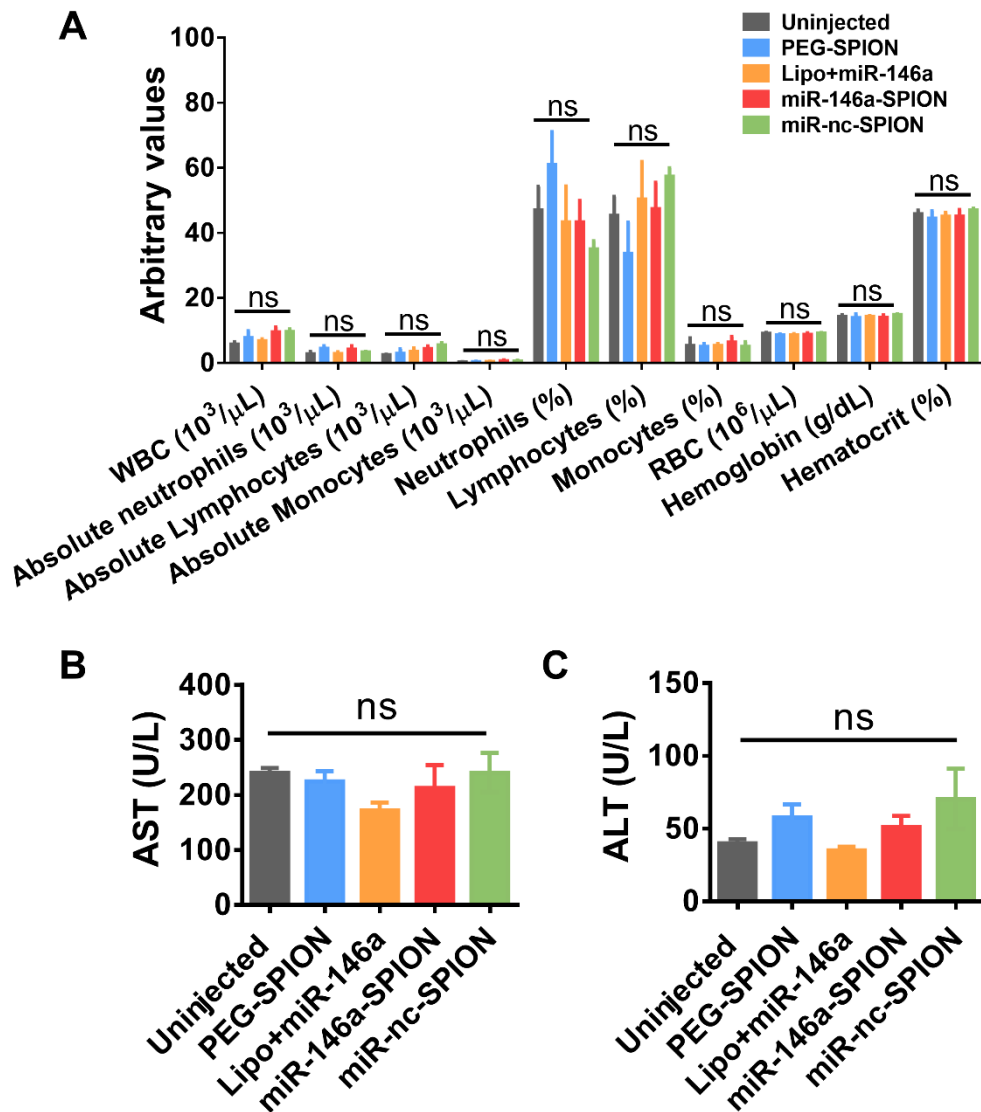

**Fig. S35. *In vivo* toxicity of various treatment groups of ApoE<sup>-/-</sup> mice by complete blood cell count.** Blood was collected 24 h after the last injection of PEG-SPIONs (blue), Lipo+miR-146a nanocomplex, miR-146a-SPIONs (red), or miR-nc-SPIONs (green). **(A)** Compared to uninjected mice (black), all treatment groups show no significant difference in blood chemistry markers or cell counts WBC: white blood cell. RBC: red blood cell. Absolute neutrophils, lymphocytes, or monocytes ( $10^3/\mu\text{L}$ ): cell number per volume of blood. Neutrophils %, lymphocytes %, monocytes %: percentage cells among total WBC. RBC ( $10^6/\mu\text{L}$ ): cell number per volume of blood. Liver toxicity examined by measuring levels of serum **(B)** aspartate transaminase (AST) and **(C)** alanine transaminase (ALT). Data are presented as mean  $\pm$  SEM. Statistical significance was calculated by one-way ANOVA with Tukey's Test for post-hoc analysis, ns: not significant ( $P > 0.05$ ).  $n=3$  mice per group, across 1 experiment.

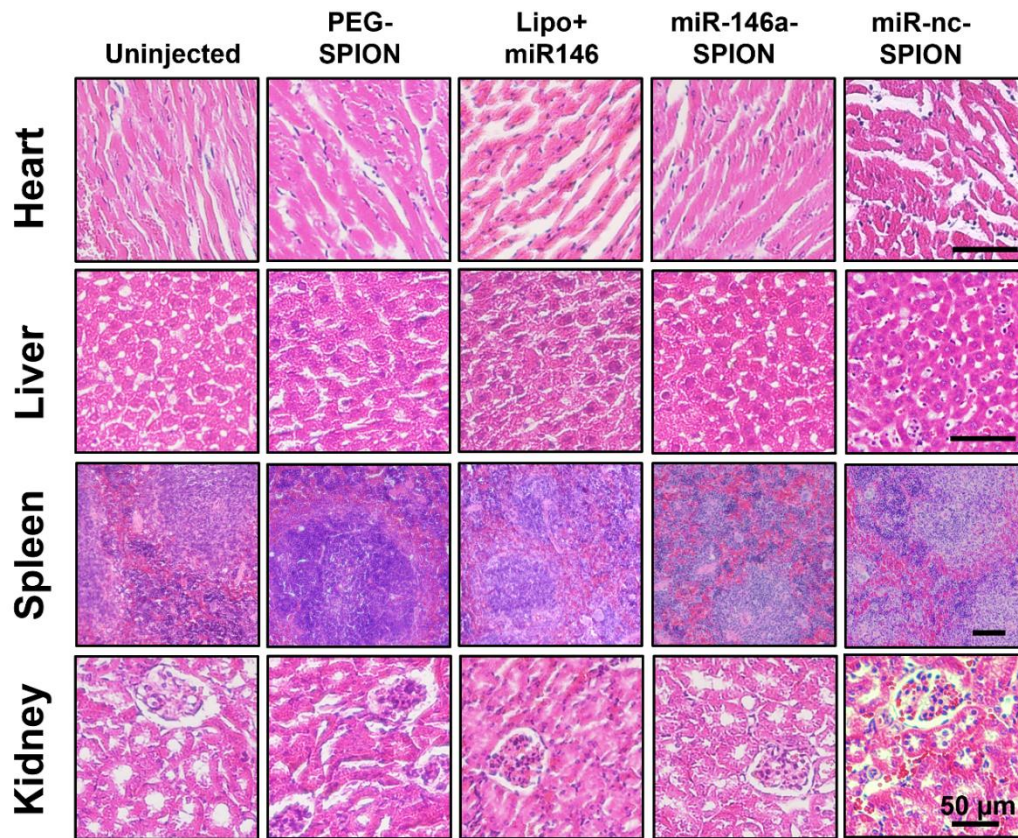

**Fig. S36. Histological examination of major internal organs in various treatment groups.** Histological examination of the heart, liver, spleen, and kidney harvested from ApoE<sup>-/-</sup> mice with advanced atherosclerotic plaques that were subject to different treatments shows no appreciable change in tissue morphology. Representative images were chosen from n = 6–8 mice per group, across 3 experiments.

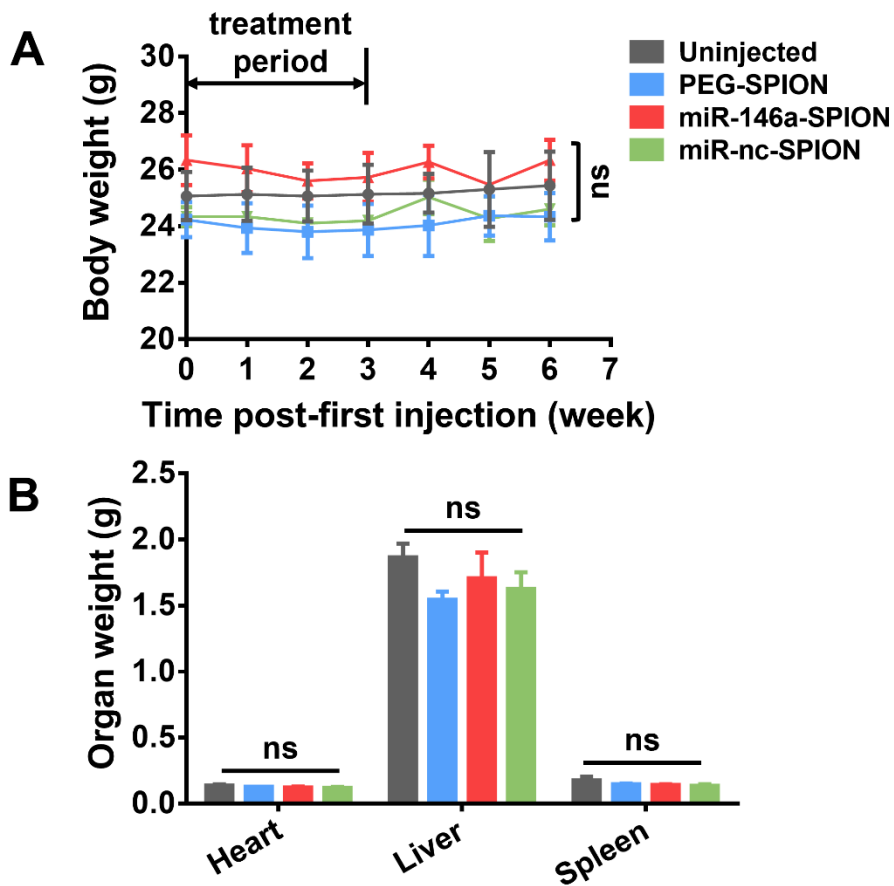

**Fig. S37. *In vivo* long-term toxicity of various types of SPIONs following a complete treatment in ApoE<sup>-/-</sup> mice.** The treatment includes 6 doses over a period of 3 weeks, followed by a 4-week treatment period to observe the effect of treatment on long-term toxicity. **(A)** Body weight of mice from various treatment groups throughout the treatment and 4 weeks post-treatment period. **(B)** Weight of major organs of all treatment groups. Data are presented as means  $\pm$  SEM. Statistical significance was calculated by one-way ANOVA with Tukey's Test for post-hoc analysis, ns: not significant ( $P > 0.05$ ).  $n = 6$  mice per group, across 2 experiments.

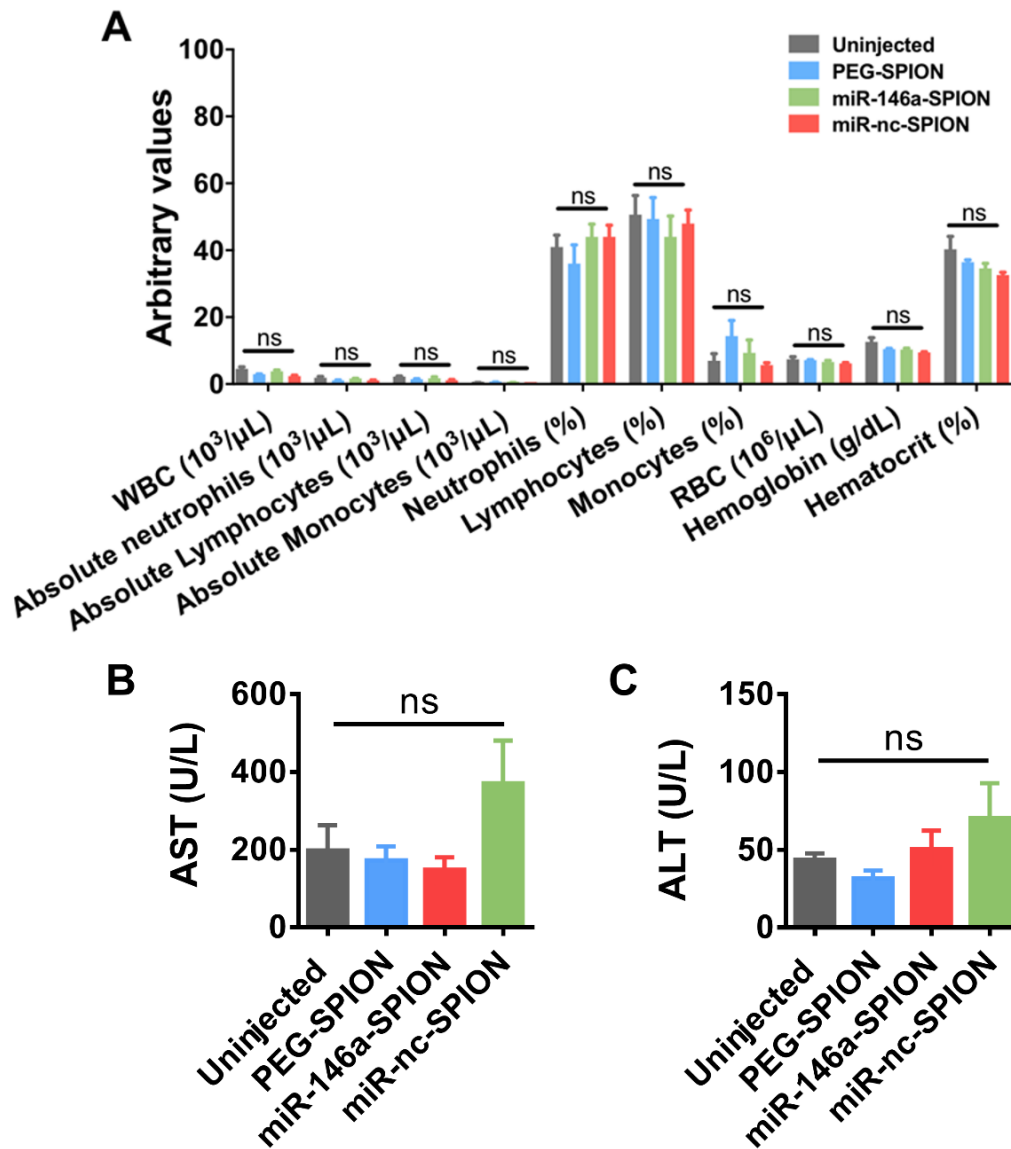

**Fig. S38. *In vivo* long-term toxicity of various types of SPIONs following a complete treatment in ApoE<sup>-/-</sup> mice by complete blood cell count and liver function.** The treatment includes 6 doses over a period of 3 weeks, followed by a 4-week treatment period to observe the effect of treatment on long-term toxicity. **(A)** Compared to uninjected mice (black), PEG-SPIONs (blue), miR-146a-SPIONs (red), or miR-nc-SPIONs (green) showed no significant difference in blood chemistry markers or cell counts. WBC: white blood cell. RBC: red blood cell. Absolute neutrophils, lymphocytes, or monocytes ( $10^3/\mu\text{L}$ ): cell number per volume of blood. Neutrophils %, lymphocytes %, monocytes %: percentage cells among total WBC. RBC ( $10^6/\mu\text{L}$ ): cell number per volume of blood. Data are presented as mean  $\pm$  SEM. Statistical significance was calculated by one-way ANOVA with Tukey's Test for post-hoc analysis, ns: not significant ( $P > 0.05$ ). Liver toxicity examined by measuring levels of serum **(B)** aspartate aminotransferase (AST) and **(C)** alanine transaminase (ALT). Data are presented as means  $\pm$  SEM. Statistical significance was calculated by one-way ANOVA with Tukey's Test for post-hoc analysis, ns: not significant ( $P > 0.05$ ).  $n = 3$  mice per group, across 1 experiment.

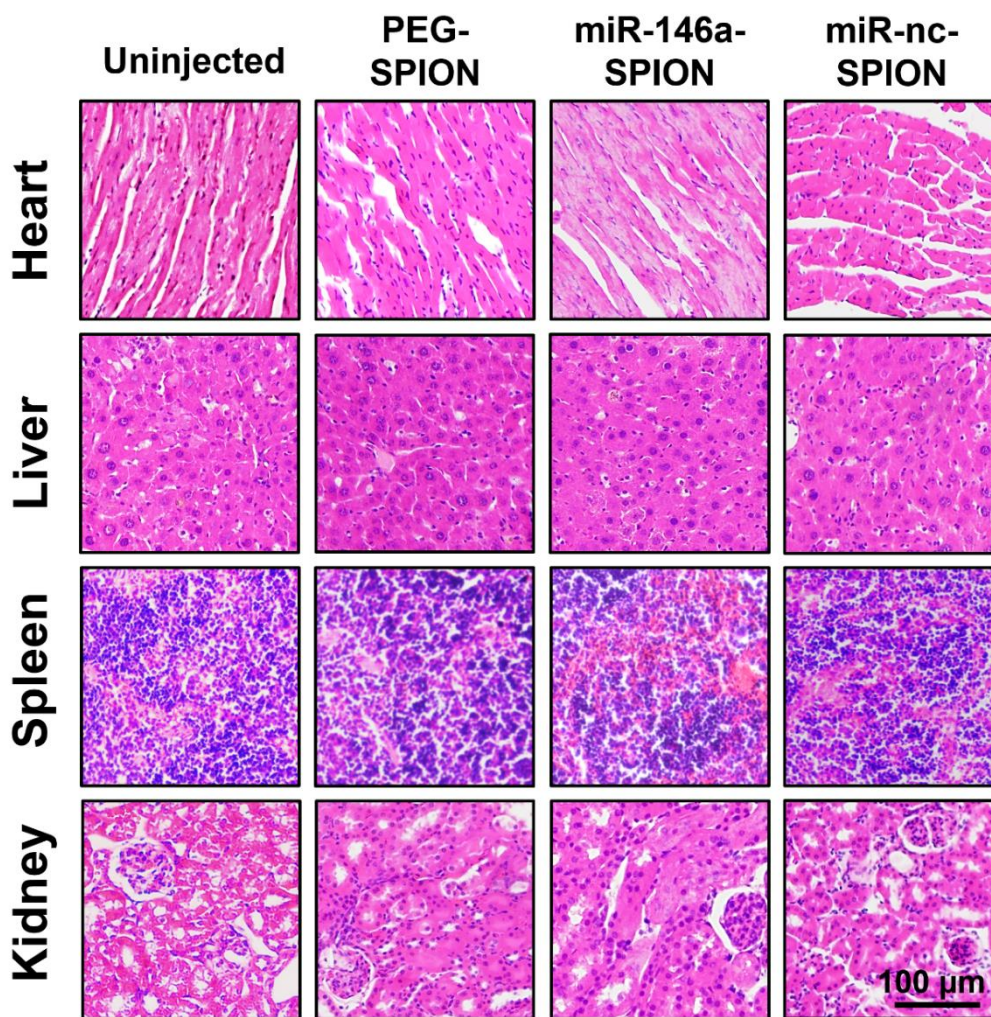

**Fig. S39. *In vivo* long-term toxicity of various types of SPIONs following a complete treatment in ApoE<sup>-/-</sup> mice by histological examination.** The treatment includes 6 doses over a period of 3 weeks, followed by a 4-week treatment period to observe the effect of treatment on long-term toxicity. Histological examination of the heart, liver, spleen, and kidney harvested from ApoE<sup>-/-</sup> mice with advanced atherosclerotic plaques that were subject to different treatments showed no appreciable change in tissue morphology. Representative images were chosen from n = 6 mice per group, across 2 experiments.

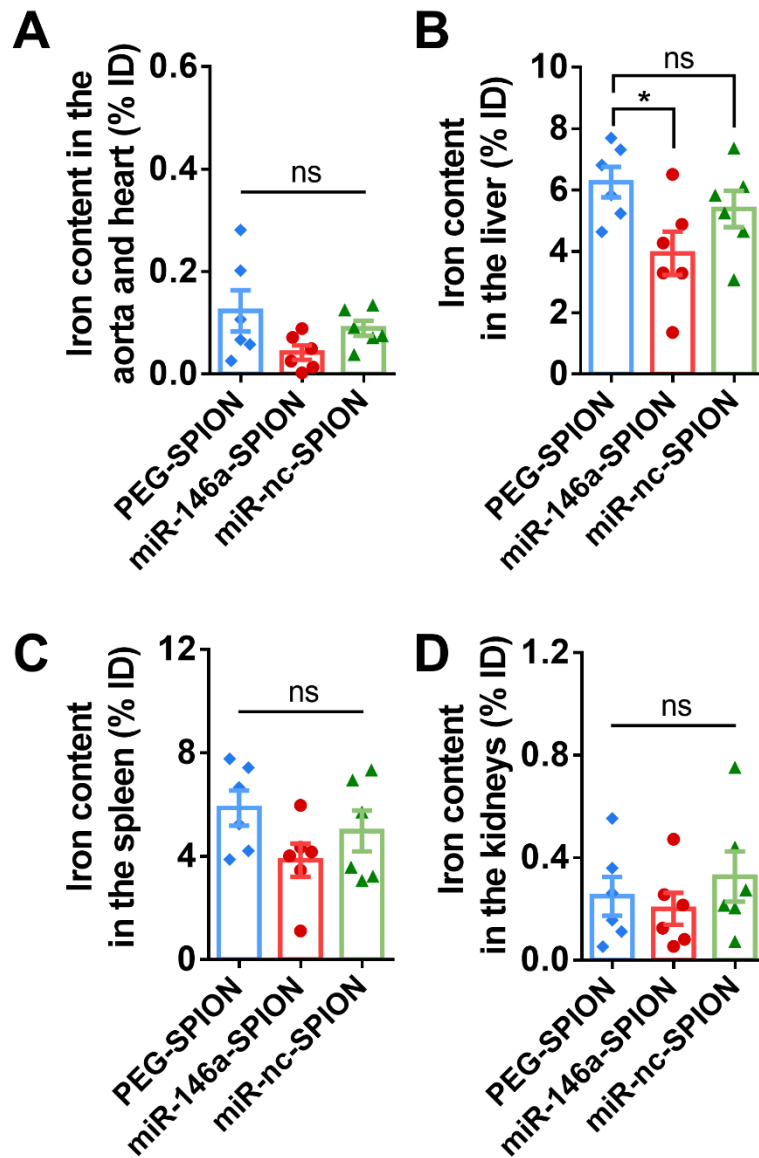

**Fig. S40. *In vivo* long-term clearance of various types of SPIONs following a complete treatment in ApoE<sup>-/-</sup> mice.** The treatment includes 6 doses over a period of 3 weeks. Four weeks after the treatment, major organs such as (A) aorta and heart, (B) liver, (C) spleen and (D) kidneys were collected after sacrificing the mice for ICP-MS measurement. The iron contents in these major organs four-week after treatment are lower than those in the same organs 24 h after a single injection (Fig. S22). Data are presented as means  $\pm$  SEM. Statistical significance was calculated by one-way ANOVA with Tukey's Test for post-hoc analysis. ns: not significant ( $P > 0.05$ ), \* $P < 0.05$ .  $n = 6$  mice per group, across 2 experiments.

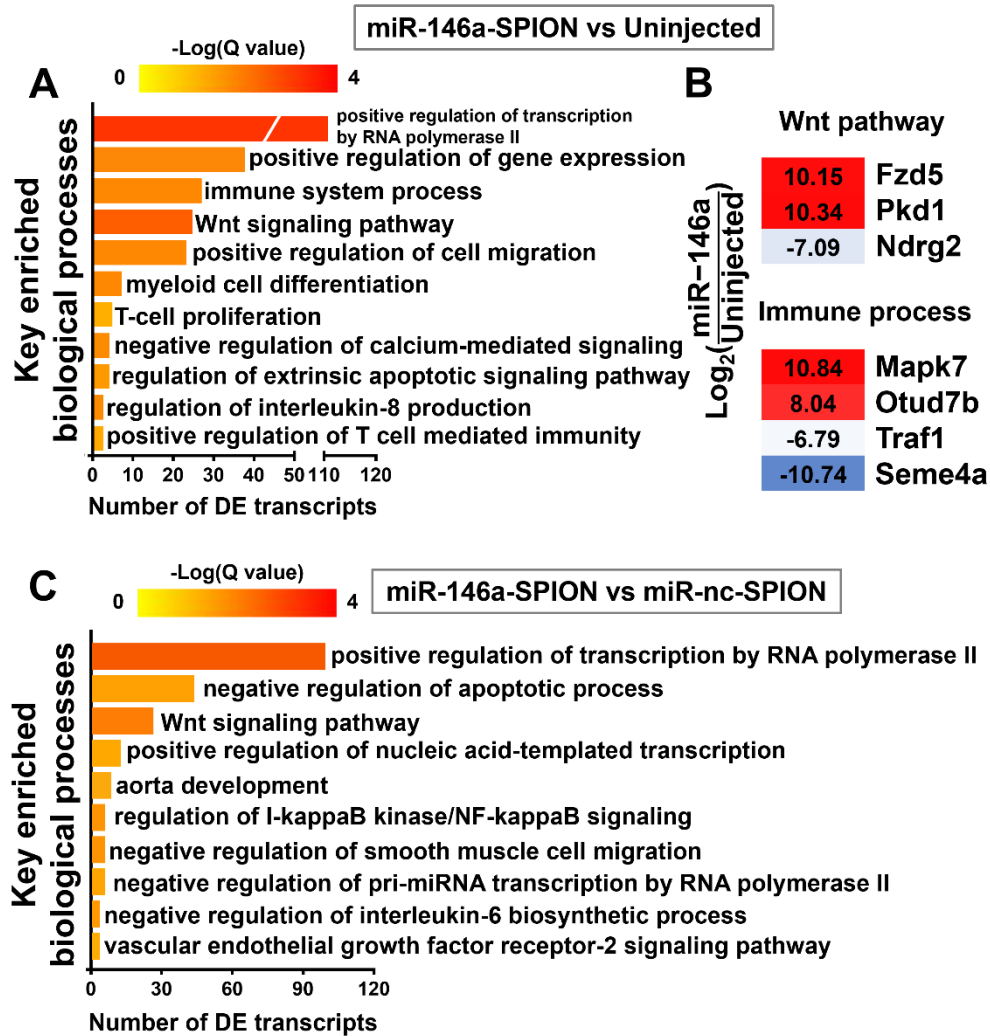

**Fig. S41. Statistically enriched gene ontology (GO) terms.** Key enriched biological processes found by comparing the (A) “miR-146a-SPION” group to the “Untreated” group and (C) “miR-146a-SPION” group to the “miR-nc-SPION” group.  $n=3$ ;  $Q < 0.05$ . (B) Representative DETs found in the comparison between “miR-146a-SPION” and “Uninjected” groups indicate the effect of miR-146a-SPION treatment on gene expression. Panels A and C corresponds to the pairwise comparisons listed on Tables S5 and S6, respectively. Panel B also shows representative DETs found in comparisons between “miR-146a-SPION” and “Untreated” groups.

**Table S4. Enriched biological process found in the pairwise comparison “miR-146a-SPION” vs “PEG-SPION” (Q value < 0.05).**

| <b>GO_ Biological Process</b>                                           | <b>Q value</b> |
|-------------------------------------------------------------------------|----------------|
| phosphorylation                                                         | 5.27554E-08    |
| positive regulation of transcription, DNA-templated                     | 0.00041        |
| positive regulation of cell migration                                   | 0.00059        |
| <b>positive regulation of transcription by RNA polymerase II ##</b>     | 0.00059        |
| negative regulation of transcription by RNA polymerase II               | 0.00082        |
| chromatin organization                                                  | 0.00082        |
| regulation of cardiac muscle cell proliferation                         | 0.00109        |
| positive regulation of GTPase activity                                  | 0.00170        |
| peptidyl-serine phosphorylation                                         | 0.00345        |
| <b>positive regulation of gene expression ##</b>                        | 0.00373        |
| embryonic hemopoiesis                                                   | 0.01158        |
| rhythmic process                                                        | 0.01158        |
| endocytosis                                                             | 0.01221        |
| innate vocalization behavior                                            | 0.01221        |
| anoikis                                                                 | 0.01956        |
| ventricular trabecula myocardium morphogenesis                          | 0.02045        |
| <b>cellular response to tumor necrosis factor ##</b>                    | 0.02148        |
| <b>interleukin-21 secretion ##</b>                                      | 0.02148        |
| ubiquitin-dependent protein catabolic process                           | 0.02471        |
| <b>Wnt signaling pathway ##</b>                                         | 0.02471        |
| peptidyl-threonine phosphorylation                                      | 0.02471        |
| <b>interleukin-1 alpha production ##</b>                                | 0.02471        |
| <b>endothelial cell activation ##</b>                                   | 0.02471        |
| positive regulation of proteasomal protein catabolic process            | 0.02471        |
| <b>NLRP1 inflammasome complex assembly ##</b>                           | 0.02471        |
| cellular response to ionomycin                                          | 0.02504        |
| pre-B cell differentiation                                              | 0.02956        |
| positive regulation of multicellular organism growth                    | 0.03183        |
| regulation of protein binding                                           | 0.03183        |
| <b>regulation of monocyte differentiation ##</b>                        | 0.03183        |
| negative regulation of transcription, DNA-templated                     | 0.03183        |
| <b>regulation of macrophage colony-stimulating factor production ##</b> | 0.03183        |
| <b>immune system process ##</b>                                         | 0.03741        |
| forebrain development                                                   | 0.03741        |
| homeostasis of number of cells                                          | 0.03741        |
| positive regulation of epithelial cell proliferation                    | 0.03741        |
| cardiovascular system development                                       | 0.03741        |
| regulation of non-motile cilium assembly                                | 0.03781        |
| osteoclast development                                                  | 0.04145        |
| <b>regulation of I-kappaB kinase/NF-kappaB signaling ##</b>             | 0.04145        |
| regulation of defense response to bacterium                             | 0.04208        |
| <b>positive regulation of apoptotic signaling pathway ##</b>            | 0.04350        |
| <b>negative regulation of interleukin-6 biosynthetic process ##</b>     | 0.04525        |
| protein phosphorylation                                                 | 0.04553        |
| striatum development                                                    | 0.04553        |
| lung secretory cell differentiation                                     | 0.04553        |
| regulation of lung goblet cell differentiation                          | 0.04553        |
| negative regulation of lung goblet cell differentiation                 | 0.04553        |
| angiogenesis                                                            | 0.04588        |
| <b>chemokine (C-C motif) ligand 2 secretion ##</b>                      | 0.04635        |
| regulation of protein complex assembly                                  | 0.04635        |
| <b>T follicular helper cell differentiation ##</b>                      | 0.04635        |
| positive regulation of hydrogen peroxide-induced cell death             | 0.04635        |



|                                                             |         |
|-------------------------------------------------------------|---------|
| cerebral cortex development                                 | 0.04676 |
| mammary gland epithelial cell proliferation                 | 0.04676 |
| lateral mesoderm development                                | 0.04676 |
| smooth muscle tissue development                            | 0.04676 |
| pigment granule localization                                | 0.04676 |
| pigment granule transport                                   | 0.04676 |
| regulation of neural crest cell differentiation             | 0.04676 |
| regulation of neural crest cell fate specification          | 0.04676 |
| <b>lipid metabolic process ##</b>                           | 0.04791 |
| N-acetylneuraminic acid metabolic process                   | 0.04809 |
| sensory perception                                          | 0.04998 |
| <b>positive regulation of endothelial cell migration ##</b> | 0.04998 |
| heart formation                                             | 0.04998 |

Note: The lines indicated by “##” are the enriched biological processes shown in Fig. 5B that are directly related to the anti-atherosclerosis efficacy of the miR-146a-coating.

**Table S5. Enriched biological process found in the pairwise comparison “miR-146a-SPION” vs “Untreated” (Q value < 0.05).**

| <b>GO_Biological Process</b>                                                    | <b>Q value</b> |
|---------------------------------------------------------------------------------|----------------|
| <b>positive regulation of transcription by RNA polymerase II ##</b>             | 0.00065        |
| chromatin organization                                                          | 0.00281        |
| <b>Wnt signaling pathway ##</b>                                                 | 0.00281        |
| post-embryonic development                                                      | 0.00601        |
| response to denervation involved in regulation of muscle adaptation             | 0.00855        |
| positive regulation of protein tyrosine phosphatase activity                    | 0.00956        |
| <b>immune system process ##</b>                                                 | 0.01186        |
| <b>myeloid cell differentiation ##</b>                                          | 0.01186        |
| <b>positive regulation of cell migration ##</b>                                 | 0.01186        |
| regulation of heart growth                                                      | 0.01186        |
| <b>positive regulation of gene expression ##</b>                                | 0.01255        |
| phosphorylation                                                                 | 0.01411        |
| multicellular organism growth                                                   | 0.01457        |
| regulation of humoral immune response mediated by circulating immunoglobulin    | 0.01474        |
| regulation of B cell proliferation                                              | 0.01474        |
| <b>regulation of interleukin-8 production ##</b>                                | 0.01474        |
| plasma membrane raft distribution                                               | 0.01474        |
| <b>negative regulation of calcium-mediated signaling ##</b>                     | 0.01474        |
| positive regulation of antigen receptor-mediated signaling pathway              | 0.01474        |
| immunoglobulin biosynthetic process                                             | 0.01985        |
| ubiquitin-dependent protein catabolic process                                   | 0.02497        |
| digestive tract development                                                     | 0.02853        |
| histone H4 deacetylation                                                        | 0.02853        |
| <b>regulation of extrinsic apoptotic signaling pathway ##</b>                   | 0.02853        |
| B cell differentiation                                                          | 0.03145        |
| embryonic camera-type eye development                                           | 0.03611        |
| response to gamma radiation                                                     | 0.03909        |
| actin polymerization or depolymerization                                        | 0.03921        |
| regulation of cell cycle                                                        | 0.03921        |
| positive regulation of hematopoietic stem cell migration                        | 0.03921        |
| protein O-linked glycosylation                                                  | 0.03979        |
| regulation of gene expression                                                   | 0.03979        |
| positive regulation of ARF protein signal transduction                          | 0.03979        |
| mammary gland epithelial cell proliferation                                     | 0.03979        |
| positive regulation of transcription, DNA-templated                             | 0.03979        |
| regulation of protein tyrosine kinase activity                                  | 0.04028        |
| embryonic organ development                                                     | 0.04053        |
| positive regulation of GTPase activity                                          | 0.04234        |
| reproductive structure development                                              | 0.04234        |
| <b>positive regulation of T cell mediated immunity ##</b>                       | 0.04321        |
| angiogenesis involved in wound healing                                          | 0.04321        |
| protein polyubiquitination                                                      | 0.04642        |
| glandular epithelial cell development                                           | 0.04642        |
| negative regulation of cell adhesion involved in substrate-bound cell migration | 0.04642        |
| visceral muscle development                                                     | 0.04642        |
| negative regulation of interleukin-2 biosynthetic process                       | 0.04642        |
| SCF-dependent proteasomal ubiquitin-dependent protein catabolic process         | 0.04716        |
| positive regulation of stem cell proliferation                                  | 0.04716        |
| histone deacetylation                                                           | 0.04774        |
| brain renin-angiotensin system                                                  | 0.0478         |
| <b>T cell proliferation ##</b>                                                  | 0.0478         |
| regulation of myeloid cell differentiation                                      | 0.0478         |

|                                                 |        |
|-------------------------------------------------|--------|
| regulation of B cell receptor signaling pathway | 0.0478 |
| embryonic placenta morphogenesis                | 0.0478 |
| cellular response to BMP stimulus               | 0.0478 |

Note: The lines indicated by “##” are the enriched biological processes shown in Fig. S41A that are directly related to the anti-atherosclerosis efficacy of the miR-146a-SPIONs.

**Table S6. Enriched biological process found in the pairwise comparison “miR-146a-SPION” vs “miR-nc-SPION” (Q value < 0.05).**

| <b>GO_Biological Process</b>                                                  | <b>Q value</b> |
|-------------------------------------------------------------------------------|----------------|
| chromatin organization                                                        | 0.00160        |
| hematopoietic stem cell proliferation                                         | 0.00160        |
| phosphorylation                                                               | 0.00260        |
| <b>positive regulation of transcription by RNA polymerase II ##</b>           | 0.00260        |
| histone deacetylation                                                         | 0.00778        |
| embryonic placenta development                                                | 0.00868        |
| <b>positive regulation of MAPK cascade ##</b>                                 | 0.00893        |
| Wnt signaling pathway                                                         | 0.01691        |
| positive regulation of GTPase activity                                        | 0.01709        |
| ubiquitin-dependent protein catabolic process                                 | 0.02047        |
| <b>negative regulation of smooth muscle cell migration ##</b>                 | 0.02047        |
| histone H4 deacetylation                                                      | 0.02047        |
| <b>negative regulation of pri-miRNA transcription by RNA polymerase II ##</b> | 0.02047        |
| regulation of insulin-like growth factor receptor signaling pathway           | 0.02107        |
| cell motility involved in cerebral cortex radial glia guided migration        | 0.02146        |
| protein deacetylation                                                         | 0.02224        |
| protein ubiquitination                                                        | 0.02224        |
| secretory granule organization                                                | 0.02224        |
| <b>vascular endothelial growth factor receptor-2 signaling pathway ##</b>     | 0.02224        |
| reelin-mediated signaling pathway                                             | 0.02224        |
| proteasome-mediated ubiquitin-dependent protein catabolic process             | 0.02224        |
| rhythmic process                                                              | 0.02224        |
| negative regulation of blood pressure                                         | 0.02702        |
| protein polyubiquitination                                                    | 0.02813        |
| regulation of growth                                                          | 0.02813        |
| negative regulation of cellular protein catabolic process                     | 0.02841        |
| heterochromatin assembly                                                      | 0.03311        |
| <b>negative regulation of apoptotic process ##</b>                            | 0.03382        |
| <b>positive regulation of nucleic acid-templated transcription ##</b>         | 0.04001        |
| cell cycle                                                                    | 0.04244        |
| positive regulation of transcription, DNA-templated                           | 0.04244        |
| positive regulation of protein autoubiquitination                             | 0.04244        |
| wound healing                                                                 | 0.04308        |
| skeletal system development                                                   | 0.04614        |
| lysosome organization                                                         | 0.04614        |
| phospholipid transport                                                        | 0.04614        |
| <b>aorta development ##</b>                                                   | 0.04614        |
| <b>regulation of I-kappaB kinase/NF-kappaB signaling ##</b>                   | 0.04614        |
| regulation of stress fiber assembly                                           | 0.04614        |
| positive regulation of neuron migration                                       | 0.04614        |
| <b>negative regulation of interleukin-6 biosynthetic process ##</b>           | 0.04698        |

Note: The lines indicated by “##” are the enriched biological processes shown in Fig. S41C that are directly related to the anti-atherosclerosis efficacy of the miR-146a-SPIONs.

## SI References

1. L. Zhang *et al.*, Promoting the delivery of nanoparticles to atherosclerotic plaques by DNA coating. *ACS Appl. Mater. Interfaces* **11**, 13888–13904 (2019).
2. M. Nahrendorf *et al.*, Noninvasive vascular cell adhesion molecule-1 imaging identifies inflammatory activation of cells in atherosclerosis. *Circulation* **114**, 1504–1511 (2006).
3. A. Maiseyeu *et al.*, In vivo targeting of inflammation-associated myeloid-related protein 8/14 via gadolinium immunonanoparticles. *Arterioscler. Thromb. Vasc. Biol.* **32**, 962–970 (2012).
4. A. L. de Barros *et al.*, Assessment of global cardiac uptake of radiolabeled iron oxide nanoparticles in apolipoprotein-E-deficient mice: implications for imaging cardiovascular inflammation. *Mol. Imaging Biol.* **16**, 330–339 (2014).
5. M. D. Majmudar *et al.*, Polymeric nanoparticle PET/MR imaging allows macrophage detection in atherosclerotic plaques. *Circ. Res.* **112**, 755–761 (2013).
6. S. Wen *et al.*, In vivo MRI detection of carotid atherosclerotic lesions and kidney inflammation in ApoE-deficient mice by using LOX-1 targeted iron nanoparticles. *Nanomedicine* **10**, 639–649 (2014).
7. J. Tang *et al.*, Inhibiting macrophage proliferation suppresses atherosclerotic plaque inflammation. *Sci. Adv.* **1**, e1400223 (2015).
8. H. P. Luehmann, *et al.*, PET/CT imaging of chemokine receptors in inflammatory atherosclerosis using targeted nanoparticles. *J. Nucl. Med.* **57**, 1124–1129 (2016).
9. J. Tang *et al.*, Immune cell screening of a nanoparticle library improves atherosclerosis therapy. *Proc. Natl. Acad. Sci. U. S. A.* **113**, E6731–E6740 (2016).
10. P. Chhour *et al.*, Labeling monocytes with gold nanoparticles to track their recruitment in atherosclerosis with computed tomography. *Biomaterials* **87**, 93–103 (2016).
11. T. J. Beldman *et al.*, Hyaluronan nanoparticles selectively target plaque-associated macrophages and improve plaque stability in atherosclerosis. *ACS Nano* **11**, 5785–5799 (2017).
12. C. Jiang *et al.*, Dynamically enhancing plaque targeting via a positive feedback loop using multifunctional biomimetic nanoparticles for plaque regression. *J. Control. Release* **308**, 71–85 (2019).
13. S. H. Nasr *et al.*, Effective atherosclerotic plaque inflammation inhibition with targeted drug delivery by hyaluronan conjugated atorvastatin nanoparticles. *Nanoscale* **12**, 9541–9556 (2020).
14. K. M. Tsoi, *et al.*, Mechanism of hard-nanomaterial clearance by the liver. *Nat. Mater.* **15**, 1212–1221 (2016).
